1 **The peripheral T cell population is associated with pneumonia severity**  
2 **in cynomolgus monkeys experimentally infected with severe acute**  
3 **respiratory syndrome coronavirus 2**

4

5 Running title: Pathogenesis of SARS-CoV-2 in a macaque model

6

7 Noriyo Nagata<sup>1\*</sup>, Naoko Iwata-Yoshikawa<sup>1</sup>, Kaori Sano<sup>1</sup>, Akira Aina<sup>1</sup>, Nozomi Shiwa<sup>1</sup>,  
8 Masayuki Shirakura<sup>2</sup>, Noriko Kishida<sup>2</sup>, Tomoko Arita<sup>2</sup>, Yasushi Suzuki<sup>2</sup>, Toshihiko Harada<sup>3</sup>,  
9 Yasuhiro Kawai<sup>3</sup>, Yasushi Ami<sup>3</sup>, Shun Iida<sup>1,4</sup>, Harutaka Katano<sup>1</sup>, Seiichiro Fujisaki<sup>2</sup>, Tsuyoshi  
10 Sekizuka<sup>5</sup>, Hiroyuki Shimizu<sup>6</sup>, Tadaki Suzuki<sup>1¶</sup>, Hideki Hasegawa<sup>2¶</sup>

11

12 <sup>1</sup> Department of Pathology, National Institute of Infectious Diseases, Tokyo, Japan

13 <sup>2</sup> Influenza Virus Research Center, National Institute of Infectious Diseases, Tokyo, Japan

14 <sup>3</sup> Management Department of Biosafety and Laboratory Animal, National Institute of Infectious  
15 Diseases, Tokyo, Japan

16 <sup>4</sup> Division of Infectious Diseases Pathology, Department of Global Infectious Diseases, Tohoku  
17 University Graduate School of Medicine, Miyagi, Japan

18 <sup>5</sup> Pathogen Genomics Center, National Institute of Infectious Diseases, Tokyo, Japan

19 <sup>6</sup> Department of Virology II, National Institute of Infectious Diseases, Tokyo, Japan

20

21 \*Corresponding author:

22 E-mail: [nnagata@nih.go.jp](mailto:nnagata@nih.go.jp) (NN)

23 <sup>¶</sup>These authors contributed equally to this work.

24

## 25 **Abstract**

26 The coronavirus disease 2019 (COVID-19), caused by severe acute respiratory syndrome  
27 coronavirus 2 (SARS-CoV-2), is a global pandemic that began in December 2019.  
28 Lymphopenia is a common feature in severe cases of COVID-19; however, the role of T cell  
29 responses during infection is unclear. Here, we inoculated six cynomolgus monkeys, divided  
30 into two groups according to the CD3<sup>+</sup> T cell population in peripheral blood, with two clinical  
31 isolates of SARS-CoV-2: one of East Asian lineage and one of European lineage. After initial  
32 infection with the isolate of East Asian lineage, all three monkeys in the CD3<sup>+</sup> low group  
33 showed clinical symptoms, including loss of appetite, lethargy, and transient severe anemia  
34 with/without short-term fever, within 14 days post-infection (p.i.). By contrast, all three  
35 monkeys in the CD3<sup>+</sup> high group showed mild clinical symptoms such as mild fever and loss of  
36 appetite within 4 days p.i. and then recovered. After a second inoculation with the isolate of  
37 European lineage, three of four animals in both groups showed mild clinical symptoms but  
38 recovered quickly. Hematological, immunological, and serological tests suggested that the  
39 CD3<sup>+</sup> high and low groups mounted different immune responses during the initial and second  
40 infection stages. In both groups, anti-viral and innate immune responses were activated during  
41 the early phase of infection and re-infection. However, in the CD3<sup>+</sup> low group, inflammatory  
42 responses, such as increased production of monocytes and neutrophils, were stronger than those  
43 in the CD3<sup>+</sup> high group, leading to more severe immunopathology and failure to eliminate the  
44 virus. Taken together, the data suggest that the peripheral T lymphocyte population is associated  
45 with pneumonia severity in cynomolgus monkeys experimentally infected with SARS-CoV-2.

46

47 **Author summary**

48 SARS-CoV-2 infection causes an illness with clinical manifestations that vary from  
49 asymptomatic or mild to severe; examples include severe pneumonia and acute respiratory  
50 distress syndrome. Lymphopenia, which is common in severe COVID-19 cases, is characterized  
51 by markedly reduced numbers of CD4+ T cells, CD8+ T cells, B cells, and natural killer cells.  
52 Here, we showed that cynomolgus monkeys selected according to the T cell populations in  
53 peripheral blood have different outcomes after experimental infection with SARS-CoV-2. These  
54 findings will increase our understanding of disease pathogenesis and may facilitate the  
55 development of animal models for vaccine evaluation.

56

## 57 **Introduction**

58 Coronavirus disease 2019 (COVID-19), caused by a novel human coronavirus called severe  
59 acute respiratory syndrome coronavirus 2 (SARS-CoV-2), is a global pandemic that began in  
60 December, 2019 after cases of an unknown upper respiratory tract infection were reported in  
61 Wuhan, Hubei Province, China [1-3]. The World Health Organization declared a global  
62 pandemic on March 11, 2020; since then, the number of confirmed cases and the number of  
63 deaths has increased rapidly, reaching over 1 million by the end of September 2020 [4].

64 SARS-CoV-2 causes an illness with clinical manifestations ranging from an  
65 asymptomatic or mild infection to a serious illness (i.e., severe pneumonia and acute respiratory  
66 distress syndrome) [3, 5, 6]. Pathological studies suggest that SARS-CoV-2 infection of the  
67 lower respiratory tract causes disease directly [7, 8]. In addition, high expression of  
68 pro-inflammatory cytokines, including IL-6 and IL-1 $\beta$ , in serum from patients with severe  
69 COVID-19 suggest that immunopathological damage caused by an over-exuberant host  
70 response might contribute to poor outcomes [3, 9, 10]; this is similar to other coronavirus  
71 infections such as SARS and Middle East respiratory syndrome (MERS) [11-15]. Lymphopenia  
72 is a common characteristic of severe COVID-19; severe cases show a marked reduction in the  
73 numbers of CD4+ T cells, CD8+ T cells, B cells, and natural killer (NK) cells [3, 9, 10].  
74 Because T cells may mediate early innate immune responses to virus infection [16],  
75 lymphopenia might be associated with severe disease. However, the role of T cell responses  
76 during COVID-19 infection is unclear.

77 Several experimental models, including cats, chickens, dogs, ducks, ferrets, mice,  
78 hamsters, macaque monkeys, and pigs, have been used to study COVID-19 [17, 18]. Cats,

79 ferrets, human ACE2 transgenic mice, hamsters, and monkeys are all susceptible to  
80 SARS-CoV-2 after respiratory inoculation and all exhibit virus excretion from the upper  
81 respiratory tract and/or intestine [19-26]. These animals develop acute pulmonary lesions after  
82 inoculation with a high dose of virus, but clinical symptoms are mild. As in human cases of  
83 SARS, advanced age correlates with adverse outcomes in mice and macaque monkeys [27, 28].  
84 However, cynomolgus monkeys do not show age-dependent differences in severity after  
85 experimental infection with SARS-CoV-2 [20].

86           Previously, we found that experimental infection of cynomolgus monkeys with  
87 human viral pathogens resulted in a few severe cases [29]. Pathophysiological analysis  
88 suggested that low populations of lymphocytes were related to the severe clinical symptoms  
89 after experimental infection with virus. Thus, we speculated that low T cell populations in  
90 peripheral blood might cause poor outcomes after SARS-CoV-2 infection of monkeys. To test  
91 this hypothesis, we selected monkeys according to the T cell population in peripheral blood, and  
92 infected them with an isolate of SARS-CoV-2 obtained from an individual who returned from  
93 Wuhan at the end of January 2020. We then monitored the clinical symptoms, immune  
94 responses, and lung pathology. In addition, we examined the effect of a previous infection with  
95 SARS-CoV-2 by re-infecting monkeys with a heterologous strain to evaluate whether it  
96 enhanced the symptoms of respiratory disease. We did this by re-challenging monkeys with  
97 another isolate, a “S-G614 variant strain”, isolated from a returnee from Europe at the end of  
98 March 2020. The results suggest that the peripheral T lymphocyte population in peripheral  
99 blood is related to severity of pneumonia in cynomolgus monkeys experimentally infected with  
100 SARS-CoV-2.

101

## 102 **Results**

### 103 **Experimental infection of cynomolgus monkeys with SARS-CoV-2**

104 An overview of the study design is shown in Figure 1A. Twenty-five female monkeys were  
105 used. Body weight was measured (S1A Fig) and blood samples obtained for use in a  
106 SARS-CoV-2 neutralization assay. All animals except one had undetectable (<1:4) levels of  
107 neutralizing antibodies; the exception had a titer of 1:4. The blood samples were also used to  
108 investigate the number of lymphocytes and the population of CD3+ cells within the total  
109 lymphocyte population (S1B Fig). After assigning animals into "CD3+ high" and "CD3+ low"  
110 groups, six cynomolgus monkeys were selected according to body weight (only monkeys  
111 weighing 3.5 kg or less were appropriate due to facility restrictions) and CD3+ cell count, and  
112 then used in the infection experiments.

113 In this study, we used two isolates of SARS-CoV-2 from Japan: one of East Asian  
114 lineage obtained at the end of January 2020, and another of European lineage obtained at end of  
115 March 2020 (Table 1).

116

117 **Table 1. Clinical isolates of SARS-CoV-2 used in this study**

| Strain                              | Origin          |             | Accession no.  | GISAID Clade* /<br>region of exposure | Passage history for the animal experiment in this study |              |               |
|-------------------------------------|-----------------|-------------|----------------|---------------------------------------|---------------------------------------------------------|--------------|---------------|
|                                     | Collection date | Specimen    |                |                                       | Cell                                                    | Propagation  | Mycoplasma*** |
| 2019-nCoV/Japan /TY<br>/WK-521/2020 | Jan 31, 2020    | Throat swab | EPI_ISL_408667 | S / East Asia                         | VeroE6<br>/TMPRSS2                                      | 8 passages** | Negative      |
| hCoV-19/Japan/<br>QH-329-037/2020   | 29 Mar 2020     | Throat swab | EPI_ISL_529135 | G / Europe                            | VeroE6<br>/TMPRSS2                                      | 2 passages   | Positive      |

118 GSAID, Global Initiative on Sharing All Influenza Data.

119 \*GSAID clade referred from "Clade and lineage nomenclature, July 4, 2020"

120 <https://www.gisaid.org/references/statements-clarifications/clade-and-lineage-nomenclature-aids-in-genomic-epidemiology-of-active-hcov-19-viruses/>.

121 \*\*WK-521 was isolated using VeroE6/TMPRSS2 cells unexpectedly contaminated with *Mycoplasma hyorhinis* and *Mycoplasma arginini* (Matsuyama  
122 et al., 2020). Anti-mycoplasma reagents (MC-210, 0.5 µg/mL; Waken, Kyoto, Japan) were used to eradicate mycoplasma contamination from the cells  
123 and virus stock during virus propagation from passages 4 to 6.

124 \*\*\*Mycoplasma contamination was detected by PCR (TaKaRa PCR Mycoplasma Detection Set, Takara, Shiga, Japan).

125 The first inoculation with the isolate of East Asian lineage  
126 (2019-nCoV/Japan/TY/WK-521/2020, referred to as WK-521) was administered via a  
127 combination of the intranasal (0.25 mL, spray into right nostril), conjunctival (0.1 mL, drop on  
128 right eye), and intratracheal (1 mL virus solution plus 2 mL saline using a catheter) routes under  
129 ketamine-xylazine anesthesia; the monkeys were observed once daily for clinical signs and  
130 scored using a clinical scoring system (dietary intake, including pellets and fruits, drinking,  
131 attitude in front of regular observers, and stool consistency: the total score was the sum of all  
132 five component scores (i.e.,  $0-5 \times 5$ ). (Fig. 1B).

133 All monkeys showed reduced appetite, drank less, and became more lethargic within  
134 4–10 days after the initial inoculation. Two animals (#5412 and #5417) from the CD3+ low  
135 group showed lower clinical scores than that for the CD3+ high group from 5 to 14 days p.i.  
136 Monkey #5412 became lethargic around 10 days after the initial inoculation but ate a piece of  
137 fruit every day; therefore, we decided not to euthanize this animal. Indeed, the monkey  
138 recovered from severe illness at around 14 days p.i. After the second inoculation with another  
139 isolate of European lineage (hCoV-19/Japan/ QH-329-037/2020, referred to as QH-329-037) at  
140 35 days after the initial inoculation (referred to as R0d in Fig. 1), all monkeys except #5405  
141 showed a reduced clinical score and recovered within 1 week. No obvious body weight loss was  
142 observed; indeed, monkey #5405 gained weight (S2A Fig). In all monkeys, body temperature  
143 spiked 1 day after the initial inoculation but then returned to normal (the exception was monkey  
144 #5405) (S3 Fig). Monkey #5405 continued to have a slightly higher temperature than before the  
145 initial inoculation. At 1 day after the second inoculation, two monkeys from the CD3+ high  
146 group (#5399 and #5403) showed a spike in body temperature. Biochemical markers (globulin:



147 Glob, albumin: ALB, and glucose) suggested changes in nutritional status after both the initial  
148 and second inoculations (S2B Fig).

149 Two monkeys from the CD3<sup>+</sup> low group showed low hemoglobin (HGB) levels: one at 7 days  
150 (monkey #5417, at the time of planned autopsy) and one at 10 days (monkey #5412) after initial  
151 inoculation (Fig. 2A). Red blood cell (RBC) counts and hematocrit levels were also low in these  
152 monkeys (S4A Fig).

153

#### 154 **Immune responses in cynomolgus monkeys inoculated with SARS-CoV-2**

155 All monkeys showed transient lymphopenia at 1 day p.i., after which lymphocyte  
156 counts increased within the next 7 days (Fig. 2B). After the second inoculation, lymphocyte  
157 counts in all monkeys decreased at Day 1 p.i. before recovering again. Mixed-effects models for  
158 repeated measures analysis revealed significant differences in the number of lymphocytes  
159 between the two groups. By contrast, monocyte counts after the first injection increased before  
160 falling again within 7 days p.i. (Fig. 2B). After the second inoculation, monocyte counts did not  
161 change significantly. Various changes in the numbers of other leukocytes, including neutrophils,  
162 eosinophils, basophils, were seen during infection (S4B Fig).

163 Flow cytometry analysis revealed that changes in the overall lymphocyte count were  
164 due to changes in the number of CD3<sup>+</sup> T cells (Fig. 2C). In both groups, CD20<sup>+</sup> B cell counts  
165 dropped at 1 day p.i. and then increased gradually until 28 days p.i., but interestingly, there was  
166 a significant difference between CD20<sup>+</sup> B cell counts in the CD3<sup>+</sup> high and low groups (Fig.  
167 2C). After the second inoculation, the number of CD20<sup>+</sup> B cells in both groups fell, before  
168 increasing again. Three monkeys showed high CD16<sup>+</sup> NK cell counts at 4 days after the initial

169 inoculation (Fig. 2C). After the second inoculation, CD16<sup>+</sup> NK cells numbers in all monkeys  
170 were higher than after the initial inoculation, although numbers remained low in monkey #5412.  
171 There was a significant difference in the number of CD3<sup>+</sup>CD4<sup>+</sup> T cells between the two groups  
172 (S4C Fig). CD3<sup>+</sup> cells, including CD4<sup>+</sup> and CD8<sup>+</sup> T cell counts, peaked at 7 days after the  
173 initial inoculation, but cell numbers increased rapidly after the second inoculation.

174           Levels of IL-6, interleukin 1 receptor antagonist (IL-1ra), monocyte chemotactic  
175 protein-1 (MCP-1), IL-15, IL-2, and macrophage inflammatory protein-1 beta (MIP-1 $\beta$ ) in  
176 serum peaked at 1 day after the initial inoculation; levels also increased at 1 day after the second  
177 inoculation, although the increase was smaller in both groups (Fig. 2D and S5A Fig). Levels of  
178 helper T cell (Th cell)-related cytokines, such as IL-12/23 (p40), interferon gamma (IFN- $\gamma$ ),  
179 tumor necrosis factor alpha (TNF- $\alpha$ ), IL-13, IL-10, and IL-17 increased from Day 10 post-initial  
180 inoculation, peaking at Day 14 or 21; expression increased rapidly (within 7 days) after the  
181 second inoculation (Fig. 2D and S5B Fig). The kinetics of Th cell-related cytokine responses  
182 (except IL-17) were faster in the CD3<sup>+</sup> high group than in the CD3<sup>+</sup> low group. Dynamic  
183 changes in transforming growth factor alpha (TGF- $\alpha$ ) and IL-8 levels were also observed in  
184 both groups during infection (S5C Fig).

185

## 186 **Virus shedding by cynomolgus monkeys inoculated with SARS-CoV-2**

187           After the initial inoculation with isolate WK-521, clinical samples (conjunctiva,  
188 nasal, throat, and rectal swabs) were collected. Viral RNA was detected by real-time RT-PCR,  
189 and infectious virus was detected by culture with TMPRSS2-Vero E6 cells (Fig. 3). The result  
190 revealed that two monkeys excreted infectious virus from the upper respiratory tract (nasal and

191 throat swabs from #5404) or intestine (rectal swab from #5412) after the initial inoculation.  
192 Real-time RT-PCR confirmed viral replication in the upper respiratory tract and intestine by  
193 detecting viral subgenomic mRNAs in swab samples that were positive for viral RNA [30].  
194 Actively-infected cells were detected in nasal swabs from two monkeys (#5403 and #5404) and  
195 in a rectal swab from one monkey (#5412) (Fig. 3 and S6 Fig). After the second inoculation,  
196 none of the monkeys excreted infectious virus, although viral subgenomic mRNA was detected  
197 in nasal (#5403) and rectal (#5412) swabs (Fig. 3).

198

#### 199 **Seroconversion after experimental infection with SARS-CoV-2**

200 No monkeys, including #5404 and #5417 euthanized on Day 7 p.i., showed  
201 seroconversion within 7 days p.i. Neutralizing antibodies were detected from 10 days (monkey  
202 #5399 in the CD3+ high group) or 14 days (the other three monkeys in both groups) after the  
203 initial inoculation, peaking at 21 days p.i. in the CD3+ high group and 28 days p.i. in the CD3+  
204 low group (Fig. 4A). Within 35 days p.i. (35d/R0d in Fig. 4A), the neutralizing antibody titer in  
205 monkeys #5399 and #5403 from the CD3+ high group fell slightly; overall, the antibody titers  
206 were higher in the CD3+ low group than in the CD3+ high group. After the second inoculation,  
207 neutralizing antibody titers increased rapidly at 4 days (R4d) p.i., peaking at 1:640 at 7 days  
208 (R7d) p.i., in all monkeys from both groups. Monkeys #5403 and #5412 were euthanized at R7  
209 days p.i. After this time point, the titers in monkeys #5399 and #5405 fell slightly to 1:320 at 14  
210 days. Sidak's multiple comparisons test after application of a mixed-effects models for repeated  
211 measures analysis revealed a significant difference in neutralizing antibody titers between the  
212 two groups. Serum obtained from the monkeys showed cross-reactivity with both strains of

213 virus (S1 Table).

214 We also used in-house IgM, IgA, and IgG enzyme-linked immunosorbent assay (ELISAs) to  
215 examine antibody isotypes and their binding to the spike (S), receptor binding domain (RBD),  
216 and nucleocapsid (N) proteins (Fig. 4B). At 7 or 10 days p.i., S-, RBD-, and N protein-specific  
217 IgM, IgA, and IgG antibody titers increased in both groups. Spearman's correlation analysis  
218 revealed that the IgA and IgG responses correlated with the neutralizing antibody response ( $R >$   
219 0.8). High levels of IgG antibodies specific for the S and RBD proteins were observed in  
220 monkey #5412, which showed prolonged excretion of infectious virus from the intestine after  
221 the initial inoculation.

222

## 223 **Transcriptomic analyses of peripheral whole blood from monkeys inoculated with** 224 **SARS-CoV-2**

225 Transcriptomic analyses were conducted using RNA extracted from peripheral whole  
226 blood samples collected at different time points: before initial inoculation (Day 0), after initial  
227 inoculation (Days 1, 4, and 7), before the second inoculation (R0), and after the second  
228 inoculation (R1, R4, and R7). Gene expression was compared between samples collected from  
229 animals before (Day 0) and after (Days 1, 4, 7, R0, R1, R4, and R7) virus inoculation to identify  
230 differentially expressed genes (S7A Fig). The results revealed that 331 genes were upregulated  
231 significantly, while 176 genes were downregulated significantly, after virus infection. Among  
232 the 507 differentially expressed genes, 78 were related to the immune response (S7B Fig). Next,  
233 we conducted gene set enrichment analyses using samples collected from the CD3<sup>+</sup> high and  
234 CD3<sup>+</sup> low groups after (Days 1, 4, 7, R0, R1, R4, and R7) virus infection (Fig. 5A). Expression

235 of genes encoding neutrophil-, monocyte-, and inflammatory signal-related modules were  
236 downregulated to a greater extent in the CD3+ high group than in the CD3+ low group (green  
237 dots in Fig. 5A), whereas expression of genes encoding B cell-related modules was upregulated  
238 to a greater extent in the CD3+ high group than in the CD3+ low group (gray dots in Fig. 5A).  
239 Furthermore, to evaluate differences in transcriptomic profiles over time, we conducted gene set  
240 enrichment analyses at baseline (before virus infection, Day 0) and at different time points after  
241 virus infection (Days 1, 4, 7, R0, R1, R4, and R7) (Fig. 5B). The results revealed significant  
242 upregulation of genes encoding innate anti-viral immune system-related modules (yellow dots  
243 in Fig. 5B) on Days 1 and 4 in both the CD3+ high and CD3+ low groups. Of note, upregulation  
244 of genes encoding inflammation-related modules (green & red dots in Fig. 5B) and  
245 downregulation of genes encoding T cell-related modules (black dots in Fig. 5B) were more  
246 prominent in the CD3+ low group than in the CD3+ high group. Upregulation of innate immune  
247 response-related genes was observed following re-infection with virus, although no alteration in  
248 expression of T cell- and B cell-related genes was observed. Overall, expression of more  
249 immune response-related modules was altered significantly in the CD3+ low group compared  
250 with the CD3+ high group, suggesting a difference in the magnitude of the immune response  
251 between the two groups following virus infection.

252

### 253 **Distribution of viral RNA in monkey tissues at the experimental end-point**

254 At the experimental end-point, tissue samples were also collected to detect viral  
255 RNA, subgenomic mRNA, and infectious virus (Fig. 6 and S6B Fig). Two monkeys (#5404 and  
256 #5417) euthanized at 7 days after initial inoculation had viral RNA and/or subgenomic mRNA

257 in the upper and lower lobe of the lungs. At 7 and 14 days after the second inoculation (R7d and  
258 R14d), two monkeys (#5412 and #5405) from the CD3+ low group had viral RNA and/or  
259 subgenomic mRNA in the lower lobe of the lungs and in the trachea. Monkey #5412 excreted  
260 the virus in rectal swabs (Fig. 3) and had detectable viral RNA and/or subgenomic mRNA in the  
261 large intestine and mesenteric lymph nodes at 7 days after the second inoculation. High levels of  
262 viral RNA were detected in the tonsil and subcarinal lymph nodes of monkeys in both the CD3+  
263 high and low groups at various time points. No infectious virus was isolated from tissue samples  
264 using TMPRSS2/VeroE6 cells. Because it was difficult to distinguish cytopathic effects (CPE)  
265 from cytotoxicity caused by the tissue homogenate, we performed blind passage of  
266 TMPRSS2/VeroE6 cells in the presence of culture supernatant from the first inoculation plus  
267 10% tissue homogenate; however, there were no distinct CPEs within 5 days p.i., after the  
268 second blind passage.

269 As mentioned above, we used a heterologous strain of the virus for the second  
270 infection. To identify single nucleotide variations and the major population of virus in monkey  
271 tissues, we used the next generation sequencer MiSeq to obtain the entire length of the viral  
272 genome. Thirteen RNA samples obtained from tonsil, mesenteric lymph nodes, and lung tissues  
273 from infected monkeys were used for analysis; however, four samples did not meet the quality  
274 standards. The read number obtained for six samples of tonsil and lung returned only partial  
275 viral genome sequences (S2 Table). In the end, only three samples were suitable for genome  
276 sequencing; the sequences obtained from these samples were compared with the Wuhan-Hu-1  
277 genome sequence (accession no. MN908947.3) as a reference (Table 2). The sequence data  
278 have been deposited in the DNA Data Bank of Japan (DDBJ) Sequence Read Archive, under

279 submission ID DRA011219 (BioSample accessions: SAMD00261559 – 00261561). In addition,

280 because the number of reads was sufficient at the D614G position (>200), a genetic population

281 analysis of the D614G variant was performed in six samples (S3 Table).

282

283 **Table 2. SARS-CoV-2 variants in tissue samples from monkeys after experimental infection**

| Group                  | Stain (Accession no.)                          | Nucleotide position, reference: Wuhan-Hu-1 (accession no. MN908947.3) |      |        |      |      |      |        |       |       |       |        |       |       |       |
|------------------------|------------------------------------------------|-----------------------------------------------------------------------|------|--------|------|------|------|--------|-------|-------|-------|--------|-------|-------|-------|
|                        |                                                | 1648                                                                  | 2662 | 4185   | 4456 | 5497 | 8782 | 11942  | 12334 | 13548 | 16596 | 18755  | 18804 | 21886 | 23403 |
| Region                 |                                                | ORF1a                                                                 |      |        |      |      |      |        | ORF1b |       |       |        | S     |       |       |
| Nonsynonymous mutation |                                                | -                                                                     | -    | G1307A | -    | -    | -    | Q3893* | -     | -     | -     | P1763L | -     | -     | D614G |
| 1st inoculum           | WK-521 (EPI_ISL_408667)                        | C                                                                     | T    | G      | C    | C    | T    | C      | A     | C     | C     | C      | C     | T     | A     |
| CD3+ high<br>at 7 dpi  | #5404_Tonsil<br>(SAMMD00261560)                | -                                                                     | -    | -      | -    | -    | -    | -      | -     | -     | -     | -      | -     | -     | -     |
| CD3+ low<br>at R7 dpi  | #5412_Lung<br>(SAMMD00261561)                  | T                                                                     | -    | -      | T    | T    | T    | -      | del   | T     | T     | T      | T     | -     | -     |
|                        |                                                | 100%*                                                                 |      |        | 100% | 62%  | 60%  |        | 100%  | 100%  | 100%  | 51%    | 50%   |       |       |
|                        | #5412_Mesenteric lymph node<br>(SAMMD00261559) | -                                                                     | -    | C      | -    | -    | -    | T      | -     | -     | -     | -      | -     | C     | -     |
|                        |                                                |                                                                       |      | 61%*   |      |      |      | 55%    |       |       |       |        |       | 100%  |       |
| 2nd inoculum           | QH-329-037 (EPI_ISL_529135)                    | -                                                                     | C    | -      | -    | -    | C    | -      | -     | -     | -     | -      | -     | -     | G     |

284 \*Percent nucleotide polymorphism; del, deletion.

285



286           The results revealed that the viral genome obtained from the tonsil of monkey #5404  
287 after initial inoculation did not harbor any mutations (threshold = 50%). However, the viral  
288 genome isolated from the lung of monkey #5412 harbored nine single nucleotide  
289 polymorphisms (SNPs), including seven silent point mutations, one deletion resulting in a  
290 frameshift mutation in the ORF1ab region, and a nonsynonymous mutation in ORF1b. The most  
291 common base change was C > T. In addition, the genome isolated from mesenteric lymph nodes  
292 from monkey #5412 harbored three SNPs, including two nonsynonymous mutations in the  
293 ORF1a region and a synonymous mutation in the S region. The major sequence in these two  
294 isolates was derived from WK-521, suggesting that the original inoculum replicated and resided  
295 in the respiratory tract and intestine of monkey #5412, even after the second inoculation with  
296 the heterologous strain. The viral genome obtained from the tonsil of monkey #5403 after the  
297 second inoculation harbored a D614G mutation in the S region, suggesting the presence of  
298 QH-329-037 in the tonsil after the 2nd inoculum (S3 Table). The viral genome also obtained  
299 from the tonsil of #5405 after the second inoculation harbored a D614G mutation in the S  
300 region, suggesting the presence of QH-329-037 in the tonsil. Interestingly, the genome obtained  
301 from the subcarinal lymph node of monkey #5405 did not harbor the D614G mutation,  
302 suggesting that the original inoculum was maintained in the accessory lymph node of the lungs.  
303 These results suggest that the initially inoculated virus (WK-521) was maintained in the lungs  
304 and/or accessory lymph nodes, and that the second inoculated virus (QH-329-037) was  
305 eliminated from the lungs of these monkeys soon after the second inoculation.

306

307 **Pathology of SARS-CoV-2 infection in cynomolgus monkeys inoculated with**

308 **SARS-CoV-2**

309 Gross pathology of lungs from monkeys at each end-point is shown in Fig. 7A.  
310 Obvious gross lung lesions observed in monkey #5417 at 7 days after the initial inoculation  
311 (Fig. 7A, red and white arrows). After the second inoculation, enlargement of the subcarinal  
312 lymph nodes was seen in three monkeys, except #5405 (Fig. 7A, yellow arrows).  
313 Histopathological analysis revealed varying degrees of alveolar damage in monkeys #5404 and  
314 #5417 at 7 days after the initial inoculation (Fig. 7B). Lung tissue from monkey #5404 showed  
315 multifocal, slight to mild, interstitial pneumonia, with mononuclear cell aggregates in the  
316 alveoli (Fig. 7B, upper row). Monkey #5417 developed more severe interstitial pneumonia, with  
317 pulmonary edema comprising degenerated cells and polymorphonuclear leukocytes (Fig. 7B,  
318 lower row). Proliferating type II cells overlying the pulmonary walls were observed within the  
319 lesions. CD3+ lymphocytes and CD68+ macrophages were present in the alveoli. The lesions in  
320 the lungs of monkey #5417 contained predominantly CD68+ macrophages rather than CD3+  
321 cells (Fig. 7C).  
322 Double immunohistochemistry revealed high expression of ACE2 on the surface of the  
323 pulmonary bronchi, but staining was very weak in the alveoli (S8 Fig, upper row); there was no  
324 merging of virus antigen (S8 Fig, brown) and ACE2 (S8 Fig, green) signals in either area. In  
325 addition, ACE2 was strongly expressed by hyperplastic type II pneumocytes in the pulmonary  
326 lesions (S8 Fig, lower row).  
327 Monkeys euthanized after the second inoculation had slight focal interstitial  
328 inflammation, with macrophages and lymphocytes in the alveoli but no evidence of viral  
329 antigens (S9 Fig).

330           Supplementary figure 10 shows representative examples of histopathology of the  
331   lungs and extrapulmonary organs. Hemophagocytes were seen in the alveoli and lymph nodes  
332   from monkey #5417, which showed severe anemia at 7 days p.i. (S10A Fig). Diffuse  
333   eosinophilic and plasma cell infiltration was seen in the mesenteric lymph nodes, small  
334   intestines and large intestine from monkey #5412, which showed prolonged viral excretion after  
335   initial infection (S10B Fig). No viral antigens were detected in extrapulmonary tissues.

336

## 337   **Discussion**

338           In our previous study of the SARS-CoV HKU39849 isolate, we inoculated six  
339   cynomolgus monkeys via the intranasal, intragastric, intravenous, or intratracheal routes and  
340   found that only intratracheal inoculation with  $10^8$  TCID<sub>50</sub> virus in 5 mL of medium induced  
341   acute pneumonia [31]. A low dose ( $10^3$  TCID<sub>50</sub> in 3.5 mL) administered intranasally failed to  
342   establish an infection, whereas a high dose ( $10^6$  TCID<sub>50</sub> in 3.5 mL) succeeded; indeed, infection  
343   was detected in nasal and throat swabs within 7 days post-inoculation. In addition, an  
344   epidemiological study suggests that COVID-19-associated conjunctivitis is a possible  
345   transmission route for SARS-CoV-2 [32]. Therefore, in this study we used a combined  
346   inoculation protocol comprising the nasal, intratracheal, and conjunctive routes, and used a high  
347   titer of SARS-CoV-2. Shed virus was detected in the upper respiratory and intestinal tracts of  
348   infected monkeys, but not consistently (even in nasal and throat swabs); however, one monkey  
349   from the CD3+ low group showed prolonged shedding of virus in rectal swabs. Other macaque  
350   models infected with clinical isolates of SARS-CoV-2 show similar results [20, 33]. One of  
351   these studies showed that viral RNA levels in throat and nasal swabs from young cynomolgus

352 monkeys peaked at Day 1 or 2 post-inoculation; however, they peaked at Day 4 in older  
353 monkeys [20]. A few conjunctival swab samples were positive for viral RNA, but not for  
354 subgenomic mRNA; in addition, none of the monkeys developed obvious conjunctivitis during  
355 the observation period in this study. Taken together, these data suggest that a combination of the  
356 intranasal and intratracheal routes (at least) might be appropriate for vaccine studies. In  
357 addition, a previous study suggests that the presence of subgenomic mRNA in throat and/or  
358 nasopharyngeal swabs should be considered when testing vaccine efficacy [34]. Our own study  
359 using young adult cynomolgus monkeys suggests that peripheral T lymphocytes (CD3+) are  
360 associated with pneumonia severity. Thus, it is important to consider both the age of the  
361 individual and T cell population when selecting animals for vaccine studies [18].

362           Peripheral blood lymphocyte subsets in humans are affected by factors such as  
363 gender, age, and ethnicity, and by lifestyle factors such as stress [35]. In this study, we used  
364 young healthy monkeys, which showed a wide range of peripheral CD3+ cells. The immune  
365 system of non-human primates may also be affected by environmental and physiological  
366 conditions [36, 37].

367           According to an epidemiological study of COVID-19, about 10% of the global  
368 population may be infected by October 2020; however, most infected people are asymptomatic  
369 or mildly symptomatic [38]. That said, some people develop severe pneumonia resulting in  
370 respiratory failure, sepsis, and even death (the current fatality rate is 0.15–0.20%). Similar to  
371 SARS-CoV and MERS-CoV, older age is a risk factor for severe SARS-CoV-2. Whereas  
372 absolute lymphopenia is not specific to COVID-19, low CD3+, CD4+, and CD8+ T cell counts  
373 in peripheral blood have been observed in severe cases of COVID-19 [39]. These cases also

374 present with comorbidities such as chronic underlying diseases. Zheng et al. reported that the  
375 total CD3<sup>+</sup> count is lower in both mild and severe cases of COVID-19 than in healthy controls,  
376 but that CD3<sup>+</sup>, CD8<sup>+</sup>, and NK cell counts are significantly lower in severe cases [40]. In  
377 addition, functional exhaustion (e.g., reduction of CD107a expression and IFN- $\gamma$ , IL-2, and  
378 TNF- $\alpha$  production by CTLs and NK cells) occurred in severe cases.

379 Murine models of SARS-CoV and MERS-CoV infection suggest that failure to  
380 induce an early IFN-I response leads to severe pathology and disease [41, 42]. Sera from  
381 hospitalized COVID-19 patients show reduced IFN-I and -III levels in response to  
382 SARS-CoV-2, but a significant increase in inflammatory chemokines and cytokines [43]. In the  
383 current study, transcriptome analysis revealed that innate anti-viral immune responses occurred  
384 during the early phase of infection in both the CD3<sup>+</sup> high and low groups. In both groups, IRF2,  
385 which regulates type I IFN production, was activated during the early phase of infection and  
386 upon re-infection. However, in the CD3<sup>+</sup> low group, inflammation overwhelmed the T cell  
387 response. This is supported by the kinetics of T cell-associated cytokine and chemokine  
388 production in monkey sera. Thus, a strong inflammatory response, coupled with a weak/delayed  
389 T cell response, was critical for the development of more severe SARS-CoV-2 in the CD3<sup>+</sup> low  
390 group. By contrast, an early type I IFN-related innate immune response controlled viral  
391 replication and dispersion at an early stage in the CD3<sup>+</sup> high group.

392 On Days 7–10 after the initial inoculation, two monkeys from the CD3<sup>+</sup> low group  
393 became lethargic, with decreased hemoglobin levels and RBC counts suggestive of severe  
394 anemia. In some cases of COVID-19, low hemoglobin levels indicate anemia [2, 44-46]. The  
395 mechanism underlying anemia in COVID-19 patients is unclear; however, virus infection and

396 inflammation impact iron metabolism [47-49]. Levels of serum ferritin, an intracellular protein  
397 that maintains iron levels, mirror the degree of inflammation in infectious diseases. In this  
398 study, we did not measure ferritin levels in blood from infected monkeys; however, studies  
399 show that hospitalized COVID-19 patients have high ferritin levels [2, 46]. The impact of  
400 anemia and high ferritin levels on outcome after SARS-CoV-2 infection is unclear [45]. In this  
401 study, one of two monkeys (#5417) with anemia that was sacrificed for planned autopsy showed  
402 severe acute pneumonia and hemophagocytes in the cervical lymph nodes. Another (#5412)  
403 showed extreme lethargy and anemia on Day 10; however, the monkey ate a piece of apple  
404 despite showing loss of appetite. Therefore, we continued to observe this animal until recovery  
405 within 14 days p.i., at which point seroconversion occurred. Monkey #5412 showed a low  
406 clinical score and excreted infectious virus from intestine for 3 weeks.

407 Pathological evaluation revealed varying degrees of virus infection and host response  
408 in the lungs of SARS-CoV-2-infected monkeys at 7 days p.i. Morphologically, SARS-CoV-2  
409 replicated in epithelial cells in the pulmonary bronchus and alveoli of monkey #5404, resulting  
410 in mild pneumonia. Similar to SARS-CoV infection, expression of ACE2 and SARS-CoV  
411 antigen-positive cells did not overlap [50]. In a severe case (monkey #5417), pulmonary edema  
412 was observed, suggesting severe damage to pneumocytes. The pathological features were early  
413 stage diffuse alveolar damage, with hyaline membranes and a few multinucleated giant cells,  
414 similar to human cases of SARS and COVID-19 [7, 9, 11, 51-53]. Activated macrophages  
415 rather than lymphocytes were seen in the alveoli of monkey #5417, suggesting that massive  
416 inflammatory reactions were induced in the lungs. Lack of an active immune response and  
417 epithelial regeneration results in a poor outcome [51]. In this study, we used young monkeys;

418 many regenerated type II cells were seen in the lungs of monkey #5417, and high levels of  
419 seroconversion occurred in monkey #5412, even from CD3+ low groups.

420 Most infected people are asymptomatic or show mild symptoms during SARS-CoV-2 infection;  
421 thus some researchers wonder whether SARS-CoV-2 infection triggers protective immunity  
422 against re-infection [54]. A rhesus macaque model clarified that SARS-CoV-2 infection results  
423 in protective immunity against re-infection [55]. The latest study reporting human cases of  
424 COVID-19 indicate that the neutralizing antibodies against SARS-CoV-2 last only for a few  
425 months [56]. The results of the present study suggest the magnitude of neutralizing antibody  
426 titers in infected monkeys is dependent on disease severity, similar to human cases [56]. In  
427 addition, these monkeys developed a rapid immune response against a second infection with  
428 another challenge strain. NK cell and IL-17 responses, suggesting involvement of Th17 cells,  
429 were stronger after the second infection than after the initial infection. Transcriptome analysis  
430 revealed that upregulation of innate immune responses, rather than T and B cell responses, in  
431 the CD3+ low group contributed to a marked reduction in viral replication and less severe  
432 pathology, even after a second infection. Seroconversion in monkeys is common after acute  
433 virus infections; indeed, we found virus-specific IgM, IgG, and IgA antibodies in the sera. IgM  
434 antibodies appeared together with IgG and, later, IgA; however, titers decreased within 3 weeks  
435 after inoculation. This result is similar to that of a human cohort study reporting co-induction of  
436 IgM and IgG during SARS-CoV infection [57]. SARS-CoV-2-specific IgG antibodies are  
437 predominantly specific for the S-/RBD- and N proteins. IgG levels in symptomatic groups are  
438 significantly higher than those in asymptomatic groups during the acute phase [58].  
439 Asymptomatic cases also show lower levels of pro- and anti-inflammatory cytokines. Similar to

440 human cases of COVID-19, our monkeys showed different immune responses and even  
441 seroconversion. After the second inoculation, all monkeys generated high titers of virus-specific  
442 IgA and IgG, suggesting re-infection.

443           In this study, we used two clinical isolates of SARS-CoV-2, one from East Asia and  
444 one from Europe. After identification of the first case of COVID-19 in Japan on January 15,  
445 2020, an epidemiological study of the SARS-CoV-2 genome revealed that the primary clusters  
446 identified in January and February in Japan were related to the Wuhan-Hu-1 isolates from China  
447 [59]. Soon after the primary wave from China, we faced a second wave of COVID-19 cases  
448 caused by lineages imported by returnees from Europe and North America. Thus, we based the  
449 infection experiments in this study on the current situation in Japan. We found that previous  
450 infection with a Wuhan-Hu-1-related isolate of SARS-CoV-2 led to a less severe illness upon  
451 re-infection with a heterologous strain (an S-G614 variant from Europe).

452           We also determined the mutation patterns in SARS-CoV-2 isolates from the lung of  
453 monkey #5412 at 6 weeks after the initial inoculation. The most common base changes were C >  
454 T, which were synonymous variants in the ORF1ab region of the monkey isolate. This  
455 nucleotide substitution is common in SARS-CoV-2 genomes isolated from humans [60, 61]. C  
456 > T transitions are thought to be induced by cytosine deaminases [60].

457           Taken together, the data presented herein suggest that a low CD3+ T cell count in  
458 peripheral blood might be an important risk factor for more severe COVID-19. We  
459 acknowledge that the study has some limitations; the small number of monkeys (due to ethical  
460 reasons) in particular. However, the data suggest that the peripheral T lymphocyte population is  
461 associated with severity of pneumonia caused by SARS-CoV-2 infection.



## 462 **Materials and methods**

### 463 **Ethical statements**

464 All animal experiments complied with Japanese legislation (Act on Welfare and  
465 Management of Animals, 1973, revised in 2012) and guidelines under the jurisdiction of the  
466 Ministry of Education, Culture, Sports, Science and Technology, Japan (Fundamental  
467 Guidelines for Proper Conduct of Animal Experiment and Related Activities in Academic  
468 Research Institutions, 2006). Animal care, housing, feeding, sampling, observation, and  
469 environmental enrichment were performed in accordance with these guidelines. Every possible  
470 effort was made to minimize suffering. The protocols were approved by the committee of  
471 biosafety and animal handling and by the committee of ethical regulation of the National  
472 Institute of Infectious Diseases, Japan (authorization nos. 519004-I, -II, and -III for monkey  
473 experiments; authorization no. 119176 for rabbit immunizations). Each monkey was housed in a  
474 separate cage at the National Institute of Infectious Diseases, Japan, and all received standard  
475 primate feed and fresh fruit daily, and had free access to water. Each rabbit was housed in a  
476 separate cage at the National Institute of Infectious Diseases, Japan, and all received standard  
477 rabbit feed and had free access to water. Animal welfare was observed on a daily basis.  
478 Inoculation of monkeys with virus was conducted under ketamine-xylazine anesthesia  
479 (intramuscular injection of a mixture of 50 mg/mL ketamine and 20 mg/mL xylazine [2:1; 0.2  
480 mL/kg]). Sampling procedures were conducted under anesthesia (10 mg/kg ketamine;  
481 intramuscular injection). Monkeys were sacrificed under excess anesthesia with ketamine  
482 (intramuscular injection). Rabbits were sacrificed under excess anesthesia with pentobarbital  
483 sodium (64.8 mg/kg intravenous injection).

484

## 485 **Biological safety**

486 All work with SARS-CoV-2 was conducted under biosafety level-3 (BSL-3)  
487 conditions in the National Institute of Infectious Diseases, Japan. All experimental animals were  
488 handled in a biosafety level 3 animal facility in accordance with the guidelines of this  
489 committee (approval no. 19-60, 20-1). Animals were contained in a glovebox system in the  
490 ABSL-3 facility during experimental infection. All personnel used respiratory protection when  
491 handling infectious samples (respirator type N95). Surface disinfection was performed using  
492 80% ethanol, while liquids, solid waste, cages, and animal wastes were steam sterilized in an  
493 autoclave.

494

## 495 **Cells and viruses**

496 VeroE6/TMPRSS2 cells and SARS-CoV-2 human isolates were kindly prepared and  
497 provided by Dr. Shutoku Matsuyama and Dr. Makoto Takeda (Department of Virology III,  
498 National Institute of Infectious Diseases, Japan) [62]. Cells were cultured in Dulbecco's  
499 modified Eagle's medium (DMEM, low glucose (Sigma-Aldrich, St. Louis, MO)) containing  
500 5% fetal bovine serum (FBS), 50 IU/mL penicillin G, and 50 µg/mL streptomycin (5DMEM).  
501 The virus strains used in this study are shown in Table 1. Stocks of the  
502 2019-nCoV/Japan/TY/WK-521/2020 isolate (refer as WK-521) of SARS-CoV-2 (accession no.  
503 EPI\_ISL\_408667) and the hCoV-19/Japan/QH-329-037/2020 isolate (refer as QH-329-037)  
504 were propagated eight times or twice, respectively, and titrated on VeroE6/TMPRSS2 cells in  
505 DMEM containing 2% FBS (2DMEM).

506 Whole-genome amplification of strain QH-329-037 was carried out using the  
507 modified version of ARTIC Network's protocol for SARS-CoV-2 genome sequencing by  
508 replacing some of the primers for multiplex PCR [63]. A next generation sequencing (NGS)  
509 library was constructed using the QIAseq FX DNA library kit (Qiagen, Hilden, Germany) and  
510 sequenced using the NextSeq 500 platform (Illumina, San Diego, CA). NGS reads were mapped  
511 to the SARS-CoV-2 Wuhan-Hu-1 reference genome sequence (GenBank accession no.  
512 MN908947) using `bwa mem` [64], followed by trimming the primer region by  
513 "`trim_primer_parts.py`" ([https://github.com/ItokawaK/Alt\\_nCov2019\\_primers](https://github.com/ItokawaK/Alt_nCov2019_primers)). For  
514 determination of the nearly full-length genome sequence, the trimmed reads were assembled  
515 using `A5-miseq v.20140604` [65]. The full genome sequence of strain QH-329-037 has been  
516 deposited in the Global Initiative on Sharing All Influenza Data database (GISAID) under  
517 accession ID EPI\_ISL\_529135.

518 To eradicate mycoplasma contamination, cells and strain WK-521 were treated with  
519 an anti-mycoplasma reagent, MC-210 (0.5 µg/mL; Waken, Kyoto, Japan). Mycoplasma  
520 contamination was confirmed by PCR using the TaKaRa PCR Mycoplasma Detection Set  
521 (Takara, Shiga, Japan).

522

### 523 **Animal experiments**

524 Twenty-five female adult cynomolgus macaques (*Macaca fascicularis*) imported  
525 from China were purchased from Hamri Co., Ltd (Ibaraki, Japan) in 2018 and maintained in the  
526 animal facility of the National Institute of Infectious Diseases, Japan. At around 4 weeks before  
527 experimental infection, blood samples were collected from all animals under anesthesia with

528 ketamine (intramuscular injection) (Fig. 1A). Sera were used for neutralization assays against  
529 SARS-CoV-2. Ethylenediaminetetraacetic acid (EDTA) blood samples were used for  
530 hematologic tests and flow cytometry analysis. Six monkeys (young adult females, 5 years old)  
531 were selected for experimental infection with SARS-CoV-2. At 14 days before inoculation with  
532 the virus, a small implantable thermo logger (DST micro-T: 8.3 × 25.4 mm; Star-oddi,  
533 Gardabaer, Iceland) was set intraperitoneally under ketamine anesthesia. The loggers were  
534 retrieved at necropsy. Six monkeys were transferred to the animal facility at biosafety level 3  
535 and allowed to acclimatize for 1 week. The animals were observed daily for clinical signs  
536 (dietary intake, including pellets and fruits, drinking, attitude in front of regular observers, and  
537 stool consistency) using a standardized scoring system until the end of the study. Scoring was  
538 performed as follows: daily intake of pellets (0–5), fruits including orange and apple (0–5), and  
539 drinking water (0–5), attitude in front of regular observers (i.e., standing up, show interest in the  
540 outside, getting attention, intimidation, up and down movement: 0–5), stool consistency (color,  
541 stiffness, form, volume, frequency: 0–5). The total score was the sum of all five component  
542 scores.

543           The six monkeys were anaesthetized by intramuscular injection of a mixture of 50  
544 mg/mL ketamine and 20 mg/mL xylazine (2:1; 0.2 mL/kg). After collecting samples, including  
545 blood and swabs, monkeys were inoculated with an isolate of SARS-CoV-2 (WK-521) via the  
546 intranasal (0.125 mL, sprayed into the right nostril; Keytron, Ichikawa, Japan), conjunctival (0.1  
547 mL dropped into the right eye), and intratracheal (1 mL of virus solution plus 2 mL of saline via  
548 a catheter; 6Fr; Atom Medical, Tokyo, Japan) routes (all three routes combined). On Days 0, 1,  
549 4, 7, 10, 14, 21, 28, and 35 after initial virus inoculation, clinical samples (conjunctiva, nasal,

550 throat, and rectal swabs, and blood samples) were collected after monkeys were weighed under  
551 anesthesia. Two animals were euthanized at 7 days post-initial inoculation, and four animals  
552 were re-inoculated with another isolate of SARS-CoV-2 (QH-329-037) at 35 days p.i. After  
553 re-inoculation, two animals were euthanized at 7 days post-second inoculation (R7 days p.i.),  
554 and the remaining two were euthanized at R14 days p.i. Clinical samples were collected at R1,  
555 R4, R7, R10, and R14 days p.i.

556

### 557 **Virus titration**

558 Tissue samples in Lysing Matrix tubes containing beads (Lysing Matrix A; MP  
559 Biomedicals, Irvine, CA) were homogenized using a mini Bead-Beater (Biospec Products,  
560 Bartlesville, OK) at 100 rpm for 30 sec (twice), and then diluted in 2×DMEM to yield 10%  
561 homogenates. After centrifugation at  $10,000 \times g$  for 1 min at 4°C, the supernatants were used for  
562 titration on VeroE6/TMPRSS2 cells. Swab samples were also used for titration. Inoculated cells  
563 were assessed for CPE at 5 days p.i. The detection limit was  $10^{1.5}$  TCID<sub>50</sub>/mL 10% tissue  
564 homogenate or swab sample.

565

### 566 **Real-time RT-PCR of SARS-CoV genome and detection of viral sequence**

567 Total RNA was extracted from 100 µL swab samples, tissue homogenates, or blood  
568 samples using a TRIzol™ Plus RNA Purification Kit (Thermo Fisher Scientific, Waltham, MA)  
569 and used to quantify the SARS-CoV-2 genome. On-column PureLink DNase (Thermo Fisher  
570 Scientific) treatment was performed during RNA purification, and RNA samples were dissolved  
571 in 30 µL RNase-free water. The viral RNA copy number in samples from monkeys was

572 estimated by real-time RT-PCR [66]. Subgenomic viral RNA transcripts were also detected in N  
573 gene transcripts. The primer and probe sets are shown in S4 Table. Real-time RT-PCR was  
574 performed using the QuantiTect Probe RT-PCR Kit (QuantiTect, Qiagen, Venlo, Netherlands)  
575 and a LightCycler 480 (Roche, Basal, Switzerland) or Mx3005P (Stratagene, La Jolla, CA)  
576 apparatus. The thermal cycling conditions were as follows: 50°C for 30 min, 95°C for 15 min,  
577 and 45 cycles at 95°C for 15 s and 60°C for 1 min (N2 primer and probe set); or 50°C for 30  
578 min, 95°C for 15 min, and 40 cycles of 94°C for 15 s and 60°C for 1 min (N1 set and the  
579 sgRNA transcript primer and probe sets).

580           Some samples containing high viral RNA copy numbers were sent for viral sequence  
581 analysis by gene analysis services (Takara Bio, Shiga, Japan). The next generation sequencing  
582 (NGS) library was prepared using the SuperScript IV First-Strand Synthesis System (Thermo  
583 Fisher Scientific), Q5 Hot Start DNA Polymerase (New England Biolabs, Ipswich, MA), and  
584 the QIAseq FX DNA Library Kit (Qiagen). The viral genome region was amplified specifically  
585 by multiplex PCR [63], and the entire sequence of the viral genome was obtained using the next  
586 generation sequencer MiSeq (Illumina, San Diego, CA) with a read length of 250 nt. FASTQ  
587 data were imported into the CLC Genomics Workbench (version 11, Qiagen), and the sequence  
588 reads were aligned to the reference sequence Wuhan-Hu-1 (accession no. MN908947.3). The  
589 threshold variant frequency was 50%. The amino acid substitutions were analyzed on  
590 NextClade (<https://clades.nextstrain.org/>). Genome sequences were deposited in the DNA Data  
591 Bank of Japan (DDBJ) (<https://www.ddbj.nig.ac.jp/index.html>).

592

593 **Hematological analysis**

594 Complete blood cell counts, hematocrit, and hemoglobin levels in peripheral blood  
595 collected in EDTA tubes were measured by an autoanalyzer (VetScan HM2; ABAXIS, Union  
596 City, CA). Neutrophil, lymphocyte, monocyte, eosinophil, and basophil counts were measured  
597 by microscopic analysis. Blood biochemistry (Glob, ALB, glucose, alkaline phosphatase (ALP),  
598 and blood urea nitrogen (BUN)) of lithium-heparin treated whole blood samples was analyzed  
599 using the VetScan VS2 (ABAXIS).

600

### 601 **Flow cytometric analyses**

602 Flow cytometry analysis was conducted to determine the number of T, B, NK,  
603 CD4+, and CD8+ cells in peripheral blood samples from monkeys. Cell staining was performed  
604 using the NHP T/B/NK Cell Cocktail (Becton Dickinson (BD) Company, Franklin Lakes, NJ)  
605 and the NHP T Lymphocyte Cocktail (BD), according to the manufacturer's instructions. After  
606 treatment with BD FACS lysing solution (BD), samples were analyzed by flow cytometry using  
607 a BD FACSCanto II analyzer (BD). Flow cytometry data were analyzed using FlowJo software  
608 (v10.7.1, FlowJo LLC, Ashland, OR).

609

### 610 **Histopathology and immunohistochemistry**

611 Animals were euthanized by exsanguination under excess ketamine anesthesia and  
612 then necropsied. Tissue samples were immersed in 10% phosphate-buffered formalin,  
613 embedded in paraffin, sectioned, and stained with hematoxylin and eosin.  
614 Immunohistochemical analysis was performed using a polymer-based detection system  
615 (Nichirei-Histofine Simple Stain Human MAX PO®; Nichirei Biosciences, Inc., Tokyo, Japan).

616 Antigen retrieval from formalin-fixed monkey tissue sections was performed by autoclaving in  
617 retrieval solution (pH 6.0; Nichirei Biosciences) at 121°C for 10 min. Hyper-immune rabbit  
618 serum raised against the GST-tagged N protein of SARS-CoV-2 (produced in-house) was used  
619 as the primary antibody to detect viral antigens. Peroxidase activity was detected with  
620 3,3'-diaminobenzidine (Sigma-Aldrich, St. Louis, MO). Hematoxylin was used for  
621 counterstaining. The polyclonal antibody against GST-tagged N protein of SARS-CoV-2 was  
622 prepared as follows: first, the recombinant N protein was constructed by inserting the N gene of  
623 SARS-CoV-2 into the pGEX-6P vector (GenScript Japan, Tokyo, Japan). Next, the amino acid  
624 sequence was optimized to the bacterial codon. The vector was then used to transform  
625 *Escherichia coli* strain BL21 (Takara Bio, Shiga, Japan). Expression of the GST-N protein of  
626 SARS-CoV-2 was induced by isopropyl-D-1-thiogalactopyranoside (0.3 mM IPTG, Takara  
627 Bio). The cell pellets were sonicated, and the inclusion bodies containing the fusion protein  
628 were collected. The fusion proteins were extracted from SDS-PAGE gels after reverse staining  
629 (AE-1310 EzStain Reverse, Atto, Tokyo, Japan), concentrated using a spin column (Pall  
630 centrifugal device 0.2 µm, Pall Corporation, Port Washington, NY), and diluted in PBS using  
631 Amicon Ultra-0.5mL Centrifugal Filters (Ultracel-50k). Two New Zealand White rabbits (1.5  
632 kg < body weight; female; SLC, Shizuoka, Japan) were immunized (four times at 2-week  
633 intervals) with the purified protein conjugated to TiterMax Gold (Sigma-Aldrich). Rabbits were  
634 sacrificed under excess anesthesia with pentobarbital sodium (64.8 mg/kg), and whole blood  
635 was collected by cardiac puncture using an 18 G needle. After separating sera by centrifugation,  
636 IgG was purified from the rabbit serum using a Melon Gel IgG Spin Purification Kit (Thermo  
637 Fisher Scientific) and then used for immunohistochemistry.



638

### 639 **Neutralization assay**

640           During the observation period, blood was obtained under anesthesia with ketamine.  
641    Serum samples were collected by centrifugation and inactivated by heating to 56°C for 30 min.  
642    Serum samples were titrated (in duplicate) from 1:10 to 1:1280 in 96-well plates and reacted  
643    with 100 TCID<sub>50</sub> of SARS-CoV-2 (WK-521 or QH-329-037) at 37°C for 1 h before addition of  
644    VeroE6/TMPRSS2 cells. Cells were incubated at 37°C for 5 days and examined twice for  
645    evidence of viral CPEs. The neutralizing antibody titer was determined as the reciprocal of the  
646    highest dilution at which no CPE was observed.

647

### 648 **ELISAs**

649           To assess the specificity of the IgM, IgA, and IgG antibodies produced by the  
650    infected monkeys, recombinant SARS-CoV-2 trimeric spike, RBD, or nucleocapsid protein  
651    were used as antigens in ELISAs. Briefly, 96-well assay plates (Corning Inc., Corning, NY)  
652    were coated overnight at 4°C with 50 ng recombinant protein in coating buffer (pH 9.6). The  
653    serum samples were serially diluted (4-fold from 1:400 to 1:409600) in 5% skim milk in PBS  
654    (pH 7.2) containing 0.05% Tween 20 (Sigma-Aldrich) (PBS-T). The well contents were  
655    discarded and diluted serum samples were added to the plate. After incubation for 1 h at 37°C,  
656    the plate was washed three times with PBS-T. The wells were then incubated with an  
657    HRP-conjugated goat anti-monkey IgM antibody (KPL #5220-0334, SeraCare Life Sciences,  
658    Inc. Milford, MA, 1/5000, 50 µL/well), an HRP-conjugated goat anti-monkey IgA antibody  
659    ((KPL #5220-0332, SeraCare Life Sciences, 1/5000, 50 µL/well), or an HRP-conjugated goat

660 anti-monkey IgG heavy and light chain antibody (A140-102P, 1/10000, 50  $\mu$ L/well, Thermo  
661 Fisher Scientific) in 5% skim milk in PBS-T for 1 h at 37°C. After three washes with PBS-T, an  
662 ABTS substrate (Roche, Basel, Switzerland) was added to the wells, and the plates were  
663 incubated for 30 min at room temperature. The optical density (OD) of each well was measured  
664 at 405 nm using a microplate reader (Model 680, Bio-Rad). The mean OD value plus three  
665 standard deviations ( $2 \times \text{mean} + 3 \times \text{SD}$ ) was calculated using serum samples from pre-infected  
666 monkeys and was used as the cut-off for the Ig ELISAs.

667

#### 668 **Detection of inflammatory cytokines and chemokines**

669 All serum samples tested in the BSL2 laboratory (all of which were confirmed  
670 negative for viral RNA by RT-PCR) were irradiated for 1 min with UV-C light. Cytokine and  
671 chemokine levels in monkey sera were measured using a MILLIPLEX MAP Non-Human  
672 Primate Cytokine Magnetic Bead Panel - Premixed 23 Plex - Immunology (Milliplex MAP kit,  
673 Merck Millipore, Burlington, MA), which includes the following 23 cytokines and chemokines:  
674 G-CSF, granulocyte macrophage colony-stimulating factor (GM-CSF), interferon gamma  
675 (IFN- $\gamma$ ), IL-1ra, IL-1 $\beta$ , IL-2, IL-4, IL-5, IL-6, IL-8, IL-10, IL-12/23 (p40), IL-13, IL-15, IL-17,  
676 IL-18, monocyte chemoattractant protein-1 (MCP-1), macrophage inflammatory protein 1 alpha  
677 (MIP-1 $\alpha$ ), MIP-1 $\beta$ , sCD40L, transforming growth factor alpha (TGF- $\alpha$ ), tumor necrosis factor  
678 alpha (TNF- $\alpha$ ), and vascular endothelial growth factor. The assay samples were read on a  
679 Luminex 200™ instrument with xPONENT software (Merck Millipore), as described by the  
680 manufacturer.

681

## 682 **RNA sequencing and data analyses**

683 Whole blood was collected from animals at multiple time points using PAXgene  
684 Blood RNA Tubes (PreAnalytiX, Hombrechtikon, Switzerland). Tubes were frozen at -80°C  
685 until RNA extraction. RNA was extracted using PAXgene Blood RNA Kits (PreAnalytiX) and  
686 shipped to Macrogen Corp. Japan (Kyoto, Japan) for NGS sequencing. Next, cDNA libraries  
687 were prepared using a TruSeq Stranded Total RNA LT Sample Prep Kit (Illumina) in  
688 accordance with the TruSeq Stranded Total RNA Sample Prep Guide (Part #15031048 Rev. E  
689 protocol). Next, the cDNA libraries were paired-end sequenced (read length = 101 bp) on a  
690 NovaSeq6000 sequencer (Illumina). Raw FASTQ files were quality checked using fastqc  
691 v0.11.8 [67], and low-quality bases from paired reads were trimmed using Trimmomatic v0.39  
692 [68]. Paired reads were aligned to the *Macaca fascicularis* genome (version 5.0, Ensembl release  
693 101) using the STAR aligner v2.7.3a [69] and default settings. Read fragments (paired reads  
694 only) were quantified per gene per sample using featureCounts v1.6.0 [70]. All raw RNA seq  
695 fastq files were uploaded to the DDBJ Sequence Read Archive (DRA accession number:  
696 DRA010881). All functional analyses of transcriptomic data were performed in the R statistical  
697 environment (v3.6.2). Significantly differentially expressed genes between samples collected  
698 before and after virus infection were identified using DESeq2 v1.26.0 [71] with default settings,  
699 and a minimum adjusted *P*-value significance threshold of 0.05. Volcano plots were created  
700 from shrunken log<sub>2</sub>-fold change values for each gene, calculated by DESeq2 (shrinkage type:  
701 normal). For the heatmaps, DESeq2-normalized counts per gene were plotted using the heatmap  
702 package [72]. Gene set enrichment analyses (GSEA) were conducted using tmod v0.44 [73],  
703 with count data normalized with the voom function within the limma package v3.42.2 [74].

704 GSEA (with default settings and a minimum *P*-value significance threshold of 0.01) was  
705 conducted between samples collected from animals in the CD3+ high and low groups after virus  
706 infection, and samples collected before and at multiple time points after virus infection.

707

## 708 **Statistical analysis**

709 Data are expressed as the mean and standard error of the mean. Statistical analyses  
710 were performed using Graph Pad Prism 8 software (GraphPad Software Inc., La Jolla, CA).  
711 Intergroup comparisons (i.e., changes in clinical scores, blood analysis results, and cytokine  
712 levels) were performed using Sidak's multiple comparisons test after application of  
713 mixed-effects models for repeated measures analysis. The correlation coefficient was evaluated  
714 by Spearman's correlation analysis of the neutralization and ELISA test results. A *P*-value of  
715 <0.05 was considered statistically significant.

716

## 717 **Acknowledgements**

718 We thank Dr Shutoku Matsuyama and Dr Makoto Takeda (National Institute of  
719 Infectious Disease) for providing VeroE6-TMPRSS2 cells and SARS-CoV-2 isolates. We also  
720 thank Dr Masayuki Shimojima, Dr. Hideki Asanuma, Dr Makoto Kuroda, Dr Takushi Nomura,  
721 Dr Hiroyuki Yamamoto, Dr Tetsuro Matano, Dr Shinji Watanabe (National Institute of  
722 Infectious Diseases), Dr Shintaro Shichinohe, and Dr Kensuke Nakajima (Nagasaki University,  
723 Nagasaki, Japan) for helpful discussion. We also thank our colleagues at the Institute, especially  
724 Ms Midori Ozaki, Ms Takiko Yoshida, Dr Michiyo Kataoka, Dr. Dai Izawa, and Ms Yuriko  
725 Suzaki, for technical assistance.

726

## 727 **References**

- 728 1. Zhu N, Zhang D, Wang W, Li X, Yang B, Song J, et al. A Novel Coronavirus  
729 from Patients with Pneumonia in China, 2019. *N Engl J Med.* 2020;382(8):727-33.  
730 Epub 2020/01/25. doi: 10.1056/NEJMoa2001017. PubMed PMID: 31978945; PubMed  
731 Central PMCID: PMC7092803.
- 732 2. Chen N, Zhou M, Dong X, Qu J, Gong F, Han Y, et al. Epidemiological and  
733 clinical characteristics of 99 cases of 2019 novel coronavirus pneumonia in Wuhan,  
734 China: a descriptive study. *Lancet.* 2020;395(10223):507-13. Epub 2020/02/03. doi:  
735 10.1016/S0140-6736(20)30211-7. PubMed PMID: 32007143.
- 736 3. Huang C, Wang Y, Li X, Ren L, Zhao J, Hu Y, et al. Clinical features of  
737 patients infected with 2019 novel coronavirus in Wuhan, China. *Lancet.*  
738 2020;395(10223):497-506. Epub 2020/01/28. doi: 10.1016/S0140-6736(20)30183-5.  
739 PubMed PMID: 31986264.
- 740 4. JHU. COVID-19 Dashboard by the Center for Systems Science and  
741 Engineering (CSSE) at Johns Hopkins University (JHU) 2020.
- 742 5. Chan JF, Yuan S, Kok KH, To KK, Chu H, Yang J, et al. A familial cluster of  
743 pneumonia associated with the 2019 novel coronavirus indicating person-to-person  
744 transmission: a study of a family cluster. *Lancet.* 2020;395(10223):514-23. Epub  
745 2020/01/28. doi: 10.1016/S0140-6736(20)30154-9. PubMed PMID: 31986261.
- 746 6. Mizumoto K, Kagaya K, Zarebski A, Chowell G. Estimating the  
747 asymptomatic proportion of coronavirus disease 2019 (COVID-19) cases on board the  
748 Diamond Princess cruise ship, Yokohama, Japan, 2020. *Euro Surveill.* 2020;25(10).  
749 Epub 2020/03/19. doi: 10.2807/1560-7917.ES.2020.25.10.2000180. PubMed PMID:  
750 32183930; PubMed Central PMCID: PMC7078829.
- 751 7. Adachi T, Chong JM, Nakajima N, Sano M, Yamazaki J, Miyamoto I, et al.  
752 Clinicopathologic and Immunohistochemical Findings from Autopsy of Patient with  
753 COVID-19, Japan. *Emerg Infect Dis.* 2020;26(9). Epub 2020/05/16. doi:  
754 10.3201/eid2609.201353. PubMed PMID: 32412897.
- 755 8. Martines RB, Ritter JM, Matkovic E, Gary J, Bollweg BC, Bullock H, et al.  
756 Pathology and Pathogenesis of SARS-CoV-2 Associated with Fatal Coronavirus  
757 Disease, United States. *Emerg Infect Dis.* 2020;26(9). Epub 2020/05/22. doi:

- 758 10.3201/eid2609.202095. PubMed PMID: 32437316.
- 759 9. Xu Z, Shi L, Wang Y, Zhang J, Huang L, Zhang C, et al. Pathological  
760 findings of COVID-19 associated with acute respiratory distress syndrome. *Lancet*  
761 *Respir Med*. 2020;8(4):420-2. Epub 2020/02/23. doi: 10.1016/S2213-2600(20)30076-X.  
762 PubMed PMID: 32085846; PubMed Central PMCID: PMC7164771.
- 763 10. Qin C, Zhou L, Hu Z, Zhang S, Yang S, Tao Y, et al. Dysregulation of  
764 Immune Response in Patients With Coronavirus 2019 (COVID-19) in Wuhan, China.  
765 *Clin Infect Dis*. 2020;71(15):762-8. Epub 2020/03/13. doi: 10.1093/cid/ciaa248.  
766 PubMed PMID: 32161940; PubMed Central PMCID: PMC7108125.
- 767 11. Nicholls JM, Poon LL, Lee KC, Ng WF, Lai ST, Leung CY, et al. Lung  
768 pathology of fatal severe acute respiratory syndrome. *Lancet*. 2003;361(9371):1773-8.  
769 Epub 2003/06/05. doi: 10.1016/s0140-6736(03)13413-7. PubMed PMID: 12781536;  
770 PubMed Central PMCID: PMC7112492.
- 771 12. Peiris JS, Chu CM, Cheng VC, Chan KS, Hung IF, Poon LL, et al. Clinical  
772 progression and viral load in a community outbreak of coronavirus-associated SARS  
773 pneumonia: a prospective study. *Lancet*. 2003;361(9371):1767-72. Epub 2003/06/05.  
774 doi: 10.1016/s0140-6736(03)13412-5. PubMed PMID: 12781535; PubMed Central  
775 PMCID: PMC7112410.
- 776 13. Wong CK, Lam CW, Wu AK, Ip WK, Lee NL, Chan IH, et al. Plasma  
777 inflammatory cytokines and chemokines in severe acute respiratory syndrome. *Clin Exp*  
778 *Immunol*. 2004;136(1):95-103. Epub 2004/03/20. doi:  
779 10.1111/j.1365-2249.2004.02415.x. PubMed PMID: 15030519; PubMed Central  
780 PMCID: PMC1808997.
- 781 14. Zhang Y, Li J, Zhan Y, Wu L, Yu X, Zhang W, et al. Analysis of serum  
782 cytokines in patients with severe acute respiratory syndrome. *Infect Immun*.  
783 2004;72(8):4410-5. Epub 2004/07/24. doi: 10.1128/IAI.72.8.4410-4415.2004. PubMed  
784 PMID: 15271897; PubMed Central PMCID: PMC710699.
- 785 15. Channappanavar R, Perlman S. Pathogenic human coronavirus infections:  
786 causes and consequences of cytokine storm and immunopathology. *Semin*  
787 *Immunopathol*. 2017;39(5):529-39. Epub 2017/05/04. doi: 10.1007/s00281-017-0629-x.  
788 PubMed PMID: 28466096; PubMed Central PMCID: PMC7079893.
- 789 16. Kim KD, Zhao J, Auh S, Yang X, Du P, Tang H, et al. Adaptive immune cells  
790 temper initial innate responses. *Nat Med*. 2007;13(10):1248-52. Epub 2007/09/25. doi:

- 791 10.1038/nm1633. PubMed PMID: 17891146; PubMed Central PMCID:  
792 PMCPMC2435248.
- 793 17. Lakdawala SS, Menachery VD. The search for a COVID-19 animal model.  
794 Science. 2020;368(6494):942-3. Epub 2020/05/30. doi: 10.1126/science.abc6141.  
795 PubMed PMID: 32467379.
- 796 18. Muñoz-Fontela C, Dowling WE, Funnell SGP, Gsell PS, Balta XR, Albrecht  
797 RA, et al. Animal models for COVID-19. Nature. 2020. Epub 2020/09/24. doi:  
798 10.1038/s41586-020-2787-6. PubMed PMID: 32967005.
- 799 19. Shi J, Wen Z, Zhong G, Yang H, Wang C, Huang B, et al. Susceptibility of  
800 ferrets, cats, dogs, and other domesticated animals to SARS-coronavirus 2. Science.  
801 2020;368(6494):1016-20. Epub 2020/04/10. doi: 10.1126/science.abb7015. PubMed  
802 PMID: 32269068; PubMed Central PMCID: PMCPMC7164390.
- 803 20. Rockx B, Kuiken T, Herfst S, Bestebroer T, Lamers MM, Oude Munnink BB,  
804 et al. Comparative pathogenesis of COVID-19, MERS, and SARS in a nonhuman  
805 primate model. Science. 2020;368(6494):1012-5. Epub 2020/04/19. doi:  
806 10.1126/science.abb7314. PubMed PMID: 32303590; PubMed Central PMCID:  
807 PMCPMC7164679.
- 808 21. Jiang RD, Liu MQ, Chen Y, Shan C, Zhou YW, Shen XR, et al. Pathogenesis  
809 of SARS-CoV-2 in Transgenic Mice Expressing Human Angiotensin-Converting  
810 Enzyme 2. Cell. 2020;182(1):50-8 e8. Epub 2020/06/10. doi:  
811 10.1016/j.cell.2020.05.027. PubMed PMID: 32516571; PubMed Central PMCID:  
812 PMCPMC7241398.
- 813 22. Gao Q, Bao L, Mao H, Wang L, Xu K, Yang M, et al. Development of an  
814 inactivated vaccine candidate for SARS-CoV-2. Science. 2020;369(6499):77-81. Epub  
815 2020/05/08. doi: 10.1126/science.abc1932. PubMed PMID: 32376603; PubMed Central  
816 PMCID: PMCPMC7202686.
- 817 23. Chan JF, Zhang AJ, Yuan S, Poon VK, Chan CC, Lee AC, et al. Simulation  
818 of the clinical and pathological manifestations of Coronavirus Disease 2019  
819 (COVID-19) in golden Syrian hamster model: implications for disease pathogenesis and  
820 transmissibility. Clin Infect Dis. 2020. Epub 2020/03/28. doi: 10.1093/cid/ciaa325.  
821 PubMed PMID: 32215622; PubMed Central PMCID: PMCPMC7184405.
- 822 24. Kim YI, Kim SG, Kim SM, Kim EH, Park SJ, Yu KM, et al. Infection and  
823 Rapid Transmission of SARS-CoV-2 in Ferrets. Cell Host Microbe. 2020;27(5):704-9

- 824 e2. Epub 2020/04/08. doi: 10.1016/j.chom.2020.03.023. PubMed PMID: 32259477;  
825 PubMed Central PMCID: PMCPMC7144857.
- 826 25. Imai M, Iwatsuki-Horimoto K, Hatta M, Loeber S, Halfmann PJ, Nakajima N,  
827 et al. Syrian hamsters as a small animal model for SARS-CoV-2 infection and  
828 countermeasure development. *Proc Natl Acad Sci U S A*. 2020;117(28):16587-95. Epub  
829 2020/06/24. doi: 10.1073/pnas.2009799117. PubMed PMID: 32571934; PubMed  
830 Central PMCID: PMCPMC7368255.
- 831 26. Hartman AL, Nambulli S, McMillen CM, White AG, Tilston-Lunel NL, Albe  
832 JR, et al. SARS-CoV-2 infection of African green monkeys results in mild respiratory  
833 disease discernible by PET/CT imaging and shedding of infectious virus from both  
834 respiratory and gastrointestinal tracts. *PLOS Pathogens*. 2020;16(9):e1008903. doi:  
835 10.1371/journal.ppat.1008903.
- 836 27. Roberts A, Paddock C, Vogel L, Butler E, Zaki S, Subbarao K. Aged BALB/c  
837 mice as a model for increased severity of severe acute respiratory syndrome in elderly  
838 humans. *J Virol*. 2005;79(9):5833-8. Epub 2005/04/14. doi:  
839 10.1128/JVI.79.9.5833-5838.2005. PubMed PMID: 15827197; PubMed Central  
840 PMCID: PMCPMC1082763.
- 841 28. Smits SL, de Lang A, van den Brand JM, Leijten LM, van IWF, Eijkemans  
842 MJ, et al. Exacerbated innate host response to SARS-CoV in aged non-human primates.  
843 *PLoS Pathog*. 2010;6(2):e1000756. Epub 2010/02/09. doi:  
844 10.1371/journal.ppat.1000756. PubMed PMID: 20140198; PubMed Central PMCID:  
845 PMCPMC2816697.
- 846 29. Nagata N, Saijo M, Kataoka M, Ami Y, Suzaki Y, Sato Y, et al. Pathogenesis  
847 of fulminant monkeypox with bacterial sepsis after experimental infection with West  
848 African monkeypox virus in a cynomolgus monkey. *Int J Clin Exp Pathol*.  
849 2014;7(7):4359-70. Epub 2014/08/15. PubMed PMID: 25120821; PubMed Central  
850 PMCID: PMCPMC4129056.
- 851 30. Wolfel R, Corman VM, Guggemos W, Seilmaier M, Zange S, Muller MA, et  
852 al. Virological assessment of hospitalized patients with COVID-2019. *Nature*.  
853 2020;581(7809):465-9. Epub 2020/04/03. doi: 10.1038/s41586-020-2196-x. PubMed  
854 PMID: 32235945.
- 855 31. Nagata N, Iwata N, Hasegawa H, Sato Y, Morikawa S, Saijo M, et al.  
856 Pathology and virus dispersion in cynomolgus monkeys experimentally infected with



- 857 severe acute respiratory syndrome coronavirus via different inoculation routes. *Int J Exp*  
858 *Pathol.* 2007;88(6):403-14. Epub 2007/11/28. doi: 10.1111/j.1365-2613.2007.00567.x.  
859 PubMed PMID: 18039277; PubMed Central PMCID: PMCPMC2517337.
- 860 32. Xia J, Tong J, Liu M, Shen Y, Guo D. Evaluation of coronavirus in tears and  
861 conjunctival secretions of patients with SARS-CoV-2 infection. *Journal of Medical*  
862 *Virology.* 2020;92(6):589-94. doi: 10.1002/jmv.25725.
- 863 33. Munster VJ, Feldmann F, Williamson BN, van Doremalen N, Perez-Perez L,  
864 Schulz J, et al. Respiratory disease in rhesus macaques inoculated with SARS-CoV-2.  
865 *Nature.* 2020. Epub 2020/05/13. doi: 10.1038/s41586-020-2324-7. PubMed PMID:  
866 32396922.
- 867 34. Yu J, Tostanoski LH, Peter L, Mercado NB, McMahan K, Mahrokhian SH, et  
868 al. DNA vaccine protection against SARS-CoV-2 in rhesus macaques. *Science.*  
869 2020;369(6505):806-11. Epub 2020/05/22. doi: 10.1126/science.abc6284. PubMed  
870 PMID: 32434945; PubMed Central PMCID: PMCPMC7243363.
- 871 35. Choi J, Lee SJ, Lee YA, Maeng HG, Lee JK, Kang YW. Reference values for  
872 peripheral blood lymphocyte subsets in a healthy korean population. *Immune Netw.*  
873 2014;14(6):289-95. Epub 2014/12/22. doi: 10.4110/in.2014.14.6.289. PubMed PMID:  
874 25550695.
- 875 36. Nehete PN, Shelton KA, Nehete BP, Chitta S, Williams LE, Schapiro SJ, et  
876 al. Effects of transportation, relocation, and acclimation on phenotypes and functional  
877 characteristics of peripheral blood lymphocytes in rhesus monkeys (*Macaca mulatta*).  
878 *PLOS ONE.* 2017;12(12):e0188694. doi: 10.1371/journal.pone.0188694.
- 879 37. Rosso MC, Badino P, Ferrero G, Costa R, Cordero F, Steidler S. Biologic  
880 Data of Cynomolgus Monkeys Maintained under Laboratory Conditions. *PloS one.*  
881 2016;11(6):e0157003-e. doi: 10.1371/journal.pone.0157003. PubMed PMID:  
882 27280447.
- 883 38. Ioannidis JPA. Global perspective of COVID-19 epidemiology for a  
884 full-cycle pandemic. *Eur J Clin Invest.* 2020:e13421. Epub 2020/10/08. doi:  
885 10.1111/eci.13423. PubMed PMID: 33026101.
- 886 39. Nazarullah A, Liang C, Villarreal A, Higgins RA, Mais DD. Peripheral Blood  
887 Examination Findings in SARS-CoV-2 Infection. *Am J Clin Pathol.*  
888 2020;154(3):319-29. Epub 2020/08/07. doi: 10.1093/ajcp/aqaa108. PubMed PMID:  
889 32756872; PubMed Central PMCID: PMCPMC7454310.

- 890 40. Zheng M, Gao Y, Wang G, Song G, Liu S, Sun D, et al. Functional  
891 exhaustion of antiviral lymphocytes in COVID-19 patients. *Cellular & Molecular*  
892 *Immunology*. 2020;17(5):533-5. doi: 10.1038/s41423-020-0402-2.
- 893 41. Channappanavar R, Fehr Anthony R, Vijay R, Mack M, Zhao J, Meyerholz  
894 David K, et al. Dysregulated Type I Interferon and Inflammatory  
895 Monocyte-Macrophage Responses Cause Lethal Pneumonia in SARS-CoV-Infected  
896 Mice. *Cell Host & Microbe*. 2016;19(2):181-93. doi:  
897 <https://doi.org/10.1016/j.chom.2016.01.007>.
- 898 42. Channappanavar R, Fehr AR, Zheng J, Wohlford-Lenane C, Abrahante JE,  
899 Mack M, et al. IFN-I response timing relative to virus replication determines MERS  
900 coronavirus infection outcomes. *The Journal of Clinical Investigation*.  
901 2019;129(9):3625-39. doi: 10.1172/JCI126363.
- 902 43. Blanco-Melo D, Nilsson-Payant BE, Liu W-C, Uhl S, Hoagland D, Møller R,  
903 et al. Imbalanced Host Response to SARS-CoV-2 Drives Development of COVID-19.  
904 *Cell*. 2020;181(5):1036-45.e9. doi: 10.1016/j.cell.2020.04.026.
- 905 44. Fan BE, Chong VCL, Chan SSW, Lim GH, Lim KGE, Tan GB, et al.  
906 Hematologic parameters in patients with COVID-19 infection. *American Journal of*  
907 *Hematology*. 2020;95(6):E131-E4. doi: 10.1002/ajh.25774.
- 908 45. Taneri PE, Gómez-Ochoa SA, Llanaj E, Raguindin PF, Rojas LZ, Roa-Díaz  
909 ZM, et al. Anemia and iron metabolism in COVID-19: a systematic review and  
910 meta-analysis. *European Journal of Epidemiology*. 2020;35(8):763-73. doi:  
911 10.1007/s10654-020-00678-5.
- 912 46. Richardson S, Hirsch JS, Narasimhan M, Crawford JM, McGinn T, Davidson  
913 KW, et al. Presenting Characteristics, Comorbidities, and Outcomes Among 5700  
914 Patients Hospitalized With COVID-19 in the New York City Area. *JAMA*.  
915 2020;323(20):2052-9. doi: 10.1001/jama.2020.6775.
- 916 47. Kernan KF, Carcillo JA. Hyperferritinemia and inflammation. *Int Immunol*.  
917 2017;29(9):401-9. Epub 2017/05/26. doi: 10.1093/intimm/dxx031. PubMed PMID:  
918 28541437; PubMed Central PMCID: PMC6743070.
- 919 48. Wessling-Resnick M. Crossing the Iron Gate: Why and How Transferrin  
920 Receptors Mediate Viral Entry. *Annu Rev Nutr*. 2018;38:431-58. Epub 2018/06/01. doi:  
921 10.1146/annurev-nutr-082117-051749. PubMed PMID: 29852086; PubMed Central  
922 PMCID: PMC6743070.

- 923 49. Cassat James E, Skaar Eric P. Iron in Infection and Immunity. *Cell Host &*  
924 *Microbe*. 2013;13(5):509-19. doi: 10.1016/j.chom.2013.04.010.
- 925 50. Matsuyama S, Nagata N, Shirato K, Kawase M, Takeda M, Taguchi F.  
926 Efficient activation of the severe acute respiratory syndrome coronavirus spike protein  
927 by the transmembrane protease TMPRSS2. *J Virol*. 2010;84(24):12658-64. Epub  
928 2010/10/12. doi: 10.1128/JVI.01542-10. PubMed PMID: 20926566; PubMed Central  
929 PMCID: PMC3004351.
- 930 51. Mason RJ. Pathogenesis of COVID-19 from a cell biology perspective.  
931 *European Respiratory Journal*. 2020;55(4):2000607. doi:  
932 10.1183/13993003.00607-2020.
- 933 52. Nakajima N, Asahi-Ozaki Y, Nagata N, Sato Y, Dizon F, Paladin FJ, et al.  
934 SARS coronavirus-infected cells in lung detected by new in situ hybridization  
935 technique. *Jpn J Infect Dis*. 2003;56(3):139-41. Epub 2003/08/29. PubMed PMID:  
936 12944688.
- 937 53. Martines R, Ritter J, Matkovic E, Gary J, Bollweg B, Bullock H, et al.  
938 Pathology and Pathogenesis of SARS-CoV-2 Associated with Fatal Coronavirus  
939 Disease, United States. *Emerging Infectious Disease journal*. 2020;26(9). doi:  
940 10.3201/eid2609.202095.
- 941 54. Ledford H. Coronavirus reinfections: three questions scientists are asking.  
942 *Nature*. 2020;585(7824):168-9. Epub 2020/09/06. doi: 10.1038/d41586-020-02506-y.  
943 PubMed PMID: 32887957.
- 944 55. Chandrashekar A, Liu J, Martinot AJ, McMahan K, Mercado NB, Peter L, et  
945 al. SARS-CoV-2 infection protects against rechallenge in rhesus macaques. *Science*.  
946 2020. Epub 2020/05/22. doi: 10.1126/science.abc4776. PubMed PMID: 32434946;  
947 PubMed Central PMCID: PMC7243369.
- 948 56. Seow J, Graham C, Merrick B, Acors S, Pickering S, Steel KJA, et al.  
949 Longitudinal observation and decline of neutralizing antibody responses in the three  
950 months following SARS-CoV-2 infection in humans. *Nature Microbiology*. 2020. doi:  
951 10.1038/s41564-020-00813-8.
- 952 57. Long QX, Liu BZ, Deng HJ, Wu GC, Deng K, Chen YK, et al. Antibody  
953 responses to SARS-CoV-2 in patients with COVID-19. *Nat Med*. 2020;26(6):845-8.  
954 Epub 2020/05/01. doi: 10.1038/s41591-020-0897-1. PubMed PMID: 32350462.
- 955 58. Long QX, Tang XJ, Shi QL, Li Q, Deng HJ, Yuan J, et al. Clinical and

- 956 immunological assessment of asymptomatic SARS-CoV-2 infections. *Nat Med.* 2020.  
957 Epub 2020/06/20. doi: 10.1038/s41591-020-0965-6. PubMed PMID: 32555424.
- 958 59. Sekizuka T, Itokawa K, Hashino M, Kawano-Sugaya T, Tanaka R, Yatsu K,  
959 et al. A genome epidemiological study of SARS-CoV-2 introduction into Japan.  
960 medRxiv. 2020:2020.07.01.20143958. doi: 10.1101/2020.07.01.20143958.
- 961 60. Koyama T, Platt D, Parida L. Variant analysis of SARS-CoV-2 genomes. *Bull*  
962 *World Health Organ.* 2020;98(7):495-504. Epub 2020/08/04. doi:  
963 10.2471/BLT.20.253591. PubMed PMID: 32742035; PubMed Central PMCID:  
964 PMCPMC7375210.
- 965 61. Rouchka EC, Chariker JH, Chung D. Variant analysis of 1,040 SARS-CoV-2  
966 genomes. *PLoS One.* 2020;15(11):e0241535. Epub 2020/11/06. doi:  
967 10.1371/journal.pone.0241535. PubMed PMID: 33152019; PubMed Central PMCID:  
968 PMCPMC7643988.
- 969 62. Matsuyama S, Nao N, Shirato K, Kawase M, Saito S, Takayama I, et al.  
970 Enhanced isolation of SARS-CoV-2 by TMPRSS2-expressing cells. *Proc Natl Acad Sci*  
971 *U S A.* 2020;117(13):7001-3. Epub 2020/03/14. doi: 10.1073/pnas.2002589117.  
972 PubMed PMID: 32165541; PubMed Central PMCID: PMCPMC7132130.
- 973 63. Itokawa K, Sekizuka T, Hashino M, Tanaka R, Kuroda M. Disentangling  
974 primer interactions improves SARS-CoV-2 genome sequencing by multiplex tiling  
975 PCR. *PLoS One.* 2020;15(9):e0239403. Epub 2020/09/19. doi:  
976 10.1371/journal.pone.0239403. PubMed PMID: 32946527; PubMed Central PMCID:  
977 PMCPMC7500614.
- 978 64. Li H, Durbin R. Fast and accurate short read alignment with  
979 Burrows-Wheeler transform. *Bioinformatics.* 2009;25(14):1754-60. Epub 2009/05/20.  
980 doi: 10.1093/bioinformatics/btp324. PubMed PMID: 19451168; PubMed Central  
981 PMCID: PMCPMC2705234.
- 982 65. Coil D, Jospin G, Darling AE. A5-miseq: an updated pipeline to assemble  
983 microbial genomes from Illumina MiSeq data. *Bioinformatics.* 2015;31(4):587-9. Epub  
984 2014/10/24. doi: 10.1093/bioinformatics/btu661. PubMed PMID: 25338718.
- 985 66. Shirato K, Nao N, Katano H, Takayama I, Saito S, Kato F, et al. Development  
986 of Genetic Diagnostic Methods for Novel Coronavirus 2019 (nCoV-2019) in Japan. *Jpn*  
987 *J Infect Dis.* 2020. Epub 2020/02/20. doi: 10.7883/yoken.JJID.2020.061. PubMed  
988 PMID: 32074516.

- 989 67. Babraham AS. Bioinformatics - FastQC A Quality Control tool for High  
990 Throughput Sequence Data [cited 24 Sep 2020]. Available from:  
991 <https://www.bioinformatics.babraham.ac.uk/projects/fastqc/>.
- 992 68. Bolger AM, Lohse M, Usadel B. Trimmomatic: a flexible trimmer for  
993 Illumina sequence data. *Bioinformatics*. 2014;30(15):2114-20. Epub 2014/04/04. doi:  
994 10.1093/bioinformatics/btu170. PubMed PMID: 24695404; PubMed Central PMCID:  
995 PMC4103590.
- 996 69. Dobin A, Davis CA, Schlesinger F, Drenkow J, Zaleski C, Jha S, et al. STAR:  
997 ultrafast universal RNA-seq aligner. *Bioinformatics*. 2013;29(1):15-21. Epub  
998 2012/10/30. doi: 10.1093/bioinformatics/bts635. PubMed PMID: 23104886; PubMed  
999 Central PMCID: PMC3530905.
- 1000 70. Liao Y, Smyth GK, Shi W. featureCounts: an efficient general purpose  
1001 program for assigning sequence reads to genomic features. *Bioinformatics*.  
1002 2014;30(7):923-30. Epub 2013/11/15. doi: 10.1093/bioinformatics/btt656. PubMed  
1003 PMID: 24227677.
- 1004 71. Anders S, Huber W. Differential expression analysis for sequence count data.  
1005 *Genome Biol*. 2010;11(10):R106. Epub 2010/10/29. doi: 10.1186/gb-2010-11-10-r106.  
1006 PubMed PMID: 20979621; PubMed Central PMCID: PMC3218662.
- 1007 72. CRAN. Package pheatmap [cited 24 Sep 2020]. Available from:  
1008 <https://cran.r-project.org/web/packages/pheatmap/index.html>.
- 1009 73. Weiner 3rd J DT. tmod: an R package for general and multivariate enrichment  
1010 analysis. *PeerJ Preprints*. 2016. doi: 10.7287/peerj.preprints.2420v1.
- 1011 74. Smyth GK. limma: Linear Models for Microarray Data. In: Gentleman R,  
1012 CVJ, Huber W., Irizarry R.A., Dudoit S., editor. *Bioinformatics and Computational  
1013 Biology Solutions Using R and Bioconductor* Springer, New York, NY: Springer, New  
1014 York, NY; 2005. p. 397-420.
- 1015
- 1016

1017 **Data availability**

1018 All relevant data are provided in the manuscript and the Supporting Information files.

1019

1020 **Funding**

1021 N.N. was funded through the Research Program on Emerging and Reemerging Infectious

1022 Diseases from the Japan Agency for Medical Research and Development (JP19fk0108072) and

1023 by a grant-in-aid for scientific research from the Ministry of Education, Culture, Sports,

1024 Science, and Technology in Japan (18H02665). H.S. was funded through the Japan Agency for

1025 Medical Research and Development (JP19fk0108084). T. Su was funded through the Japan

1026 Agency for Medical Research and Development (JP19fk0108104, JP20fk0108104, and

1027 JP19fk0108110). H.H. was funded through the Japan Agency for Medical Research and

1028 Development (JP19fk0108112). The funders played no role in study design, data collection and

1029 analysis, decision to publish, or preparation of the manuscript.

1030

1031 **Competing interests**

1032 The authors have declared no competing interests.

1033

1034 **Author contributions**

1035 Conceptualization: NN, NI-Y, T. Su, HH

1036 Data Curation: NN

1037 Formal Analysis: NN, KS, AA

1038 Funding Acquisition, NN, HS, T. Su, HH

- 1039 Investigation: NN, NI-Y, KS, AA, NS, MS, NK, TA, YS, TH, YK, YA, SI, HK, SF, T. Se, T.  
1040 Su
- 1041 Methodology: NN, NI-Y, KS, AA, YA, T. Su
- 1042 Project Administration: NN, T. Su, HH
- 1043 Resources: NN, NI-Y, KS, AA, HS, T. Su, HH
- 1044 Supervision: NN, T. Su, HH
- 1045 Validation: NN, T. Su, HH
- 1046 Visualization: NN, KS
- 1047 Writing - Original Draft: NN, KS
- 1048 Writing - Review & editing: NN, NI-Y, KS, AA, NS, MS, NK, TA, YS, TH, YK, YA, SI, HK,  
1049 SF, T. Se, HS, T. Su, and HH
- 1050

1051 **Figure legends**

1052

1053 **Fig. 1. Study design and clinical scores in cynomolgus monkeys after inoculation of**

1054 **SARS-CoV-2.** Study outline (A). Black arrows indicate preparation for experimental

1055 infection. Six 5-year-old monkeys were selected from 25 monkeys. Red and yellow arrow heads

1056 indicate virus inoculation. After assigning animals to "CD3+ high" and "CD3+ low" groups, six

1057 cynomolgus monkeys were infected with an isolate from East Asia (WK-521 strain) via a

1058 combination of intranasal (0.125 mL, sprayed into the right nostril), conjunctival (0.1 mL,

1059 dropped into the right eye), and intratracheal (1.275 mL virus solution plus 2 mL saline via a

1060 catheter) inoculation. After the initial inoculation, body weight was measured, and samples were

1061 collected at various time points (blue arrows). Red arrows denote autopsy at 7 or 14 days after

1062 the first or second inoculation (n = 1 per group at each time point). Four monkeys received a

1063 second inoculation with an isolate from Europe (QH-329-037 strain). (B) Clinical scores of

1064 cynomolgus monkeys inoculated with SARS-CoV-2. Cool (blue and aqua) and warm (red and

1065 orange) colored symbols and lines indicate data from the CD3+ high group and CD3+ low

1066 group animals, respectively. After transfer to the ABSL3 facility, the monkeys were observed

1067 once daily for clinical signs and scored accordingly. Black dashed lines on the horizontal axis

1068 indicate the range of clinical scores recorded during the ABSL3 facility acclimatization period.

1069 Each dot/line represents data from an individual animal after initial inoculation with

1070 SARS-CoV2. The brown dashed line on the vertical axis indicates the day of the second

1071 inoculation.

1072



1073

1074 **Fig. 2. Hematological examination of cynomolgus monkeys inoculated with**  
1075 **SARS-CoV-2.** Hemoglobin (HGB) in EDTA-treated whole blood samples was examined at  
1076 various time points after inoculation (A). Absolute numbers of lymphocytes and monocytes in  
1077 EDTA-treated whole blood samples were determined at various time points after inoculation  
1078 (B). Leukocyte differentiation (e.g., CD3, CD20, and CD16) at various time points after  
1079 inoculation was examined by flow cytometry (C). Cytokine and chemokine levels in serum  
1080 from each cynomolgus monkey inoculated with SARS-CoV-2 (D). Representative cytokines  
1081 were profiled by multiplex analysis. Assays were performed using unicate samples at each time  
1082 point. Cool (blue and aqua) and warm (red and orange) colored symbols and lines indicate data  
1083 from the CD3+ high and CD3+ low groups, respectively. Each dot/line represents data from an  
1084 individual animal. The brown dashed line on the vertical axis indicates the day of the second  
1085 inoculation.

1086

1087 **Fig. 3. Detection of virus excretion in clinical samples from cynomolgus monkeys**  
1088 **inoculated with SARS-CoV-2.** Six cynomolgus monkeys were used in this study. Cool  
1089 (blue and aqua) and warm (red and orange) colored bars indicate data from CD3+ high and  
1090 CD3+ low groups, respectively. Each bar represents data from an individual animal. After initial  
1091 viral inoculation with the WK-521 strain, clinical samples (conjunctiva, nasal, throat, and rectal  
1092 swabs) were collected. The second inoculation with QH-329-037 strain was performed 35 days  
1093 after the first inoculation. + indicates samples that were positive for subgenomic mRNA (black)  
1094 or virus (red). The brown dashed line on the vertical axis indicates the day of the second

1095 inoculation.

1096

1097

1098 **Fig. 4. Seroconversion after SARS-CoV-2 inoculation.** Neutralizing antibody titers  
1099 (against the WK-521 strain) in sera (A). Antibody subclasses and specificity for the spike (S),  
1100 receptor binding domain (RBD), and nucleocapsid (N) proteins were assessed using in-house  
1101 IgM, IgA, and IgG ELISAs (B). Cool (blue and aqua) and warm (red and orange) colored  
1102 symbols and lines indicate data from the CD3<sup>+</sup> high and CD3<sup>+</sup> low groups, respectively. Each  
1103 dot/line represents data from an individual animal. R, correlation coefficient (Spearman's  
1104 correlation analysis) between the neutralization and ELISA tests. The brown dashed line on the  
1105 vertical axis indicates the day of the second inoculation.

1106

1107 **Fig. 5. Transcriptome analysis of blood samples obtained after SARS-CoV-2**  
1108 **inoculation.** Gene set enrichment analysis was performed on samples from the CD3<sup>+</sup> high  
1109 group and CD3<sup>+</sup> low group samples after (Days 1, 4, 7, R0, R1, R4, and R7) virus infection  
1110 (A). The name of each significantly enriched module is listed, along with the module ID (in  
1111 brackets) ( $P < 0.01$ ). Green and gray dots indicate inflammation- and B cell response-related  
1112 modules, respectively. Red and blue indicate the proportion of genes in a particular module that  
1113 is upregulated or downregulated in the CD3<sup>+</sup> high group compared with the CD3<sup>+</sup> low group.  
1114 Each module is represented by a box, where the width is proportional to the effect size  
1115 (AUROC value calculated from the number of genes in the module and ranking by the Cerno  
1116 test), while brighter colors indicate lower  $P$ -values. Gene set enrichment analysis in the CD3<sup>+</sup>

1117 high group (left panel) and CD3+ low group (right panel) at different time points after virus  
1118 infection (Days 1, 4, 7, R0, R1, R4, and R7) compared with baseline (before virus infection:  
1119 Day 0) (B). The name of each significantly enriched module name is listed along with module  
1120 ID (in brackets) ( $P < 0.01$ ). Yellow, green & red, gray, and black dots indicate modules related  
1121 to innate immunity, inflammation, CD4+ T cell response, and T & NK cell responses,  
1122 respectively. Red and blue indicate the proportion of genes in a particular module that is  
1123 upregulated or downregulated in the CD3+ high group compared with the CD3+ low group.  
1124 Each module is represented as a pie chart, where the size is proportional to the effect size  
1125 (AUROC value calculated from the number of genes in the module and ranking by the Cerno  
1126 test), while brighter colors indicate lower  $P$ -values.

1127

1128 **Fig. 6. Detection of virus RNA in tissue samples from cynomolgus monkeys**  
1129 **inoculated with SARS-CoV-2.** Tissue samples were obtained from monkeys at 7 days  
1130 post-inoculation with WK-521 strain (#5404 and #5417), and at 7 days (#5403 and #5412) or 14  
1131 days (#5399 and #5405) after re-infection with QH-329-037 strain. Cool (blue and aqua) and  
1132 warm (red and orange) colored bars indicate data from the CD3+ high group and CD3+ low  
1133 group, respectively. Each bar represents data from an individual animal.

1134

1135 **Fig. 7. Pathology of cynomolgus monkeys inoculated with SARS-CoV-2.** (A) Gross  
1136 pathology of lungs from monkeys at 7 days post-inoculation with WK-521 strain (#5404 and  
1137 #5417), and at 7 days (#5403 and #5412) or 14 days (#5399 and #5405) after re-infection with  
1138 QH-329-037 strain. Ischemic changes and consolidation were observed in the lower lobe of the

1139 right lung of monkey #5417 (red arrows). Other lobes showed congestion and collapse (white  
1140 arrows). Yellow arrows indicate swollen lung lymph nodes in monkeys #5403, #5412, and  
1141 #5399. Atrophic changes are seen in the pulmonary margin in monkeys #5412 and #5405 (blue  
1142 arrows). (B) Representative histopathology of lungs from monkeys at 7 days post-inoculation  
1143 with WK-521 strain (#5404 and #5417). Collections of mononuclear cells were seen in the  
1144 airspaces of the middle lobe of the right lung of monkey #5404 (B, upper row). Pulmonary  
1145 edema with polymorphonuclear leukocyte infiltration and proliferating type II cells overlying  
1146 pulmonary walls were observed in the lower lobe of the right lung of monkey #5417 (B, lower  
1147 row). Scale bars: 500  $\mu\text{m}$  (left column), 50  $\mu\text{m}$  (middle column), and 20  $\mu\text{m}$  (right column).  
1148 Hematoxylin and eosin staining (H&E). (C) Double immunohistochemistry identified cell  
1149 collections in alveolar air spaces at 7 days after the initial inoculation (upper row from #5404;  
1150 lower row from #5417). Infiltrating cells were CD68+ (brown) or CD3+ (green). Bars in C, 50  
1151  $\mu\text{m}$  (left) and 20  $\mu\text{m}$  (right). An anti-CD68 rabbit polyclonal antibody (brown) and an  
1152 anti-CD3-monoclonal antibody (green) were used for IHC in C.

1153

## 1154 **Supporting information**

1155 **S1 Fig. Selection of monkeys for experimental infection.** (A) Body weight of the 25  
1156 monkeys in Figure 1. (B) Analysis of lymphocytes in peripheral blood from 15 animals  
1157 weighing <3.4 kg. Each dot represents data from an individual animal. The blue and red colored  
1158 symbols denote data from the CD3+ high and low groups, respectively.

1159

1160 **S2 Fig. Clinical course in cynomolgus monkeys inoculated with SARS-CoV-2.** Body

1161 weight was measured under anesthesia at various time points after inoculation (A). Biochemical  
1162 markers including globulin (Glob), albumin (ALB), glucose, alkaline phosphatase (ALP), and  
1163 blood urea nitrogen (BUN) in lithium-heparin treated whole blood samples were measured at  
1164 various time points after inoculation (B). Six cynomolgus monkeys were used. Cool (blue and  
1165 aqua) and warm (red and orange) colored symbols and lines indicate data from the CD3+ high  
1166 and CD3+ low groups, respectively. Each dot/line represents data from an individual animal.  
1167 The brown dashed line on the vertical axis indicates the day of second inoculation.

1168

1169 **S3 Fig. Variations in deep body temperature detected by the temperature logger.**

1170 Thermo logger probes were set intraperitoneally at 14 days before inoculation. Black arrows,  
1171 animal transfer date (under anesthesia) from the animal facility to the animal biosafety level 3  
1172 (ABSL3); red and yellow arrow heads, virus inoculation under anesthesia with a mixture of  
1173 ketamine and xylazine; Red brace, deviation from diurnal variation indicates high fever. The  
1174 fluctuation of deep body temperature within a day was maintained during ABSL3  
1175 acclimatization. A drop in deep body temperature due to the mixed anesthesia was observed on  
1176 the day of inoculation.

1177

1178 **S4 Fig. Hematological examination of cynomolgus monkeys inoculated with**

1179 **SARS-CoV-2.** Erythrocyte analysis, including total red blood cells (RBC) and hematocrit  
1180 (HCT), was performed using EDTA-treated whole blood samples taken at various time points  
1181 after inoculation (A). Absolute white blood cell (WBC) count, including total WBC,  
1182 neutrophils, eosinophils, and basophils, in EDTA-treated whole blood samples was measured at

1183 various time points after inoculation (B). Markers of leukocyte differentiation, CD4 and CD8,  
1184 were detected by flow cytometry at various time points after inoculation (C). Cool (blue and  
1185 aqua) and warm (red and orange) colored symbols and lines indicate data from the CD3+ high  
1186 and CD3+ low groups, respectively. Each dot/line represents data from an individual animal.  
1187 The brown dashed line on the vertical axis indicates the day of the second inoculation.

1188

1189 **S5 Fig. Cytokine and chemokine levels in serum samples from cynomolgus**

1190 **monkeys inoculated with SARS-CoV-2.** Sera were obtained from six monkeys at various

1191 time points after inoculation. Pro-inflammatory cytokines and chemokines (A), helper T

1192 cell-related cytokines (B), and other representative factors in serum that drive proliferation of

1193 epithelial cells (TGF- $\alpha$ ) and neutrophils (IL-8) (C) were profiled by multiplex analysis. Assays

1194 were performed using unicate samples per time point. Cool (blue and aqua) and warm (red and

1195 orange) colored symbols and lines indicate data from the CD3+ high and CD3+ low groups,

1196 respectively. Each dot/line represents data from an individual animal. The brown dashed line on

1197 the vertical axis indicates the day of the second inoculation.

1198

1199 **S6 Fig. Detection of subgenomic RNA in clinical samples and tissue samples from**

1200 **cynomolgus monkeys inoculated with SARS-CoV-2.** Virus RNA-positive samples from

1201 Figures 3 and 6 were re-examined to detect viral RNA and subgenomic RNA using three primer

1202 sets (A and B, respectively).

1203

1204 **S7 Fig. Transcriptome analysis of blood samples from cynomolgus monkeys**

1205 **inoculated with SARS-CoV-2.** Volcano plot showing the magnitude and significance of  
1206 differentially expressed genes between samples collected from animals before (Day 0) and after  
1207 (Days 1, 4, 7, R0, R1, R4, and R7) virus infection (A). Red plots indicate genes that were  
1208 upregulated significantly (331 genes) after virus infection, and blue plots indicate genes that  
1209 were downregulated significantly (176 genes) after virus infection (adjusted  $P$ -value < 0.05).  
1210 Plots shown in brighter red or blue represent genes that were either upregulated (190/331 genes)  
1211 or downregulated (86/176 genes) by more than 2-fold. Expression of immunity-related genes in  
1212 peripheral whole blood samples collected from animals before (Day 0) and after (Days 1, 4, 7,  
1213 R0, R1, R4, and R7) virus infection (B). Heatmaps showing normalized counts per gene, scaled  
1214 by rows of 78 immune-related genes among the 507 genes significantly upregulated or  
1215 downregulated by virus infection (adjusted  $P$ -value < 0.05). Gene symbols are listed on the  
1216 right. Yellow and green/red dots indicate genes related to innate immunity and inflammation,  
1217 respectively. Each column represents a different sample. Animal ID, days post-virus infection  
1218 (dpi), and CD3+ expression in each sample are shown at the top.

1219

1220 **S8 Fig. Double immunohistochemistry to detect virus antigens (brown) and ACE2**  
1221 **(green) in the lungs at 7 days after initial inoculation.** ACE2 was detected in the intact  
1222 brush border of the respiratory epithelia in the intrapulmonary bronchus (black arrows);  
1223 however, no cells were positive for viral antigens (red arrow; upper row, left). Viral antigen was  
1224 detected in linear pneumocytes and type I pneumocytes (red arrow), and slight expression of  
1225 ACE2 was detected in round pneumocytes (suggestive of type II pneumocytes) (black arrows),  
1226 in the alveolar area in the absence of inflammatory infiltration (upper row, right). Strong

1227 expression of ACE2 on large pneumocytes suggested hyperplasia of type II pneumocytes (black  
1228 arrows, lower row); there were no degenerated viral antigen-positive pneumocytes (red arrow,  
1229 lower row, left) at the lesion sites in the alveolar area. Bars, 20  $\mu\text{m}$ . An anti-SARS-CoV-2  
1230 nucleocapsid protein rabbit polyclonal antibody and an anti-ACE2 goat-polyclonal antibody  
1231 were used for IHC.

1232

1233 **S9 Fig. Lung pathology in cynomolgus monkeys receiving a second inoculation**

1234 **with SARS-CoV-2.** Representative histopathology images of lungs from monkeys obtained at

1235 7 days (#5403 and #5412) or 14 days (#5399 and #5405) after re-infection with QH-329-037

1236 strain. Cellular infiltration, including lymphocytes and macrophages, can be seen around the

1237 bronchi and in the alveoli in the middle lobe of the right lung from monkey #5403 (first row).

1238 Lymphoid aggregates, including alveolar macrophages, were observed in the alveoli in the

1239 upper lobe of the right lung from monkey #5399 (second row). Lymphoid aggregates around

1240 small vessels (red arrowheads) and fibrotic inflammation with lymphocyte aggregation in the

1241 alveolar area and pleura (blue arrowheads) were seen in the right lung from monkeys #5412 and

1242 #5405 (third and fourth rows). Scale bars: 500  $\mu\text{m}$  (left column), 50  $\mu\text{m}$  (middle column), and

1243 20  $\mu\text{m}$  (right column). Hematoxylin and eosin staining (H&E).

1244

1245 **S10 Fig. Representative images of histopathological lesions from cynomolgus**

1246 **monkeys after experimental inoculation with SARS-CoV-2.** Representative

1247 hemophagocytosis images of the lung and lymph nodes from monkey #5417 obtained at 7 days

1248 after infection with WK-521 strain (A). Hemophagocytes are seen in the alveoli and sinus of the



1249 cervical and splenic lymph nodes (yellow arrows). Scale bars: 50  $\mu\text{m}$  (left column) and 20  $\mu\text{m}$   
1250 (right column). Hematoxylin and eosin (H&E) staining. Eosinophil (yellow arrows) and plasma  
1251 cell (blue arrows) infiltration into the mesenteric lymph node and intestines from monkey #5412  
1252 at 7 days after the second inoculation with QH-329-037 (B). Cellular infiltration, including  
1253 eosinophils and plasma cells, can be seen in the sinus of the mesenteric lymph node and the  
1254 lamina propria of the small and large intestine. Scale bars: 500  $\mu\text{m}$  (left column) and 20  $\mu\text{m}$   
1255 (right column). H&E staining.

1256

1257

1258 **S1 Table. Cross neutralization of two strains of SARS-CoV-2 in monkey sera after**  
1259 **experimental infection.**

1260 **S2 Table. Summary of the results of next generation sequencing of SARS-CoV-2**  
1261 **from tissue samples of experimentally infected monkeys**

1262 **S3 Table. D614G variants in tissue samples from experimentally infected monkeys**

1263 **S4 Table. Primer and probe sets used in this study.**

1264

A

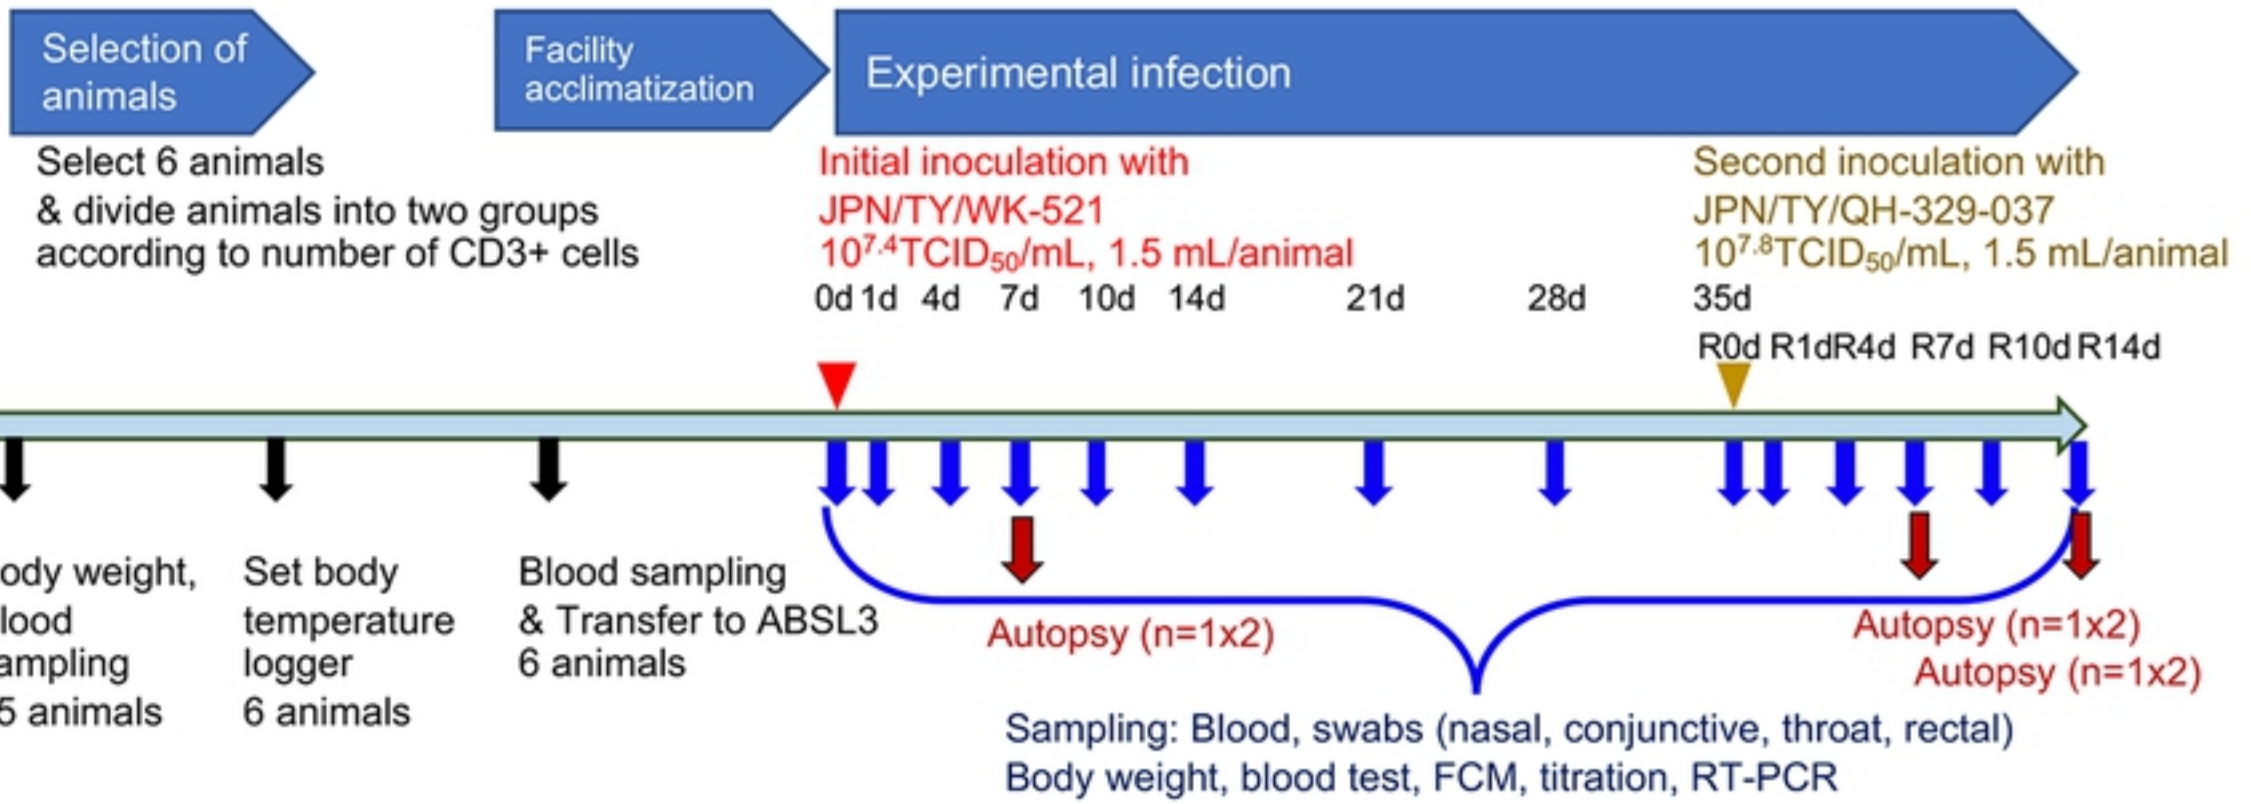

bioRxiv preprint doi: <https://doi.org/10.1101/2021.01.07.425698>; this version posted January 7, 2021. The copyright holder for this preprint (which was not certified by peer review) is the author/funder, who has granted bioRxiv a license to display the preprint in perpetuity. It is made available under aCC-BY 4.0 International license.

B

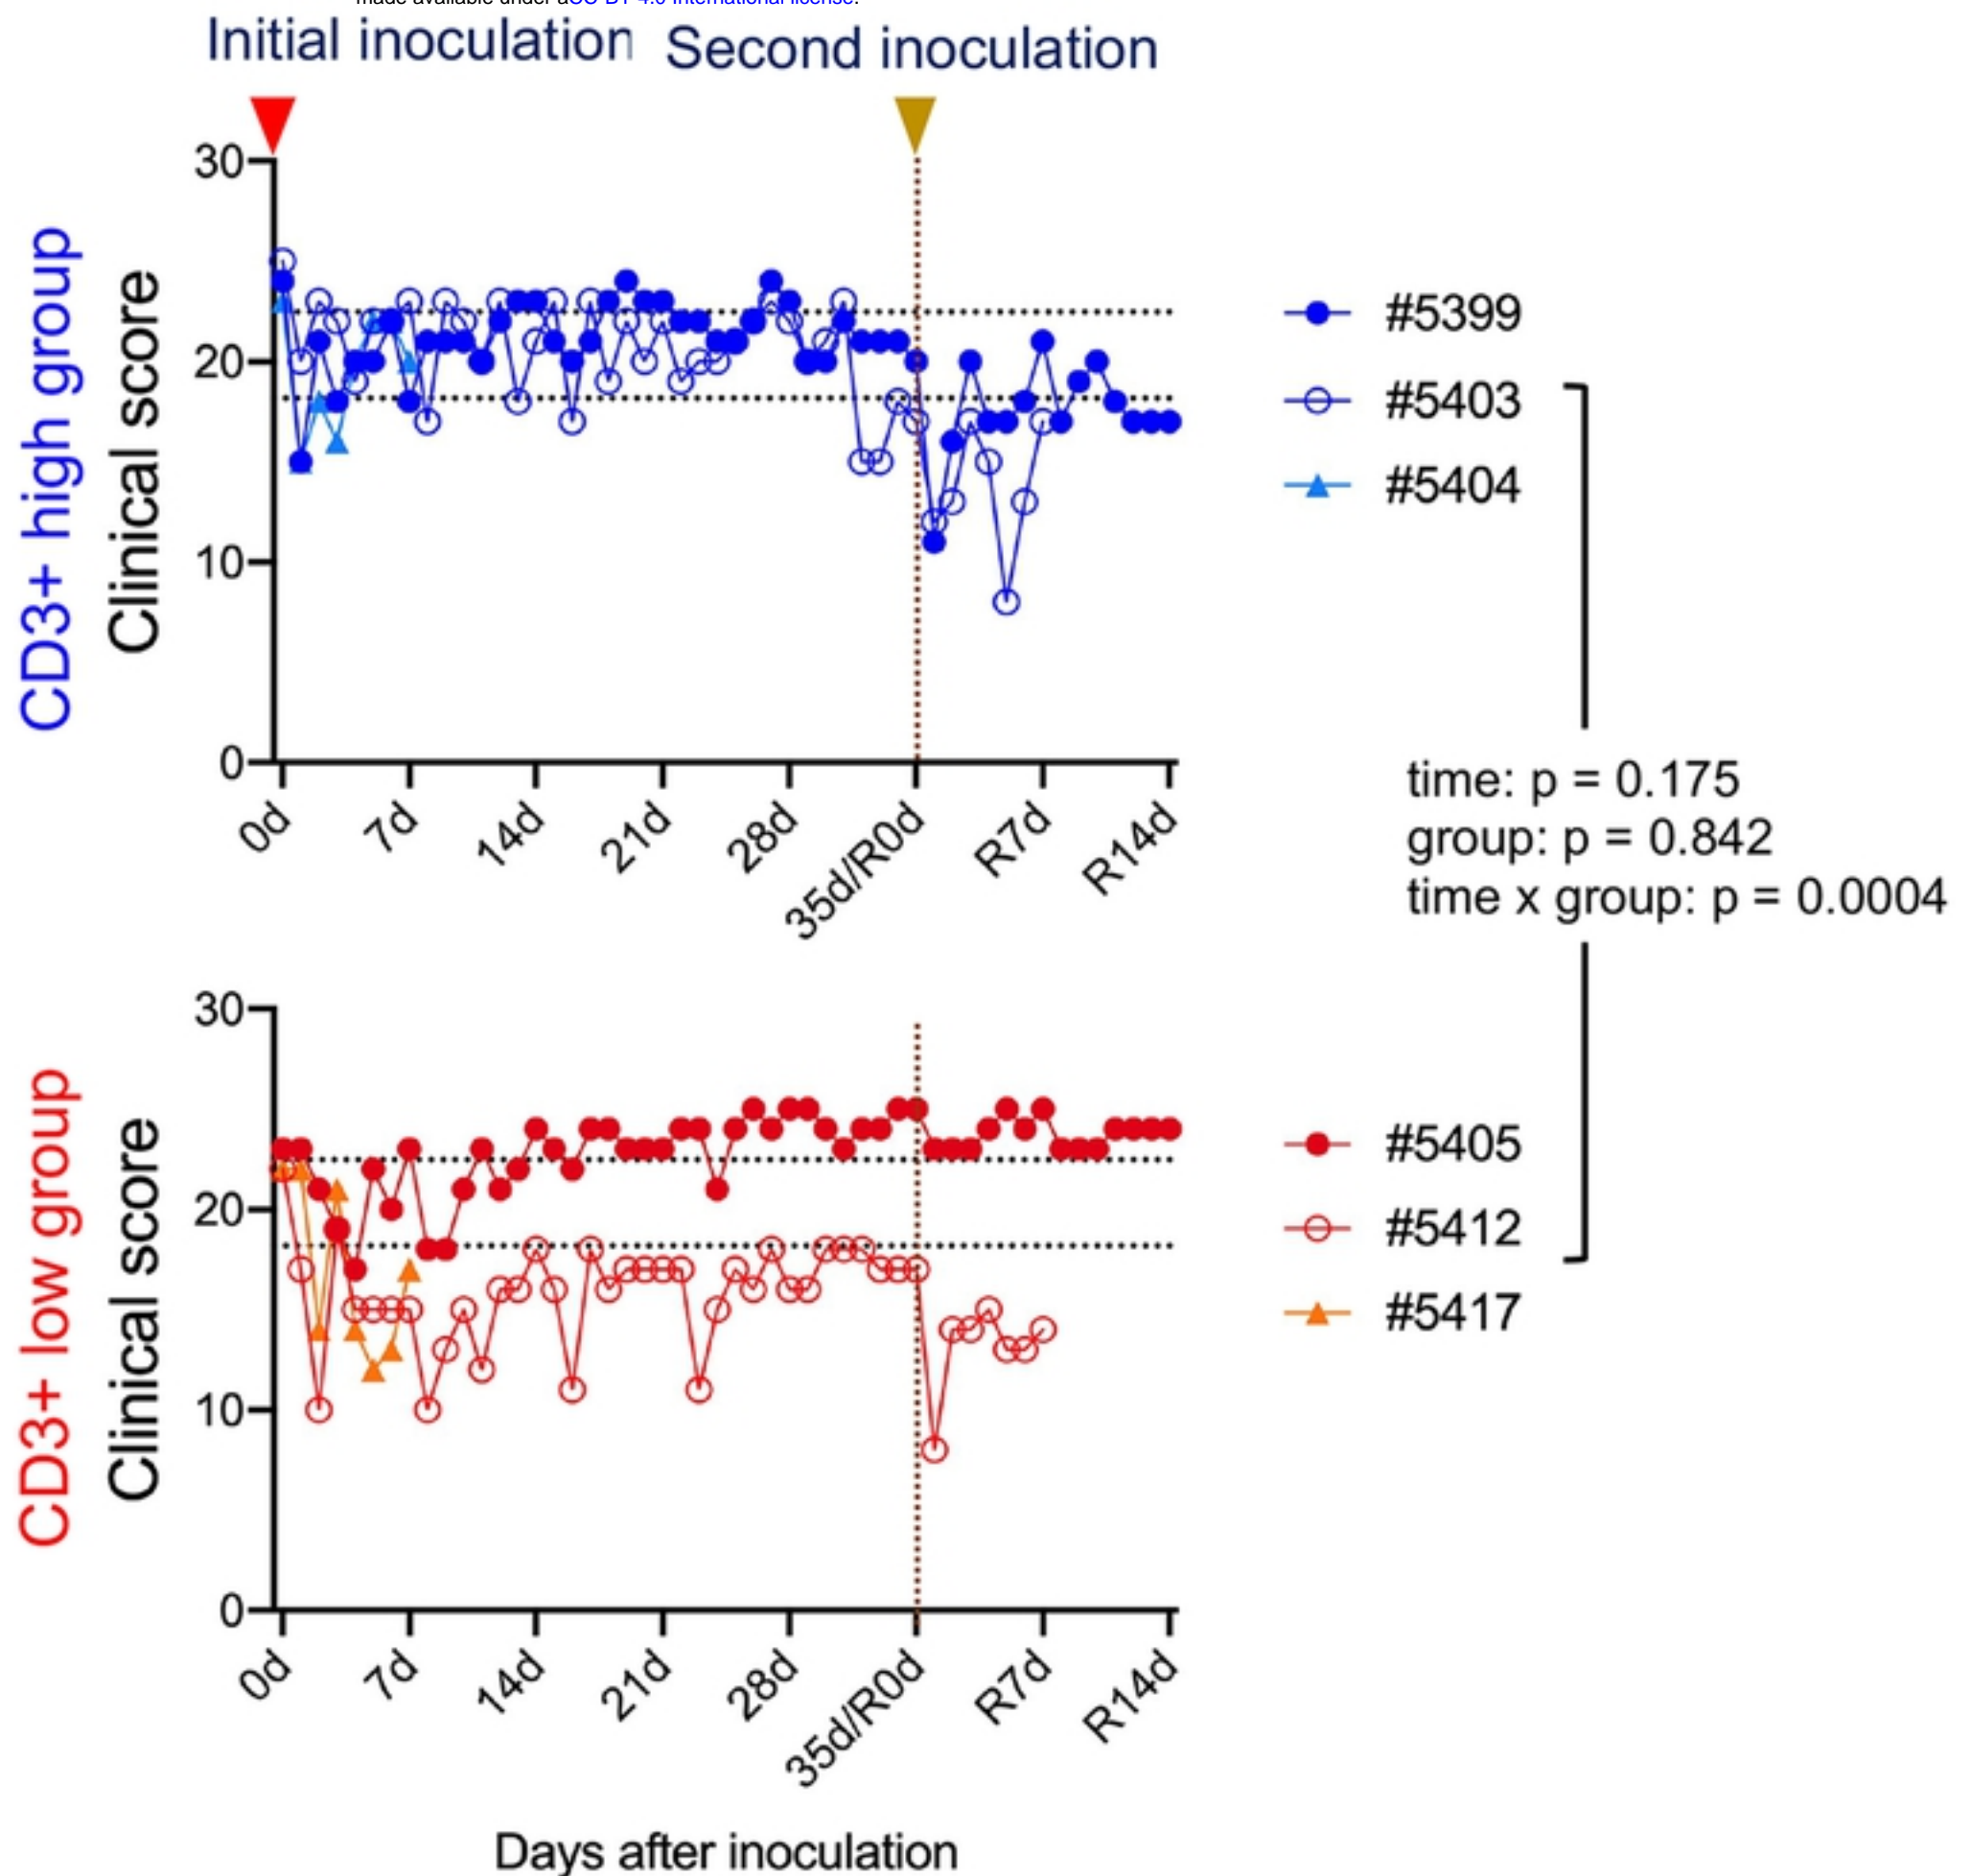

Figure 1

**A**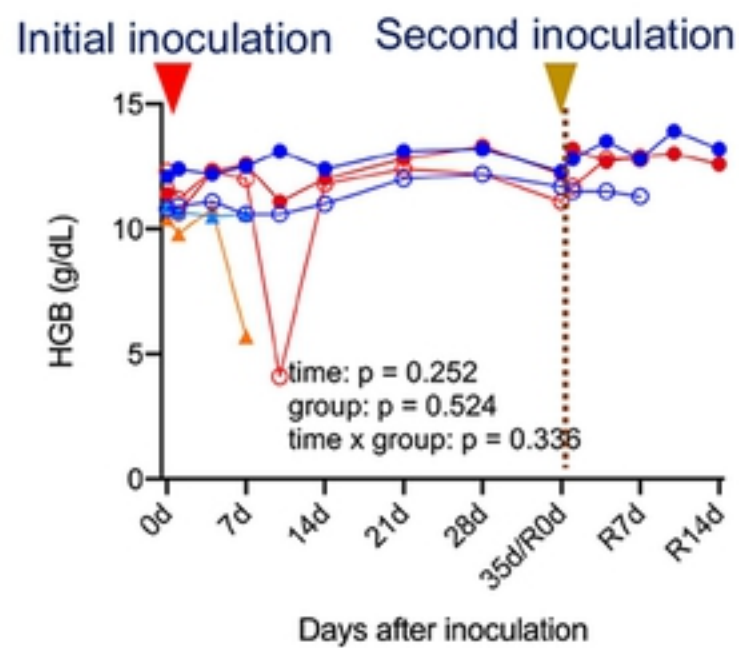**B**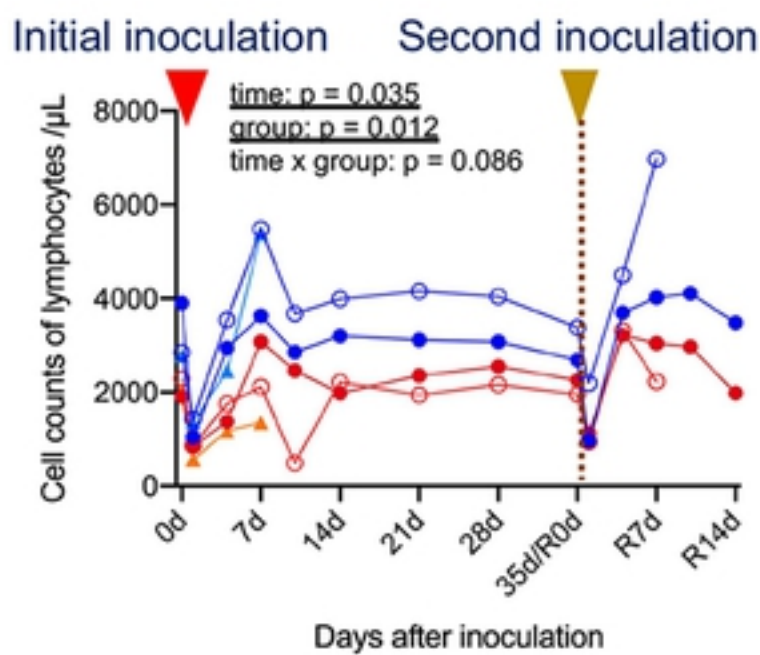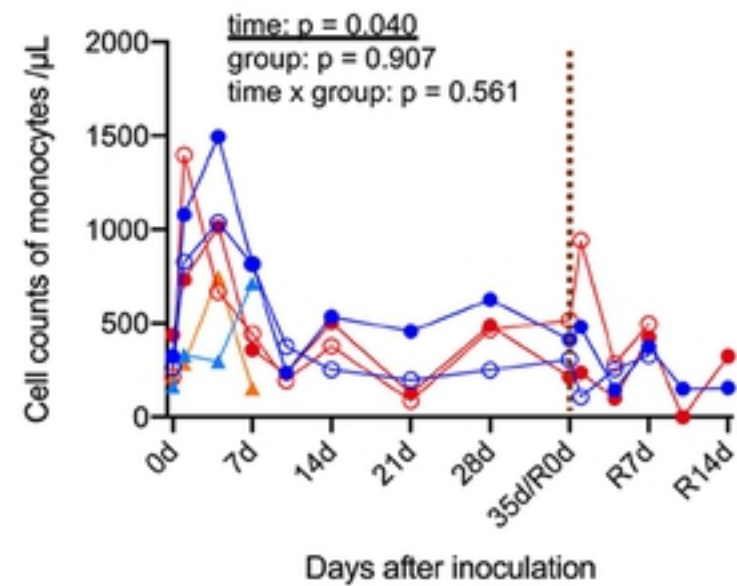**C**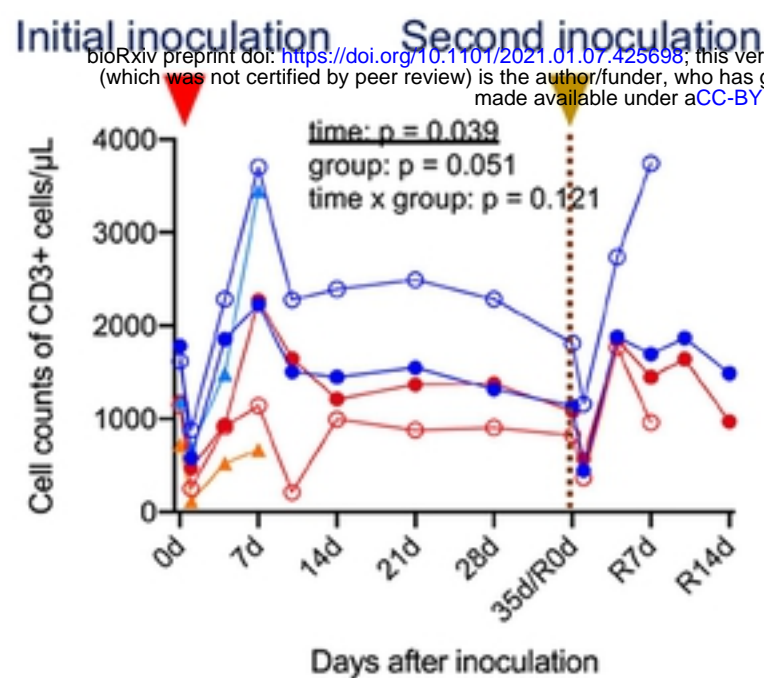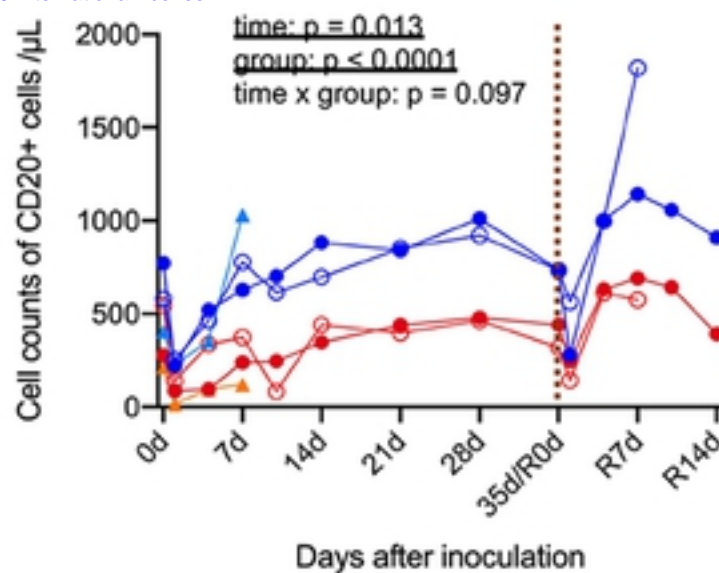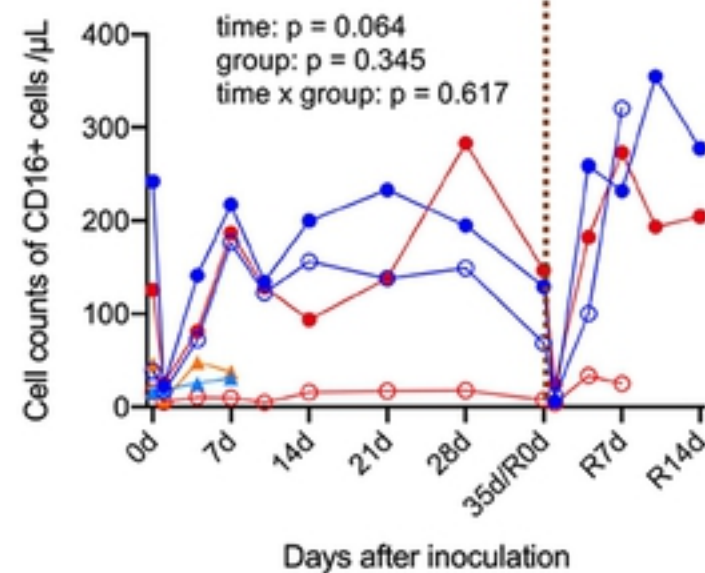**D**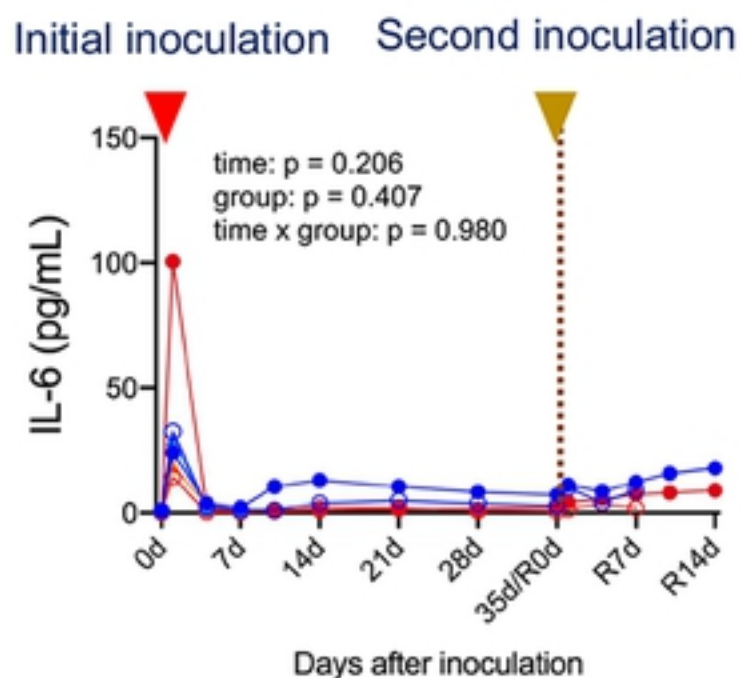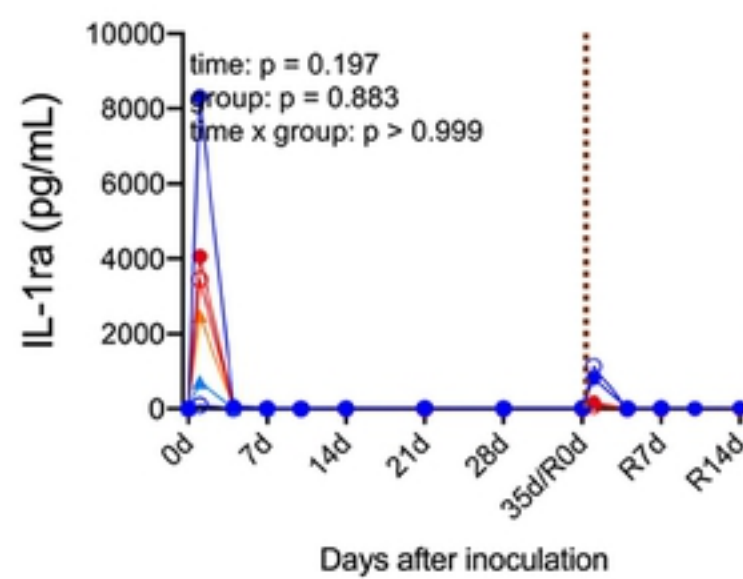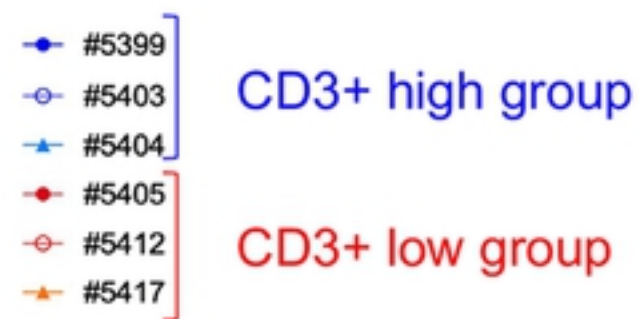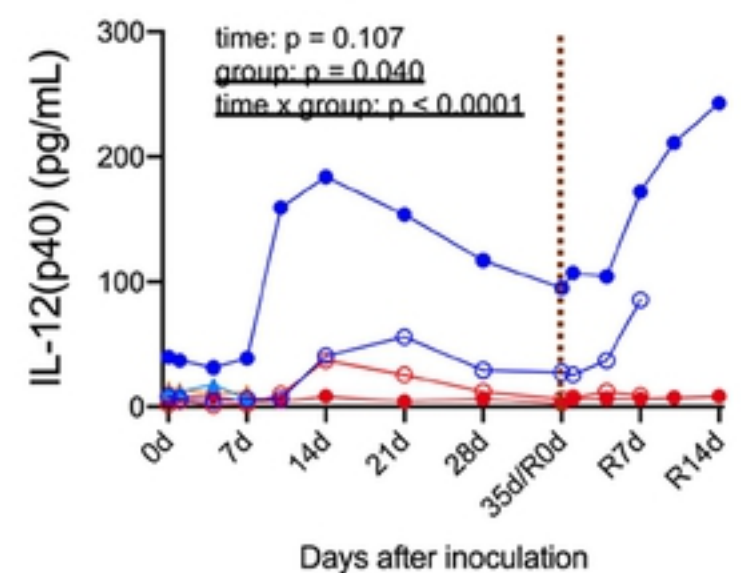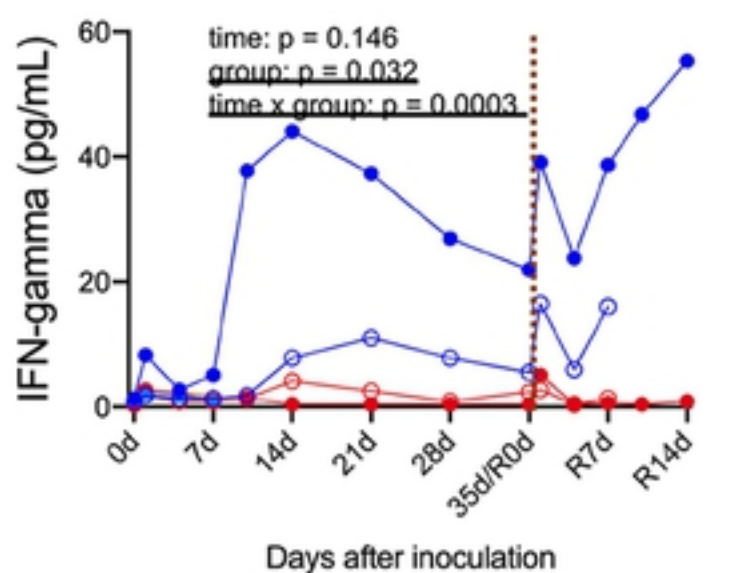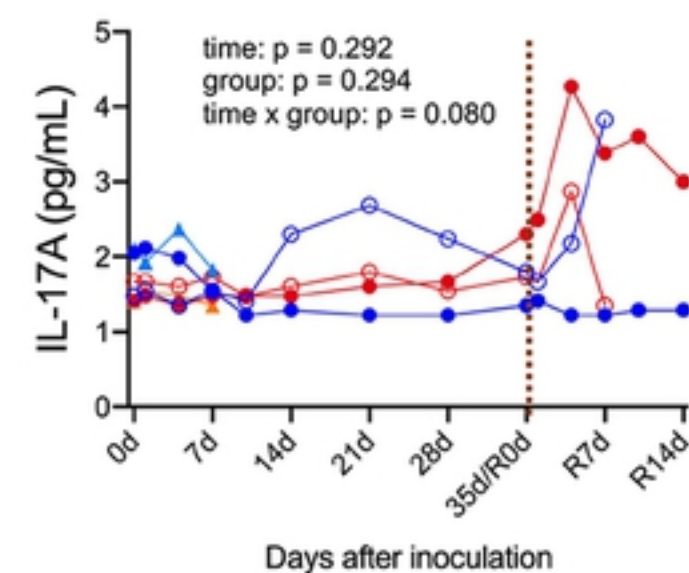

Figure 2

### CD3+ high group

### CD3+ low group

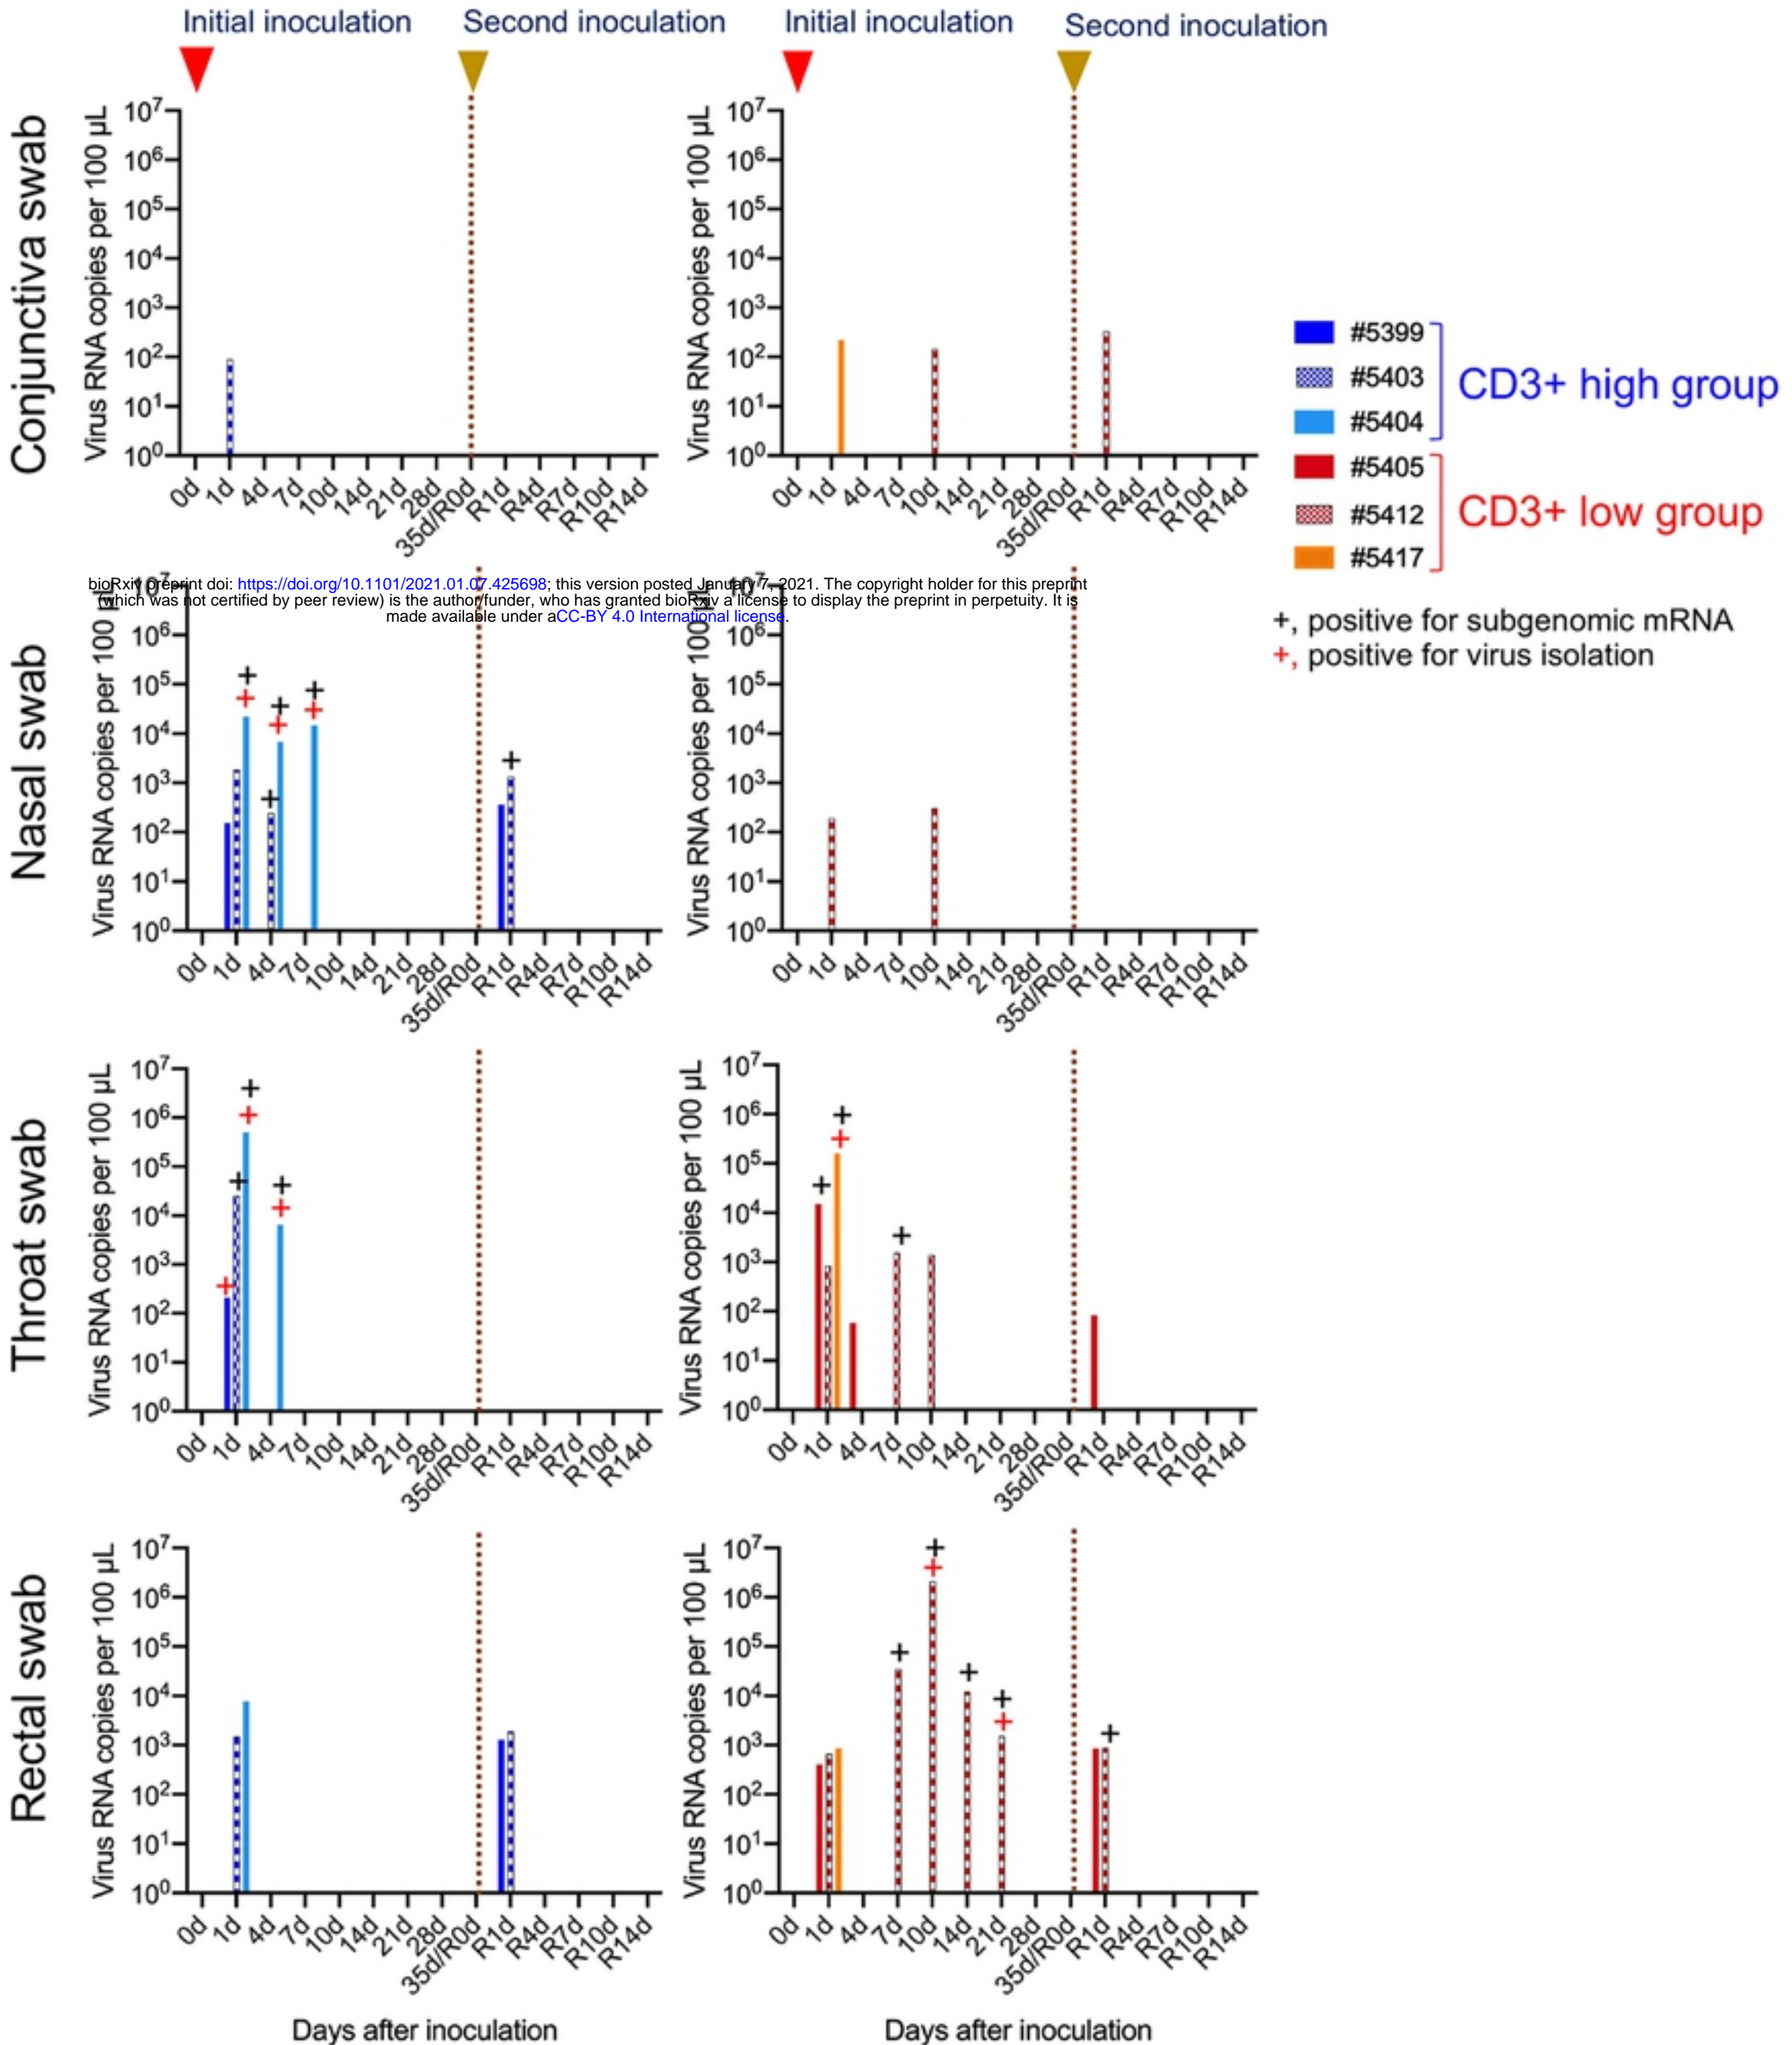

Figure 3

**A**

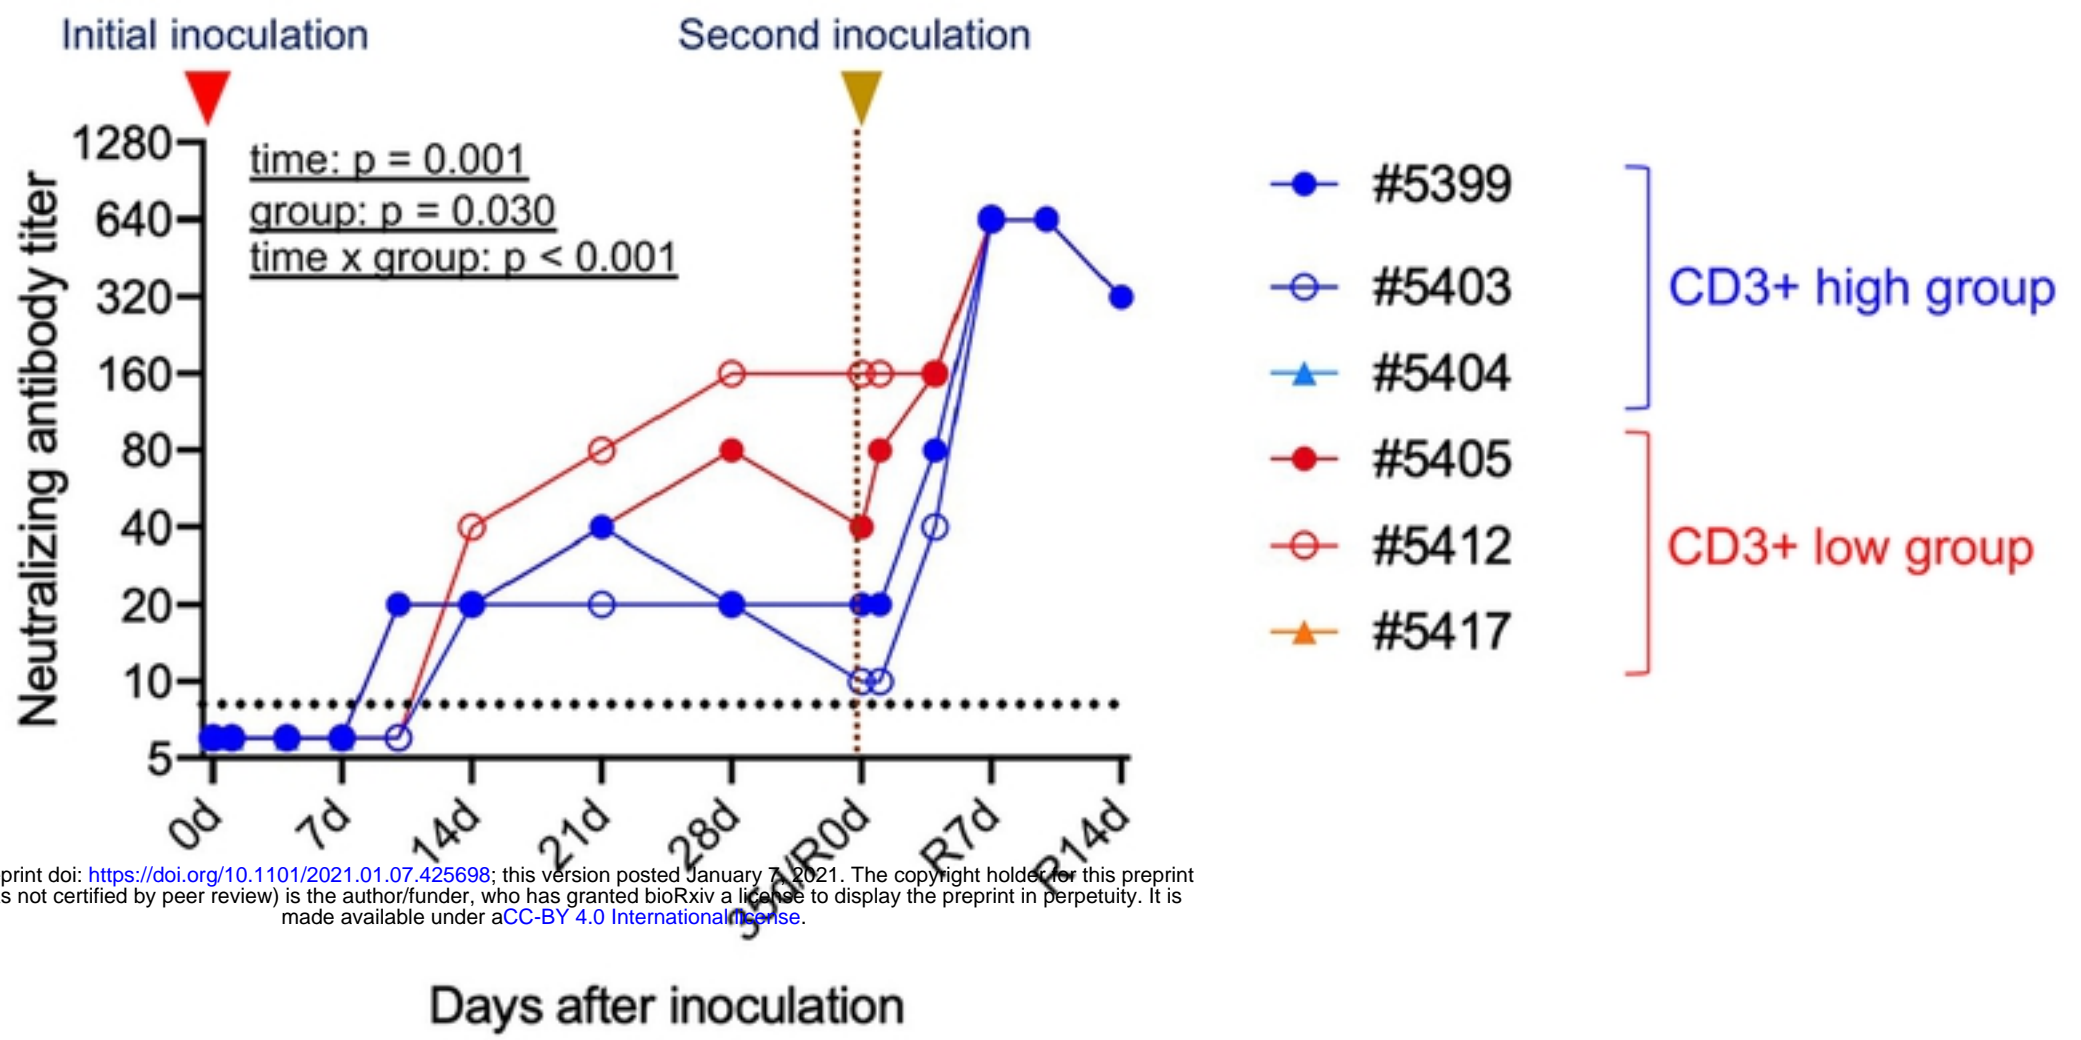

bioRxiv preprint doi: <https://doi.org/10.1101/2021.01.07.425698>; this version posted January 7, 2021. The copyright holder for this preprint (which was not certified by peer review) is the author/funder, who has granted bioRxiv a license to display the preprint in perpetuity. It is made available under aCC-BY 4.0 International license.

**B**

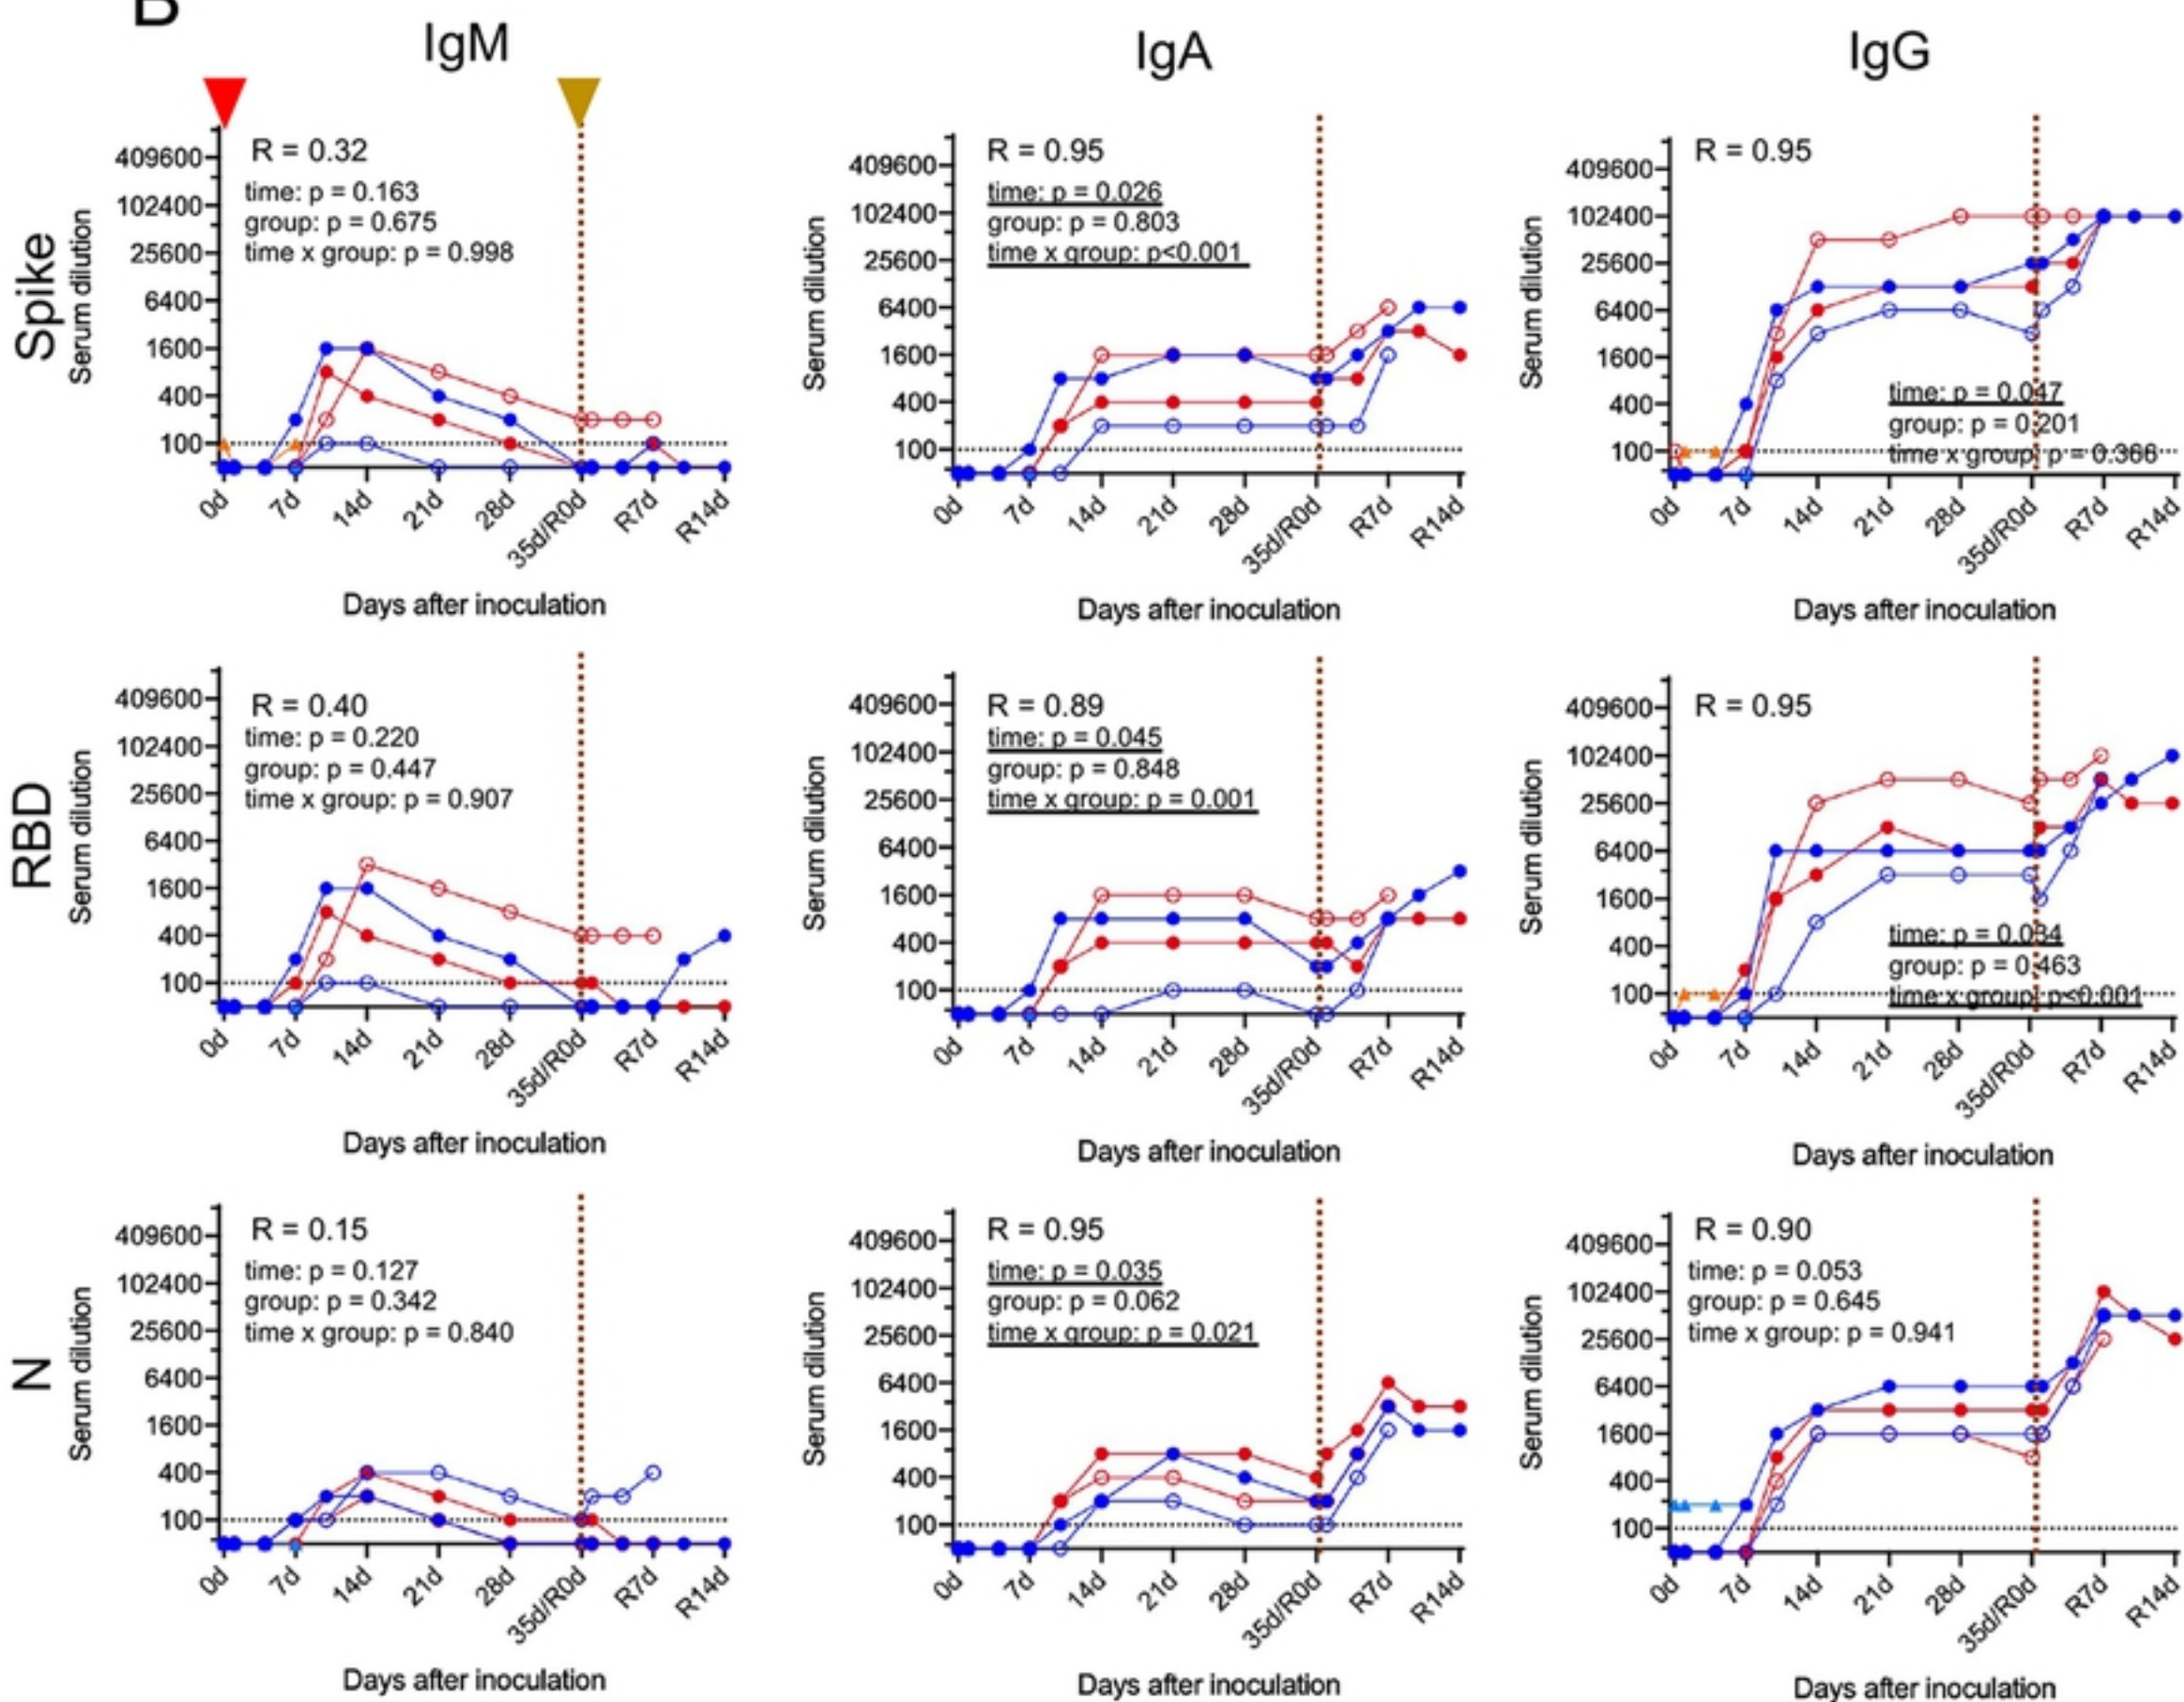

Figure 4

# A CD3+ high vs CD3+ low group

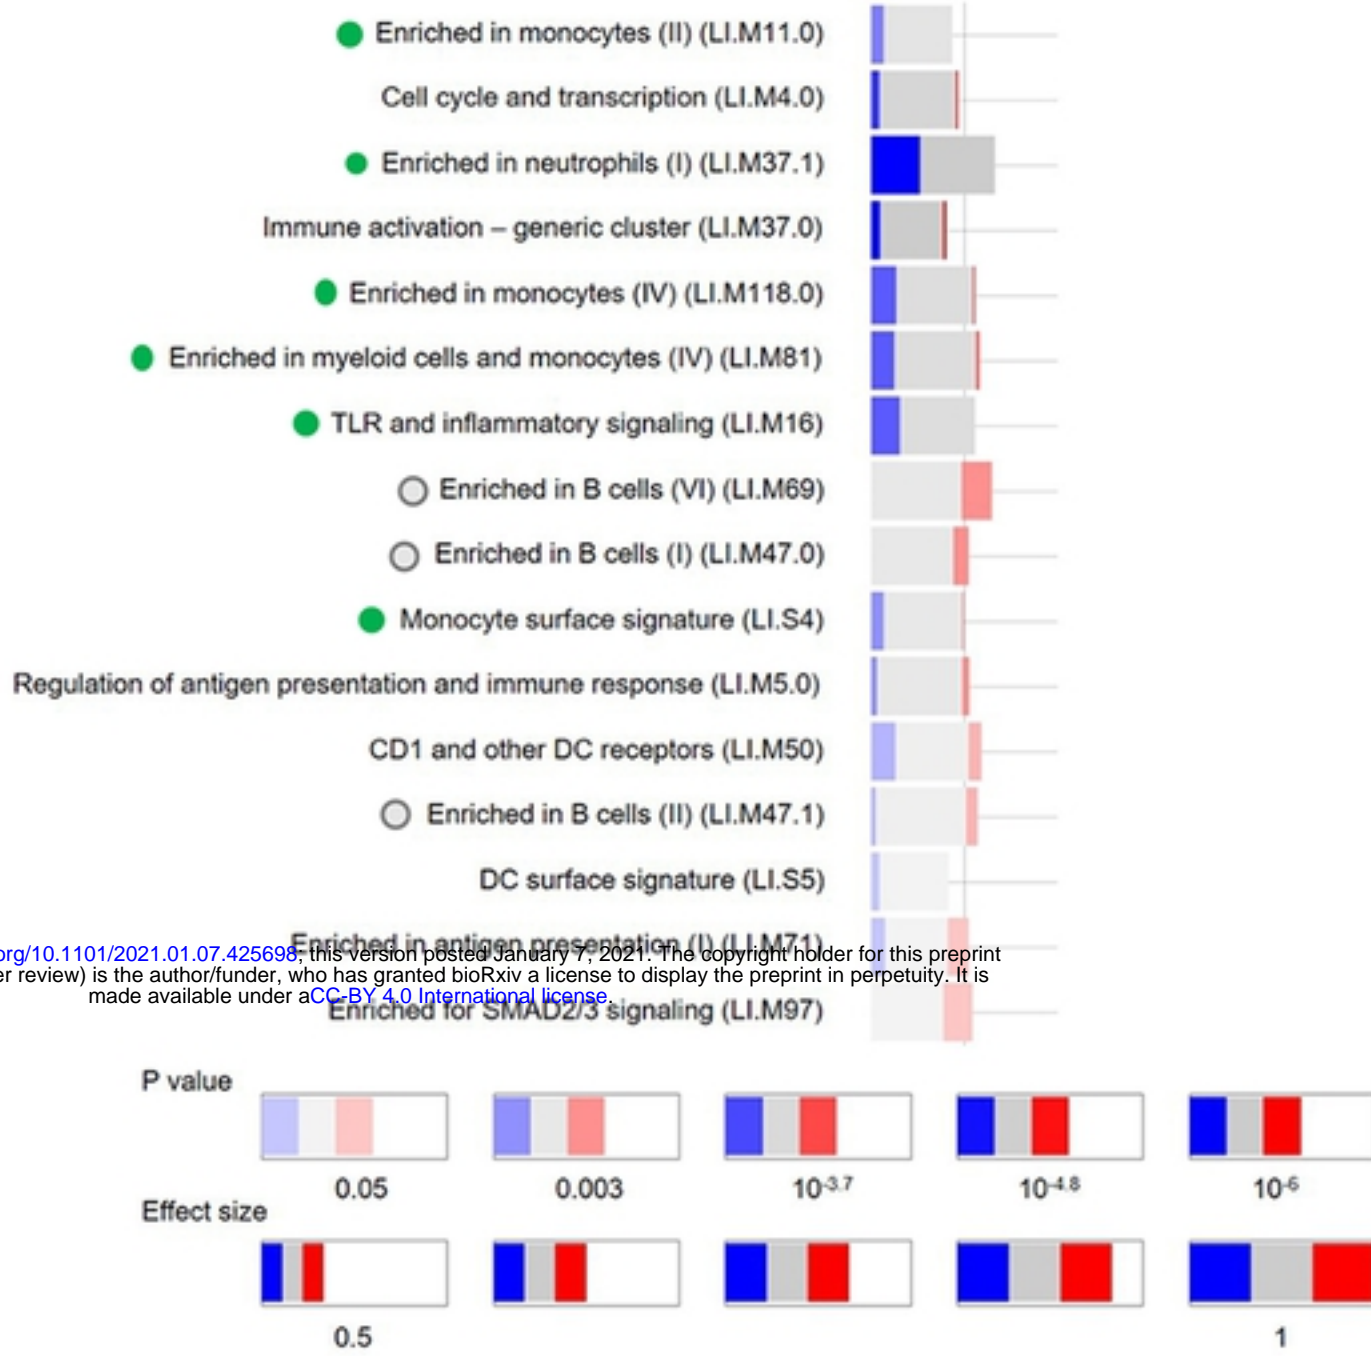

bioRxiv preprint doi: <https://doi.org/10.1101/2021.01.07.425698>; this version posted January 7, 2021. The copyright holder for this preprint (which was not certified by peer review) is the author/funder, who has granted bioRxiv a license to display the preprint in perpetuity. It is made available under aCC-BY 4.0 International license.

# B

## CD3+ high group

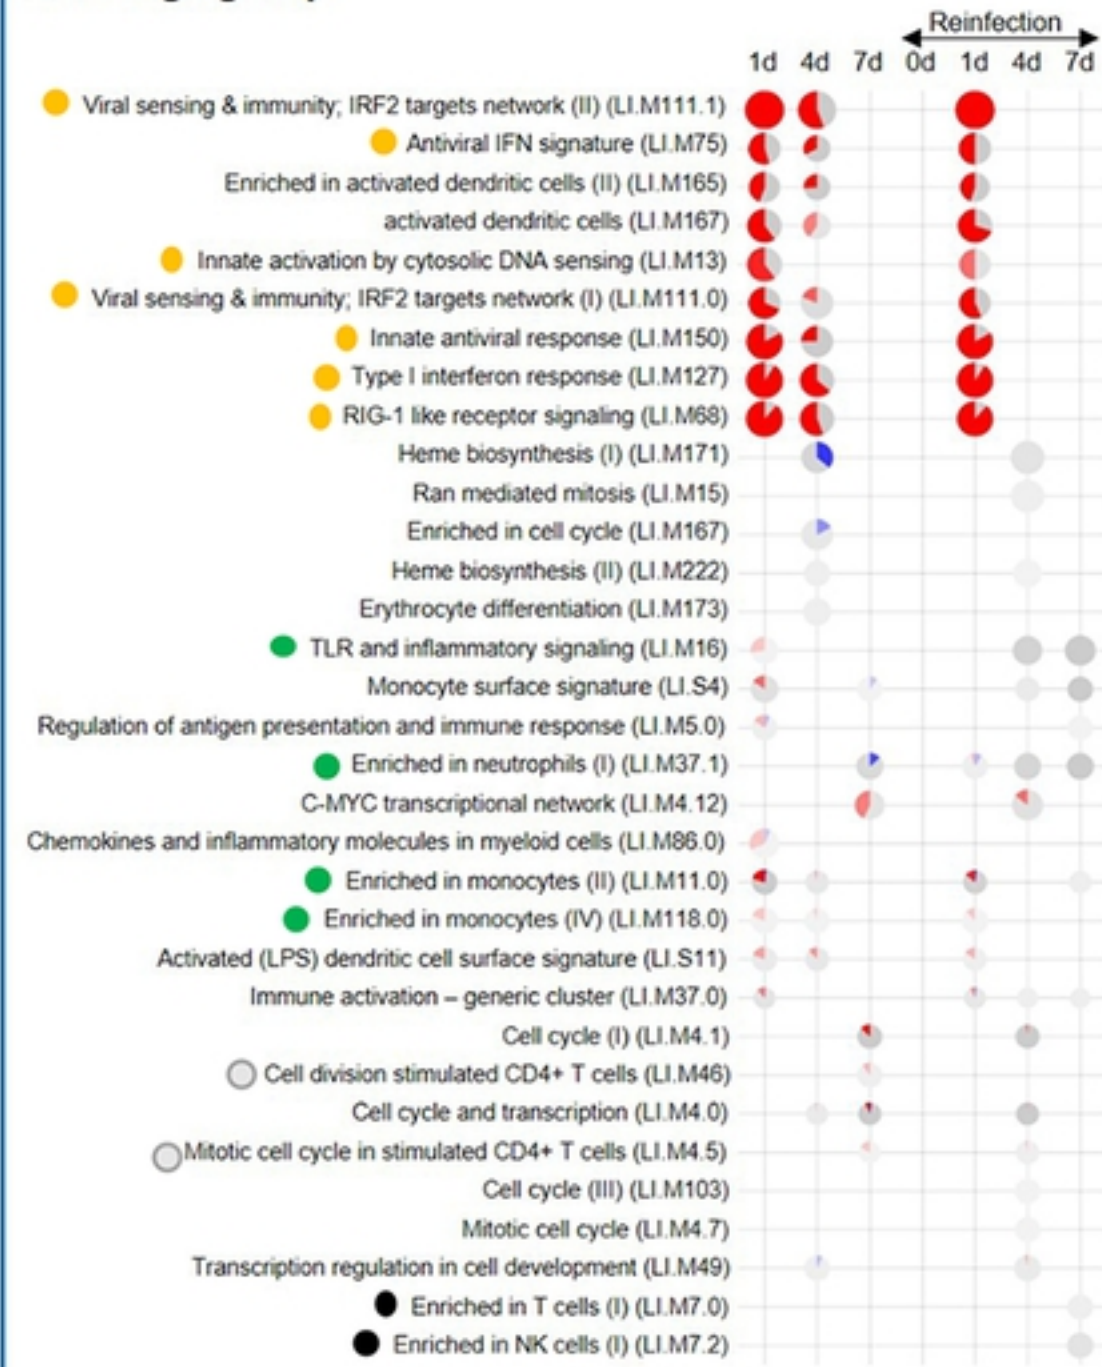

## CD3+ low group

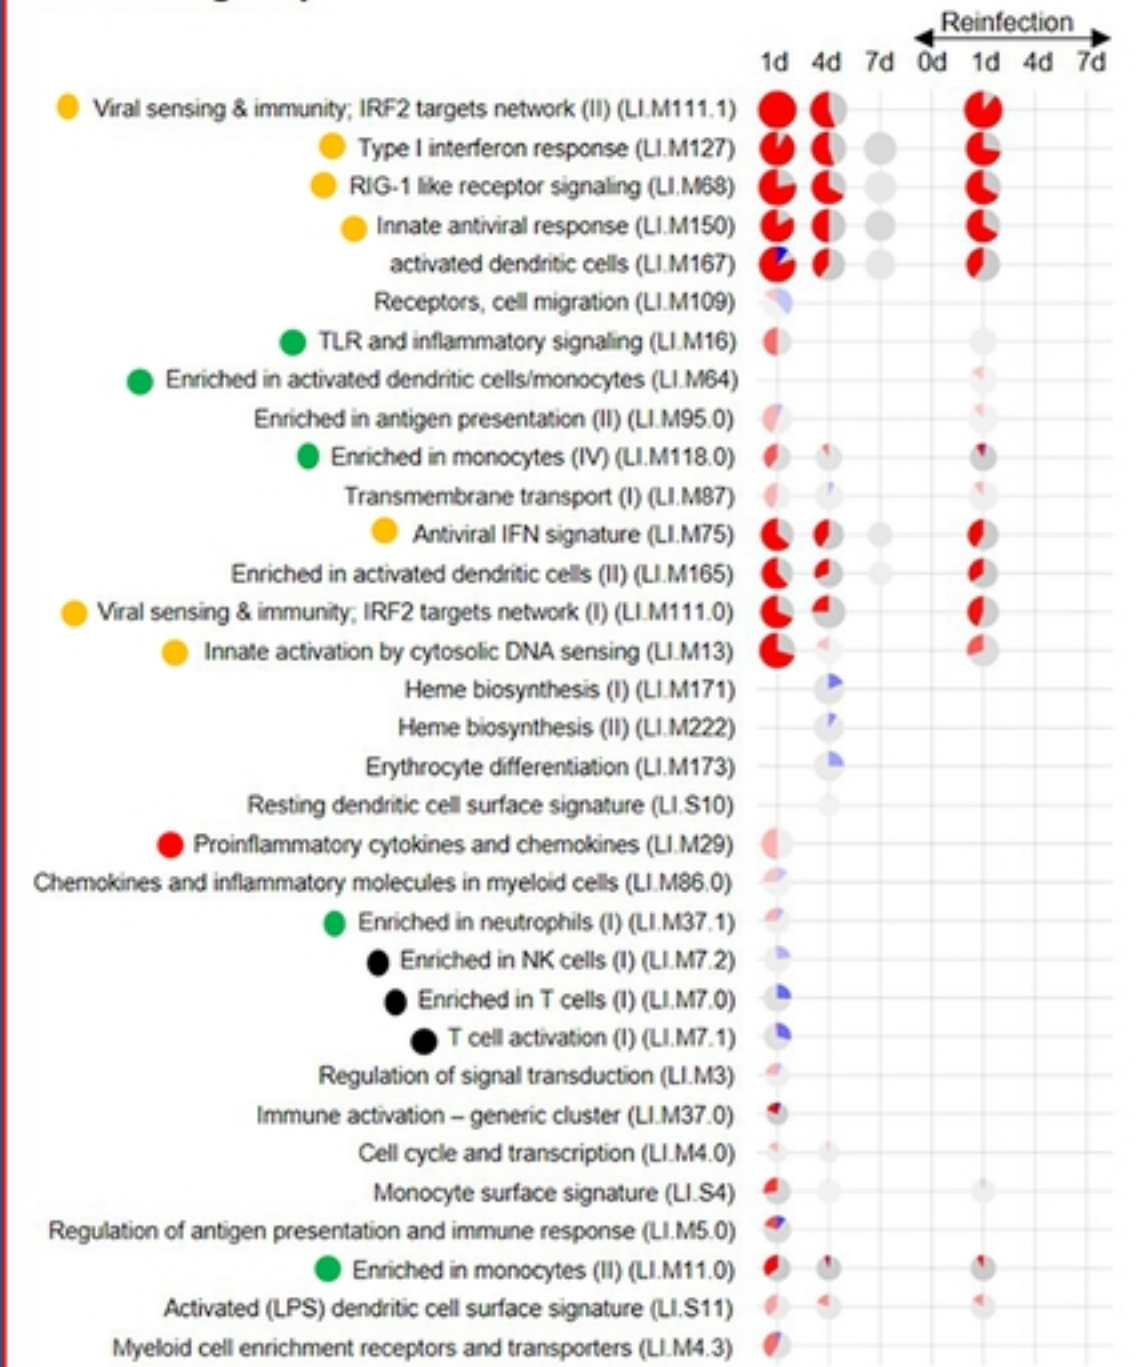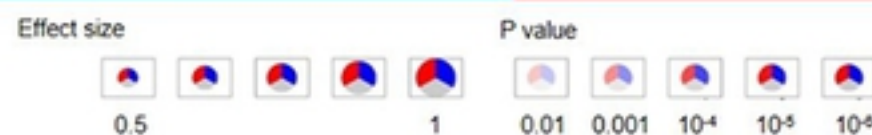

Figure 5

A

7 days p.i.

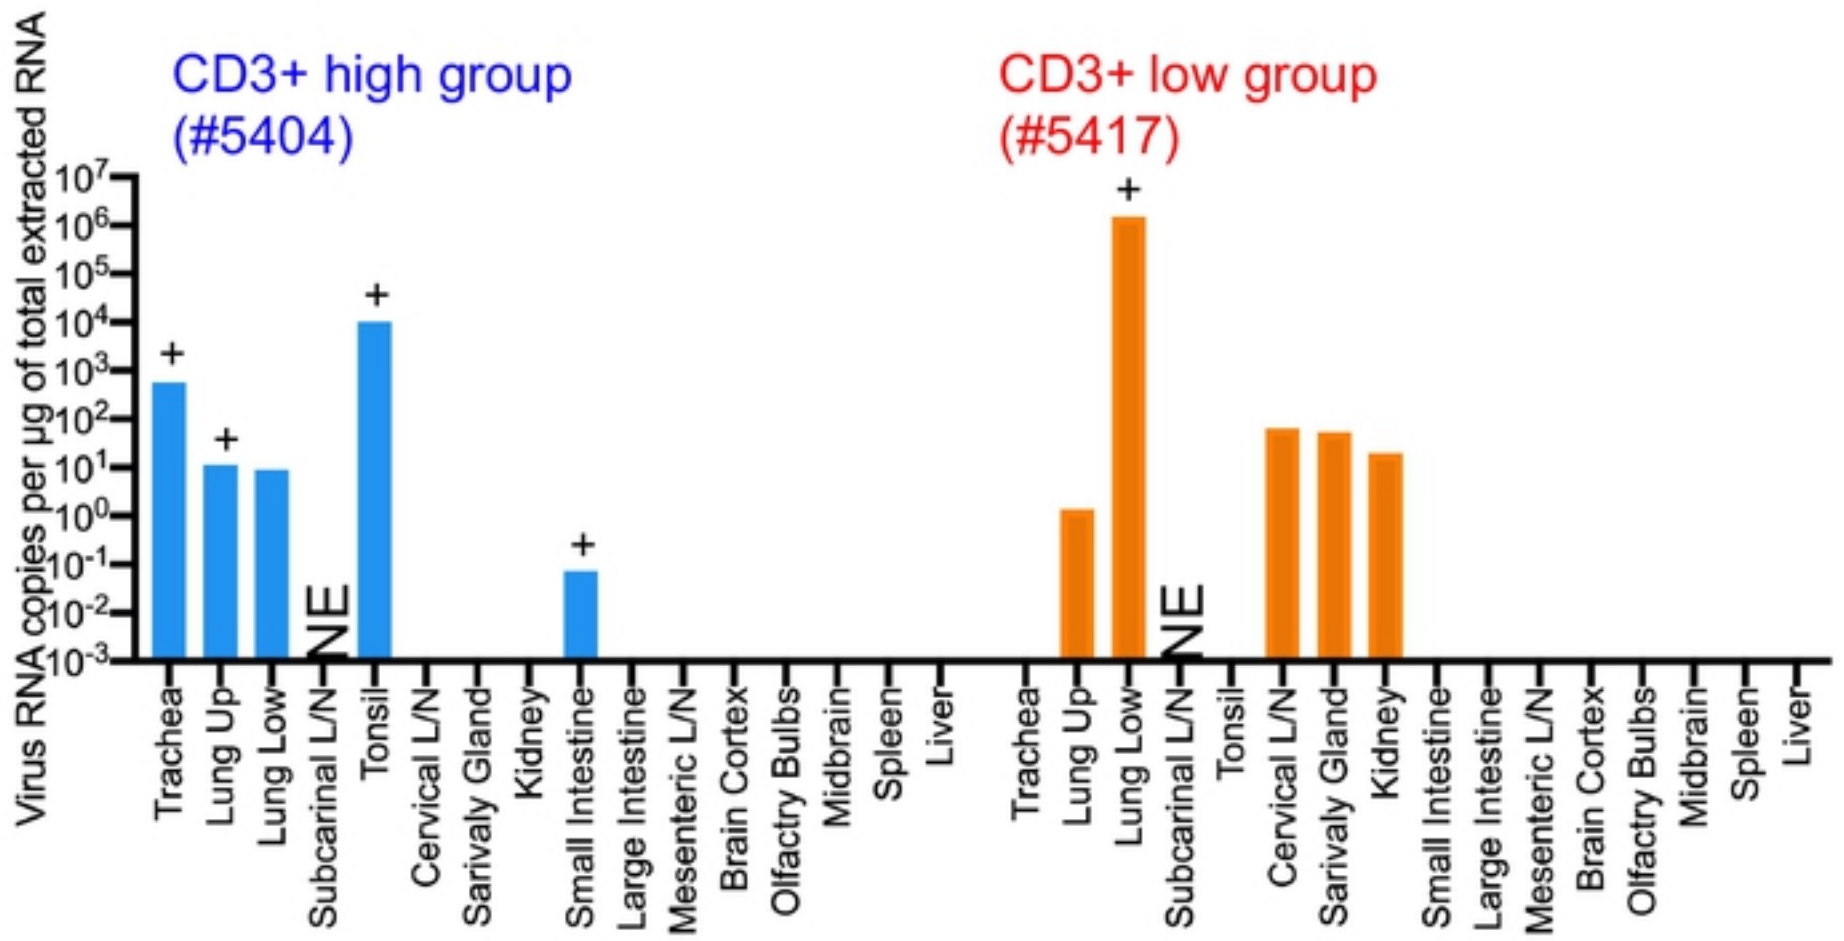

B

bioRxiv preprint doi: <https://doi.org/10.1101/2021.01.07.425698>; this version posted January 7, 2021. The copyright holder for this preprint (which was not certified by peer review) is the author/funder, who has granted bioRxiv a license to display the preprint in perpetuity. It is made available under aCC-BY 4.0 International license.

R7 days p.i.

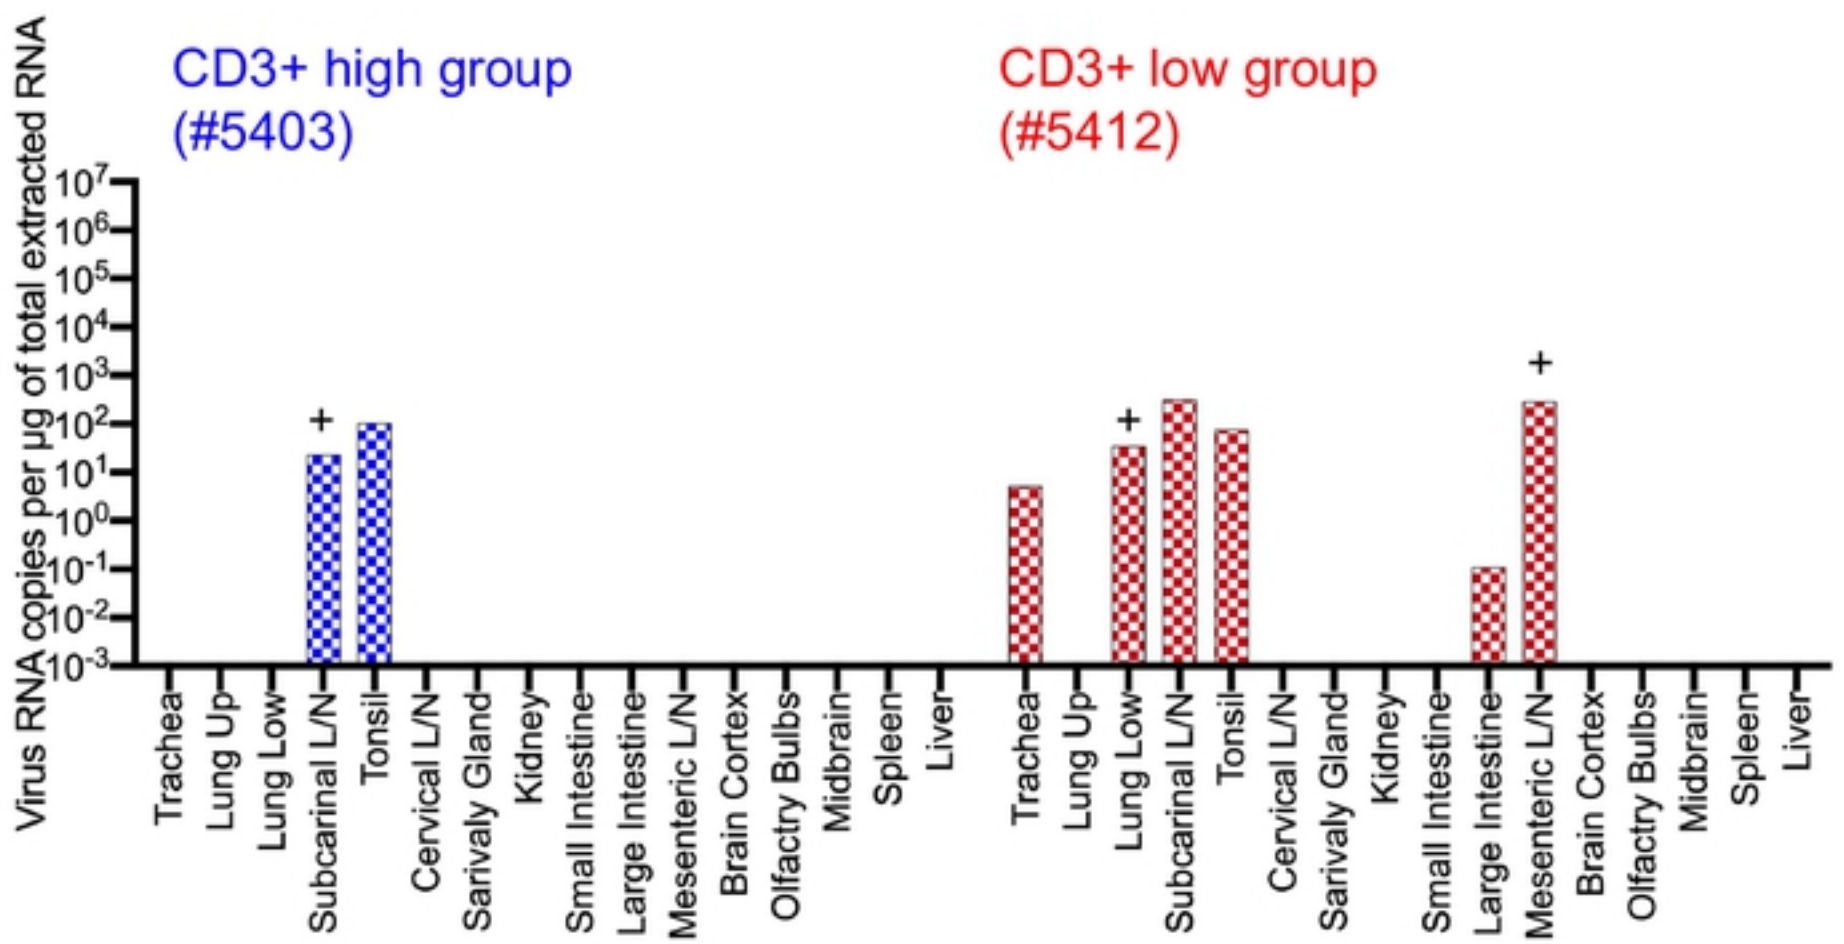

C

R14 days p.i.

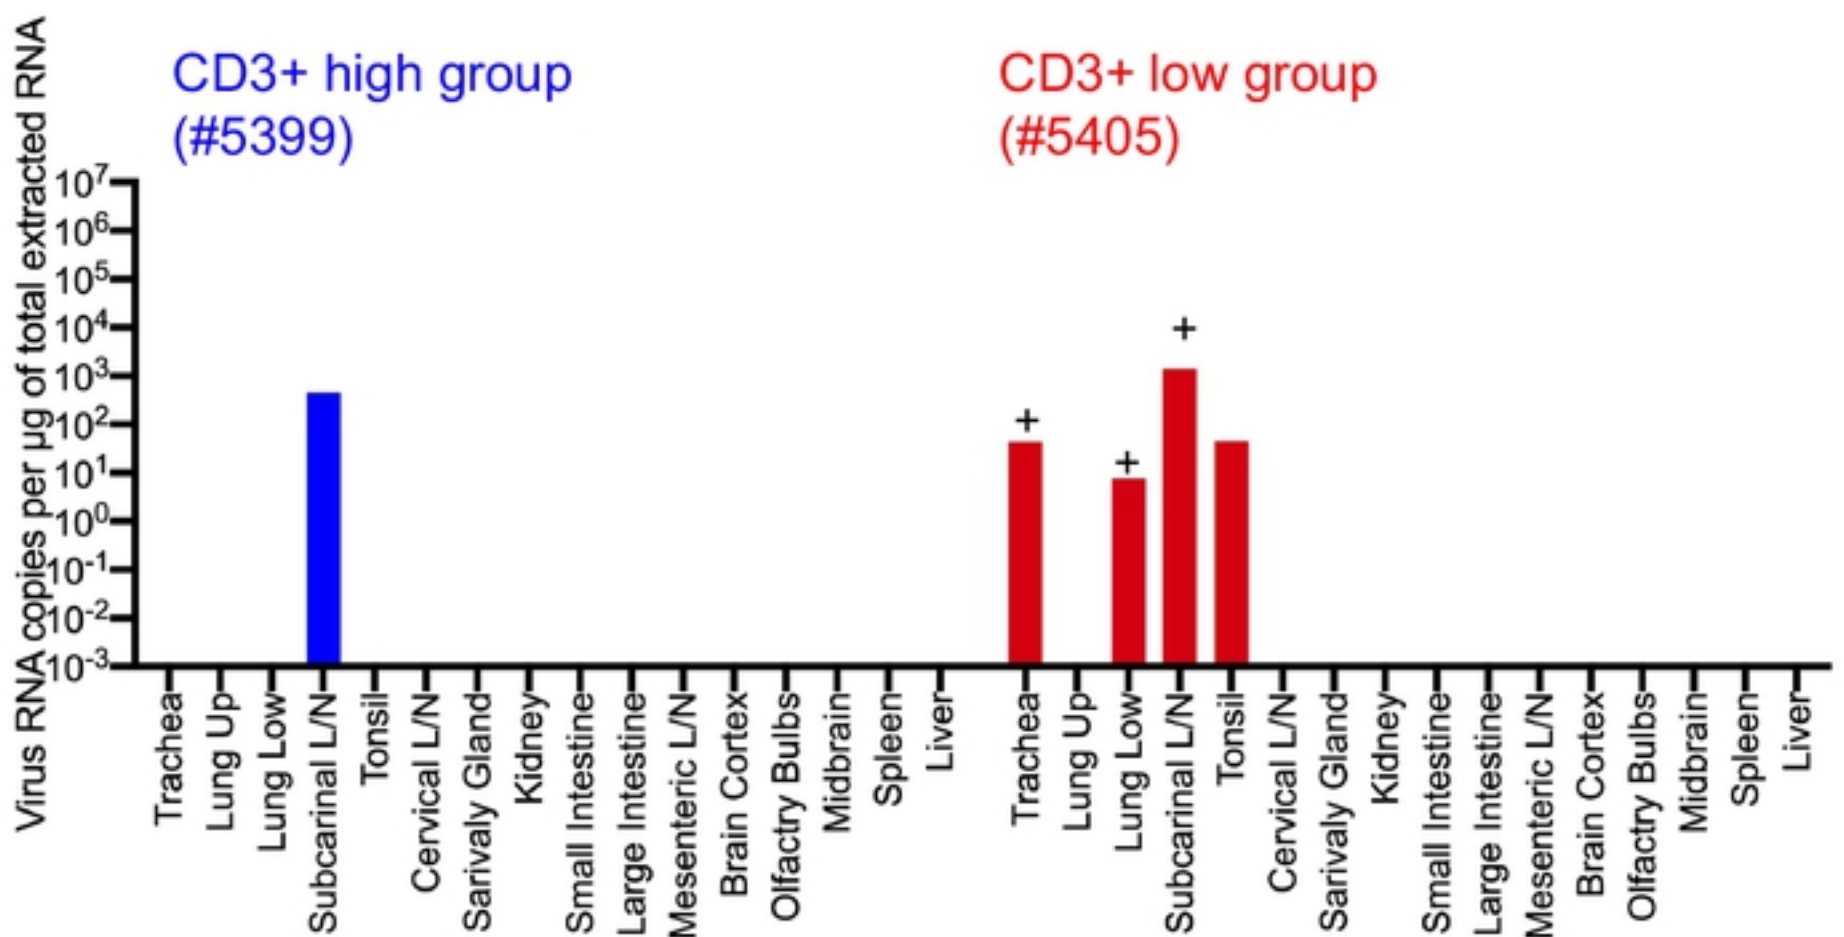

Figure 6

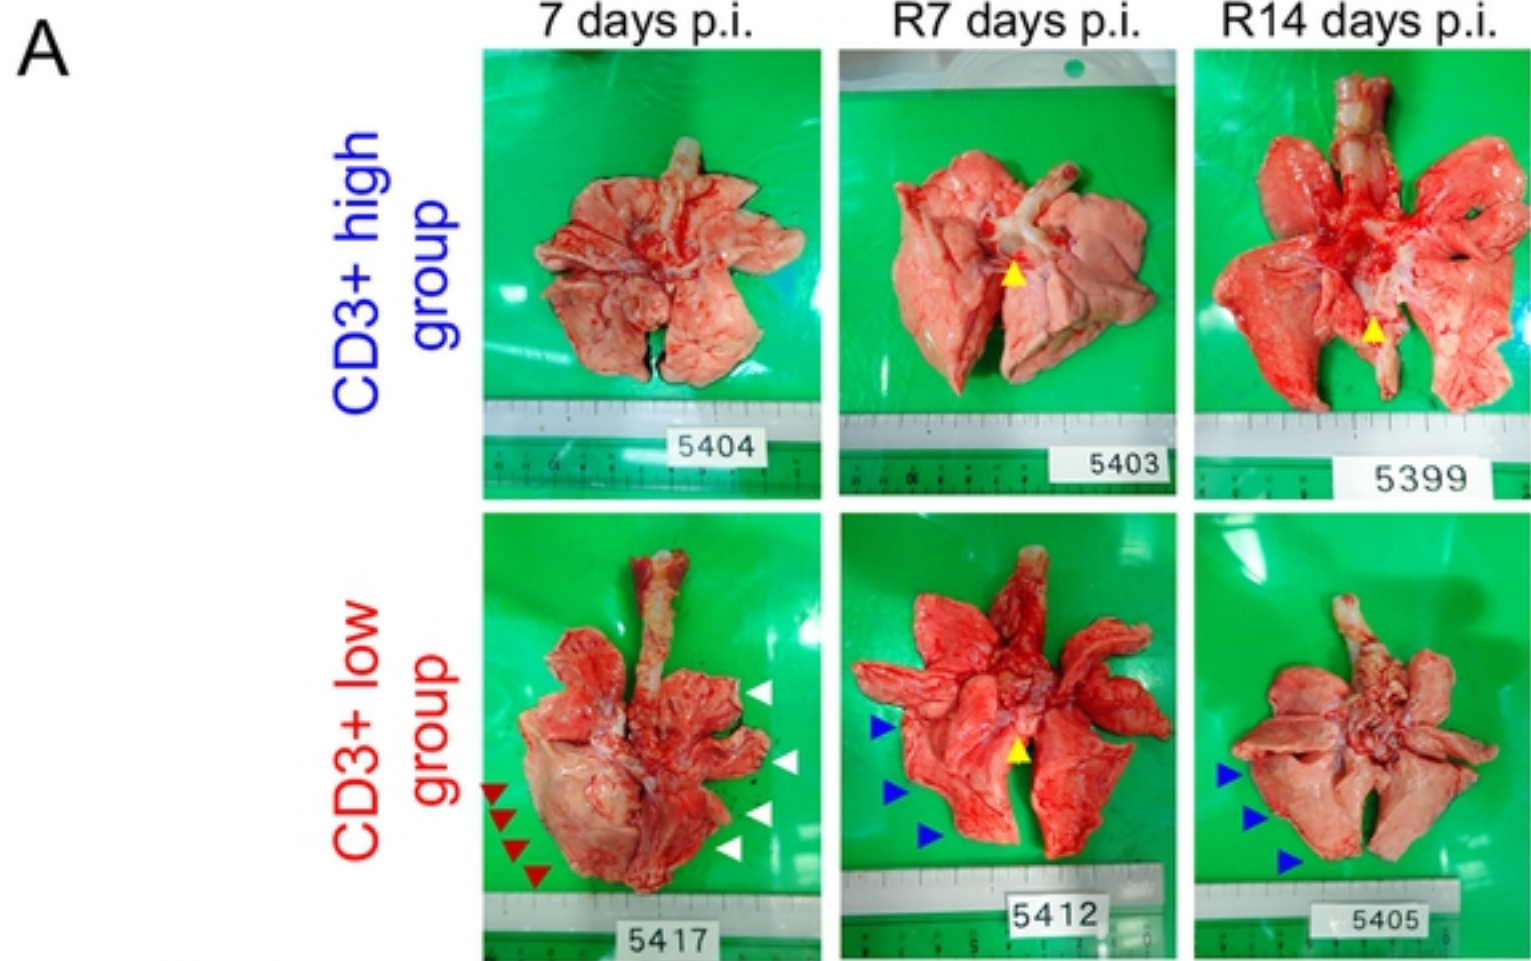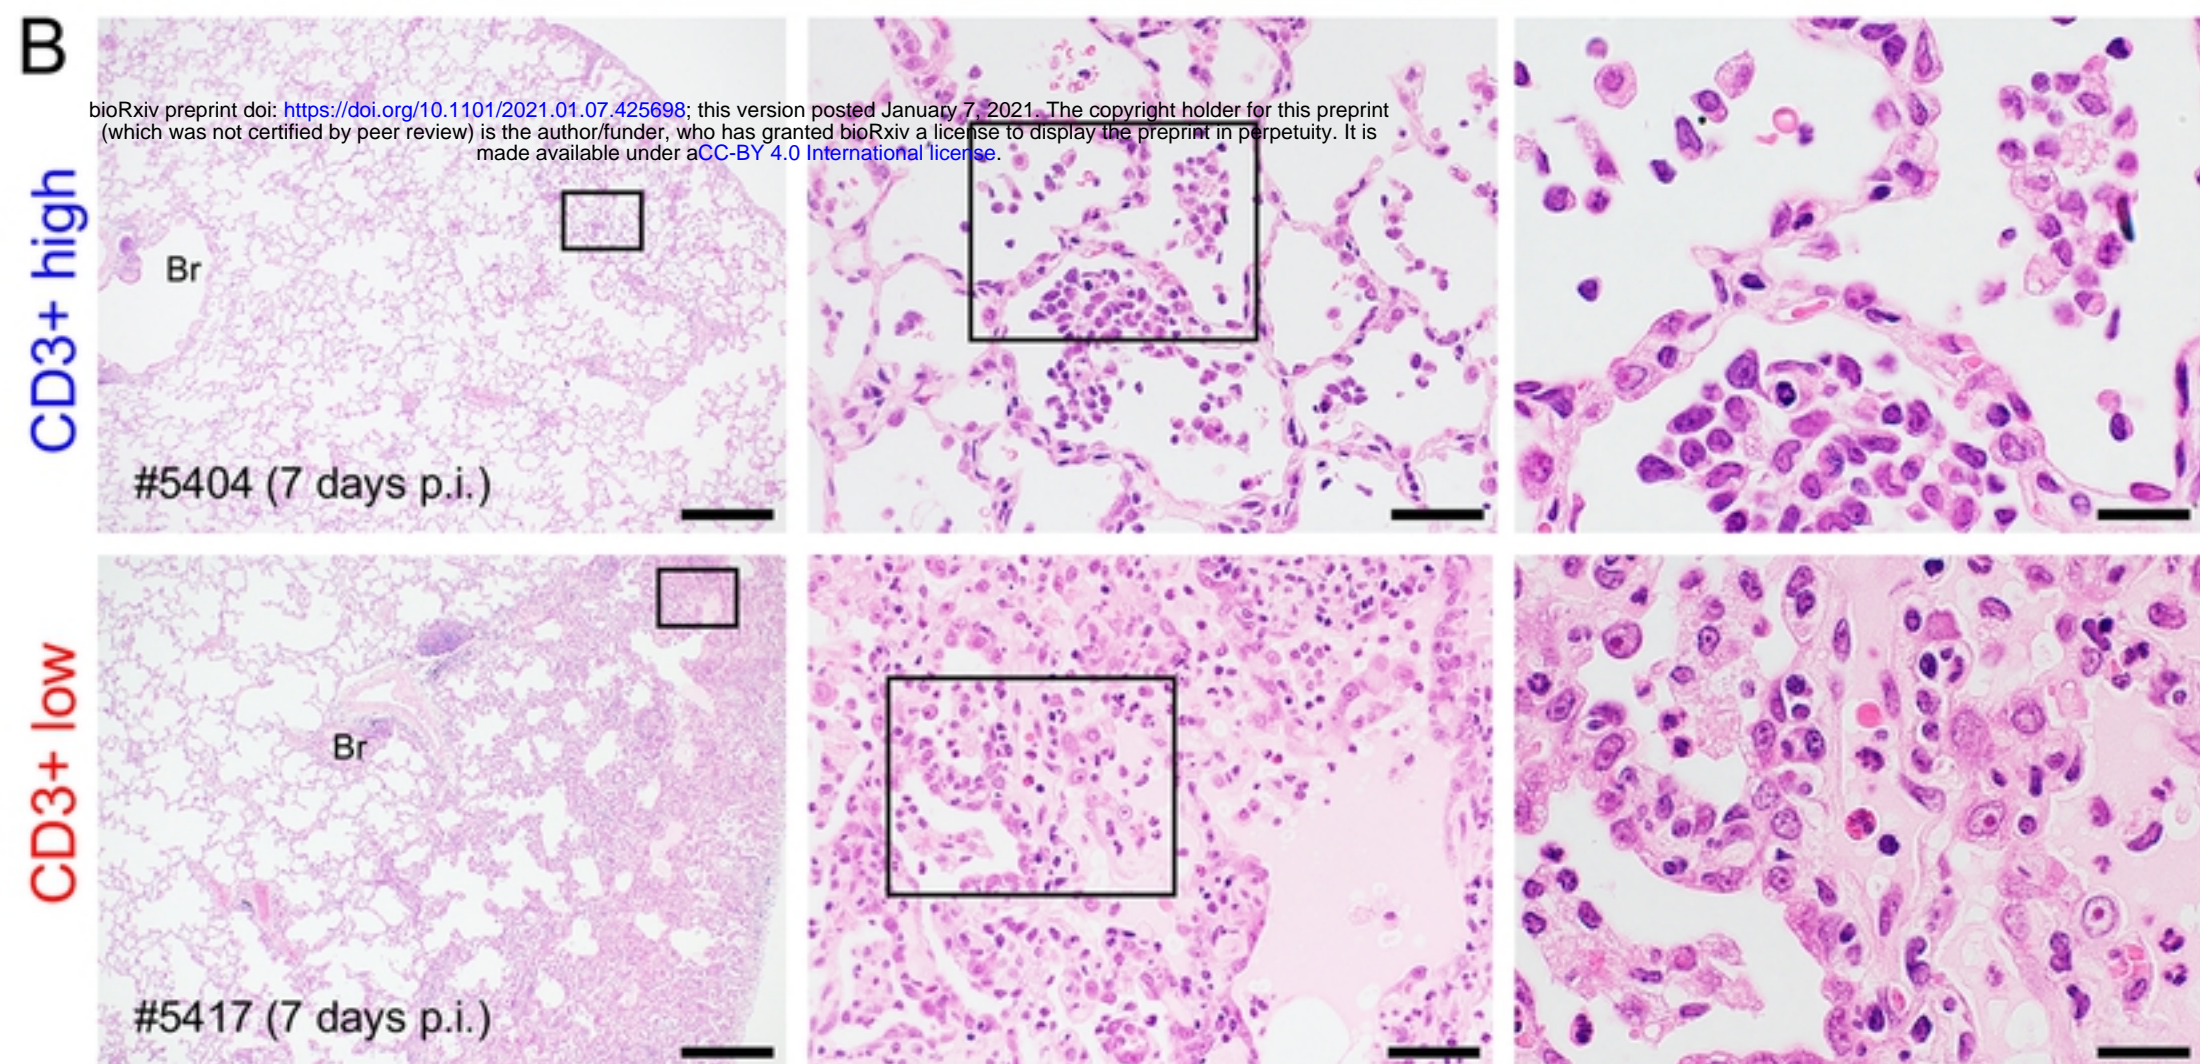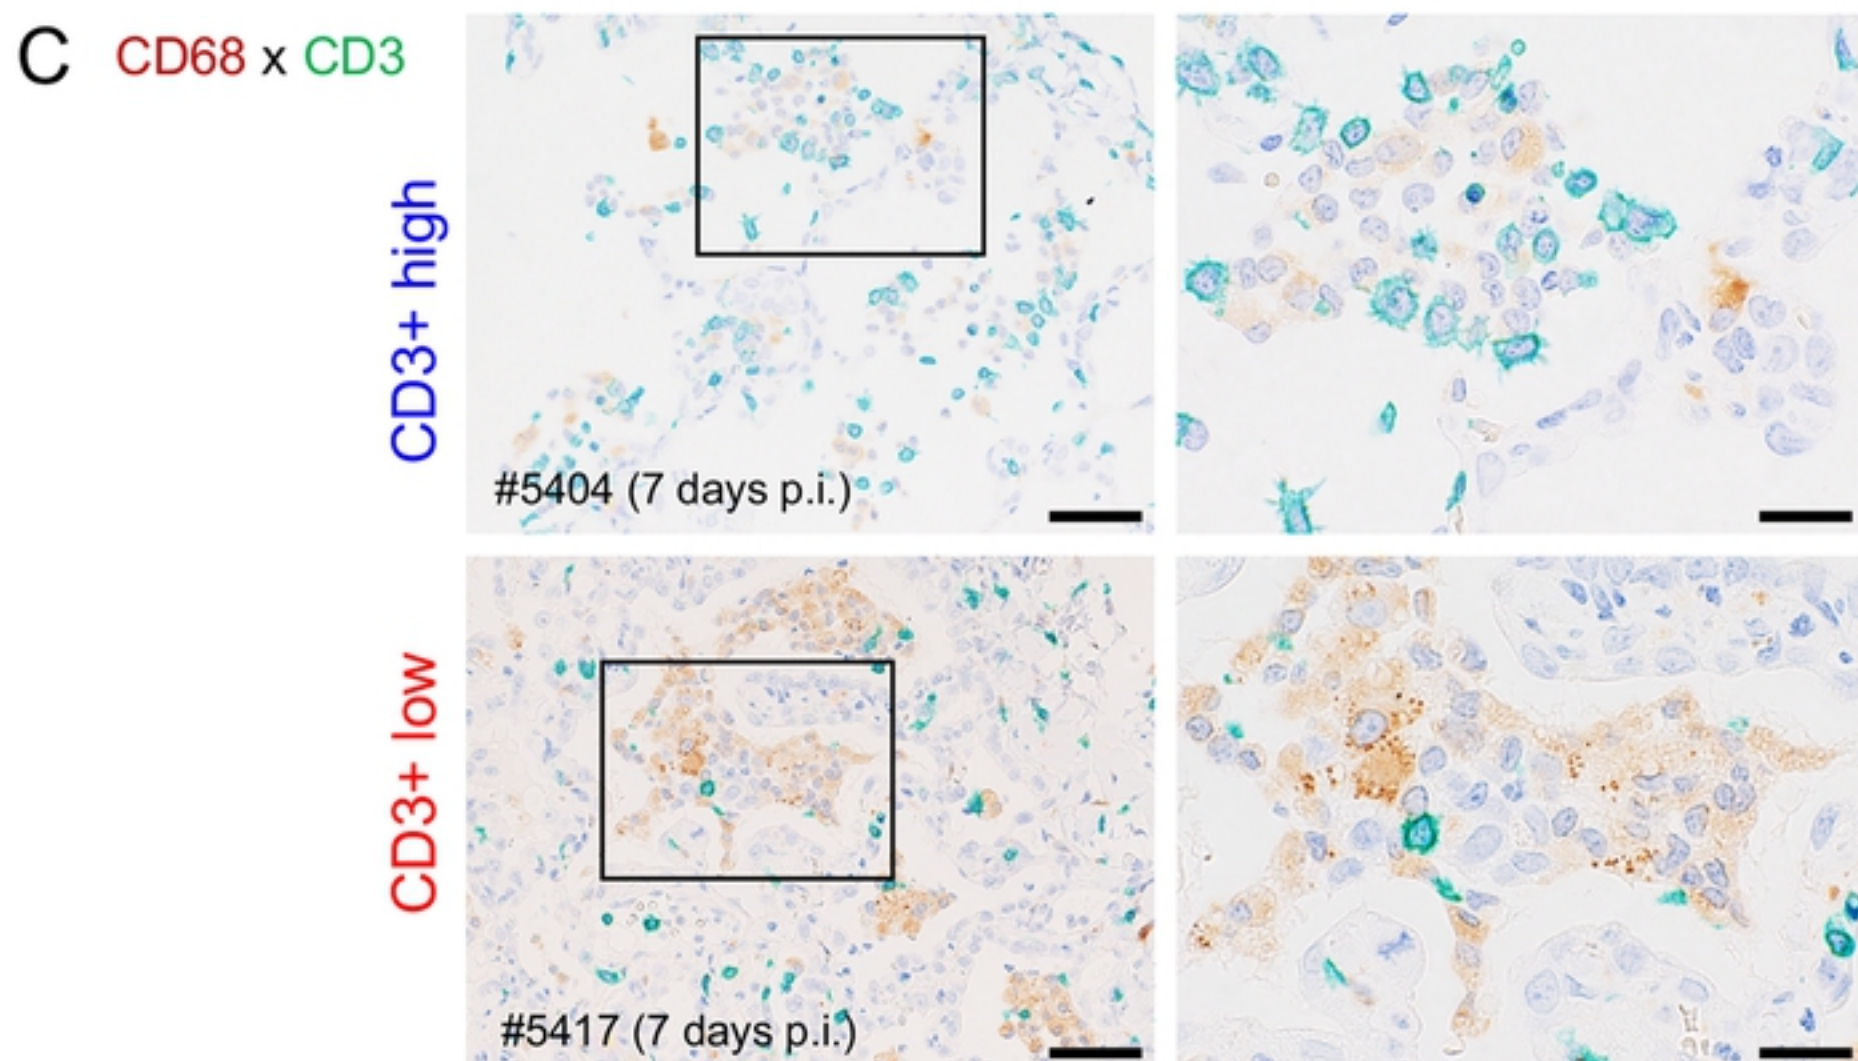

Figure 7
